# Supplementary material for: Mapping genetic variants for cranial vault shape in humans
Source: PubMed Central journal article supplement (PMC5919379; doi:10.1371/journal.pone.0196148), 2018-04-26

Figure S5

# meta.MCW

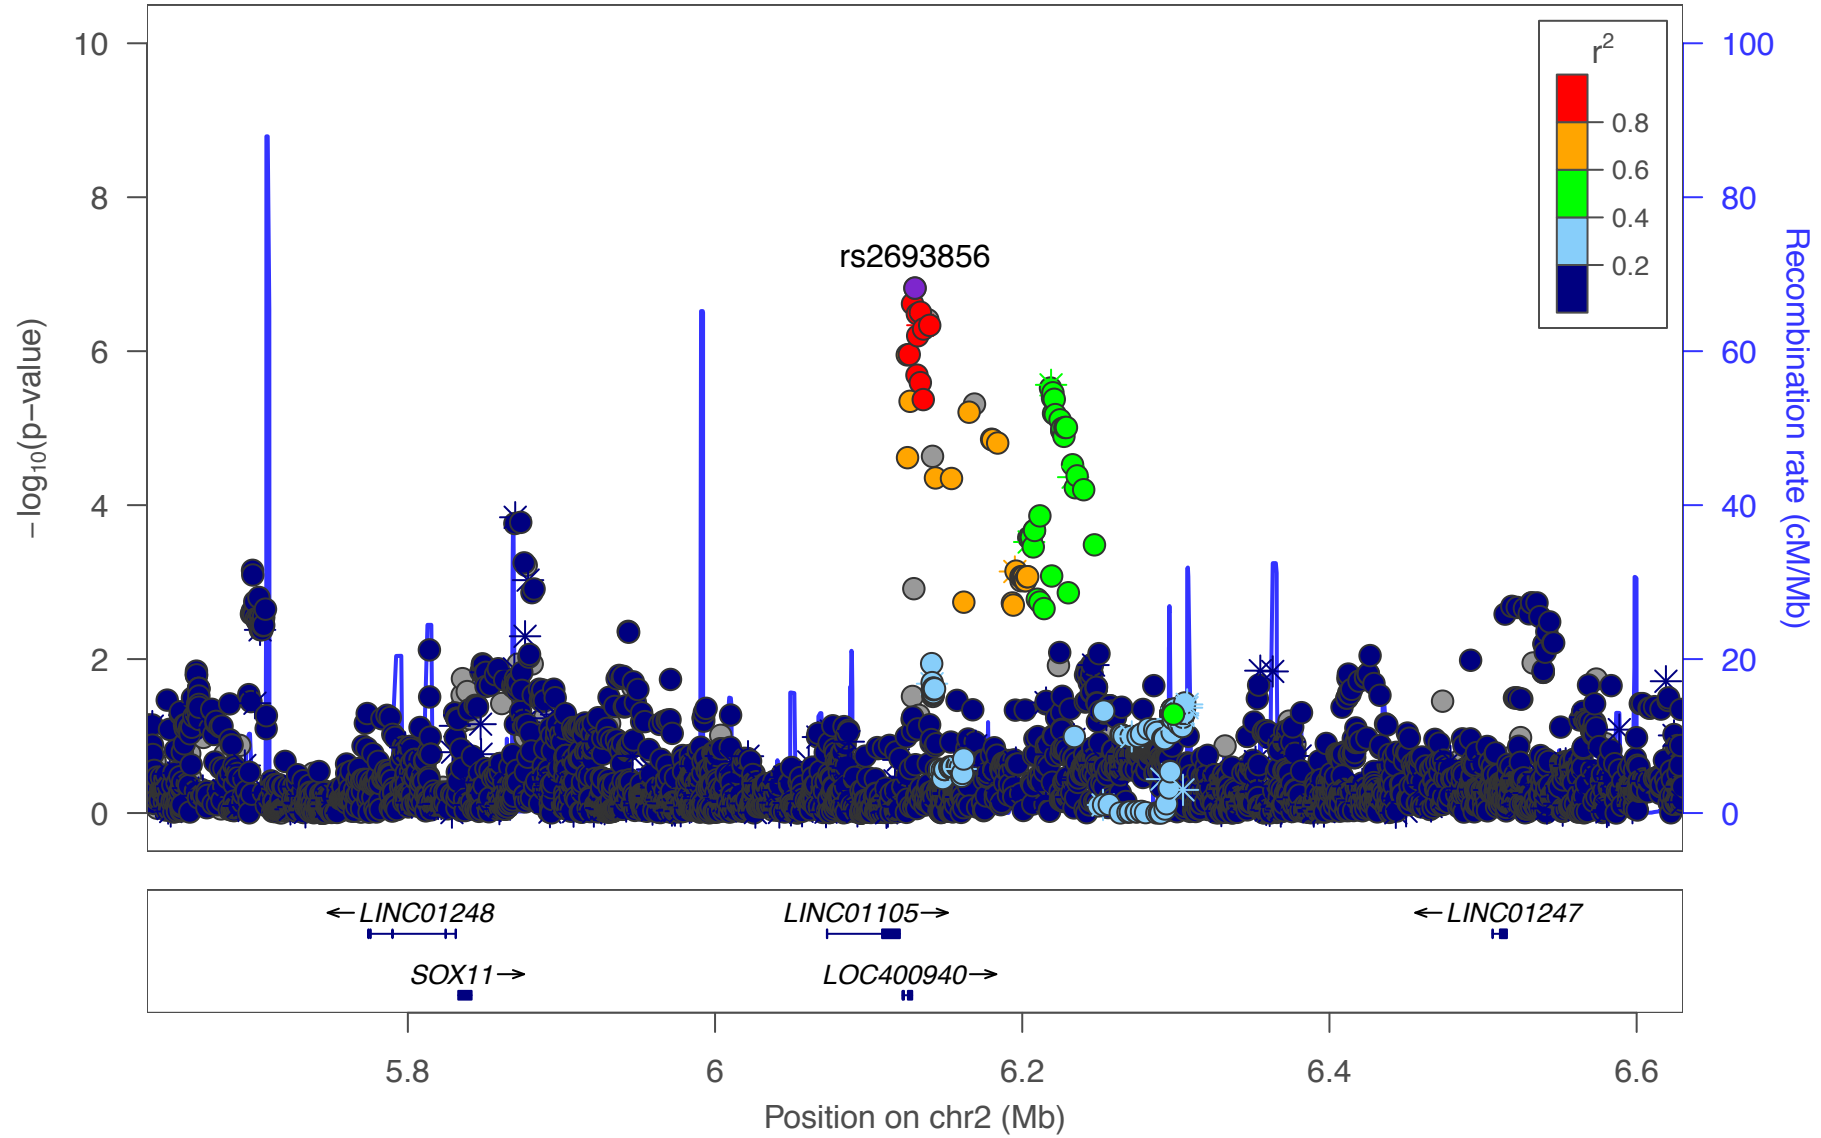

# meta.MCW

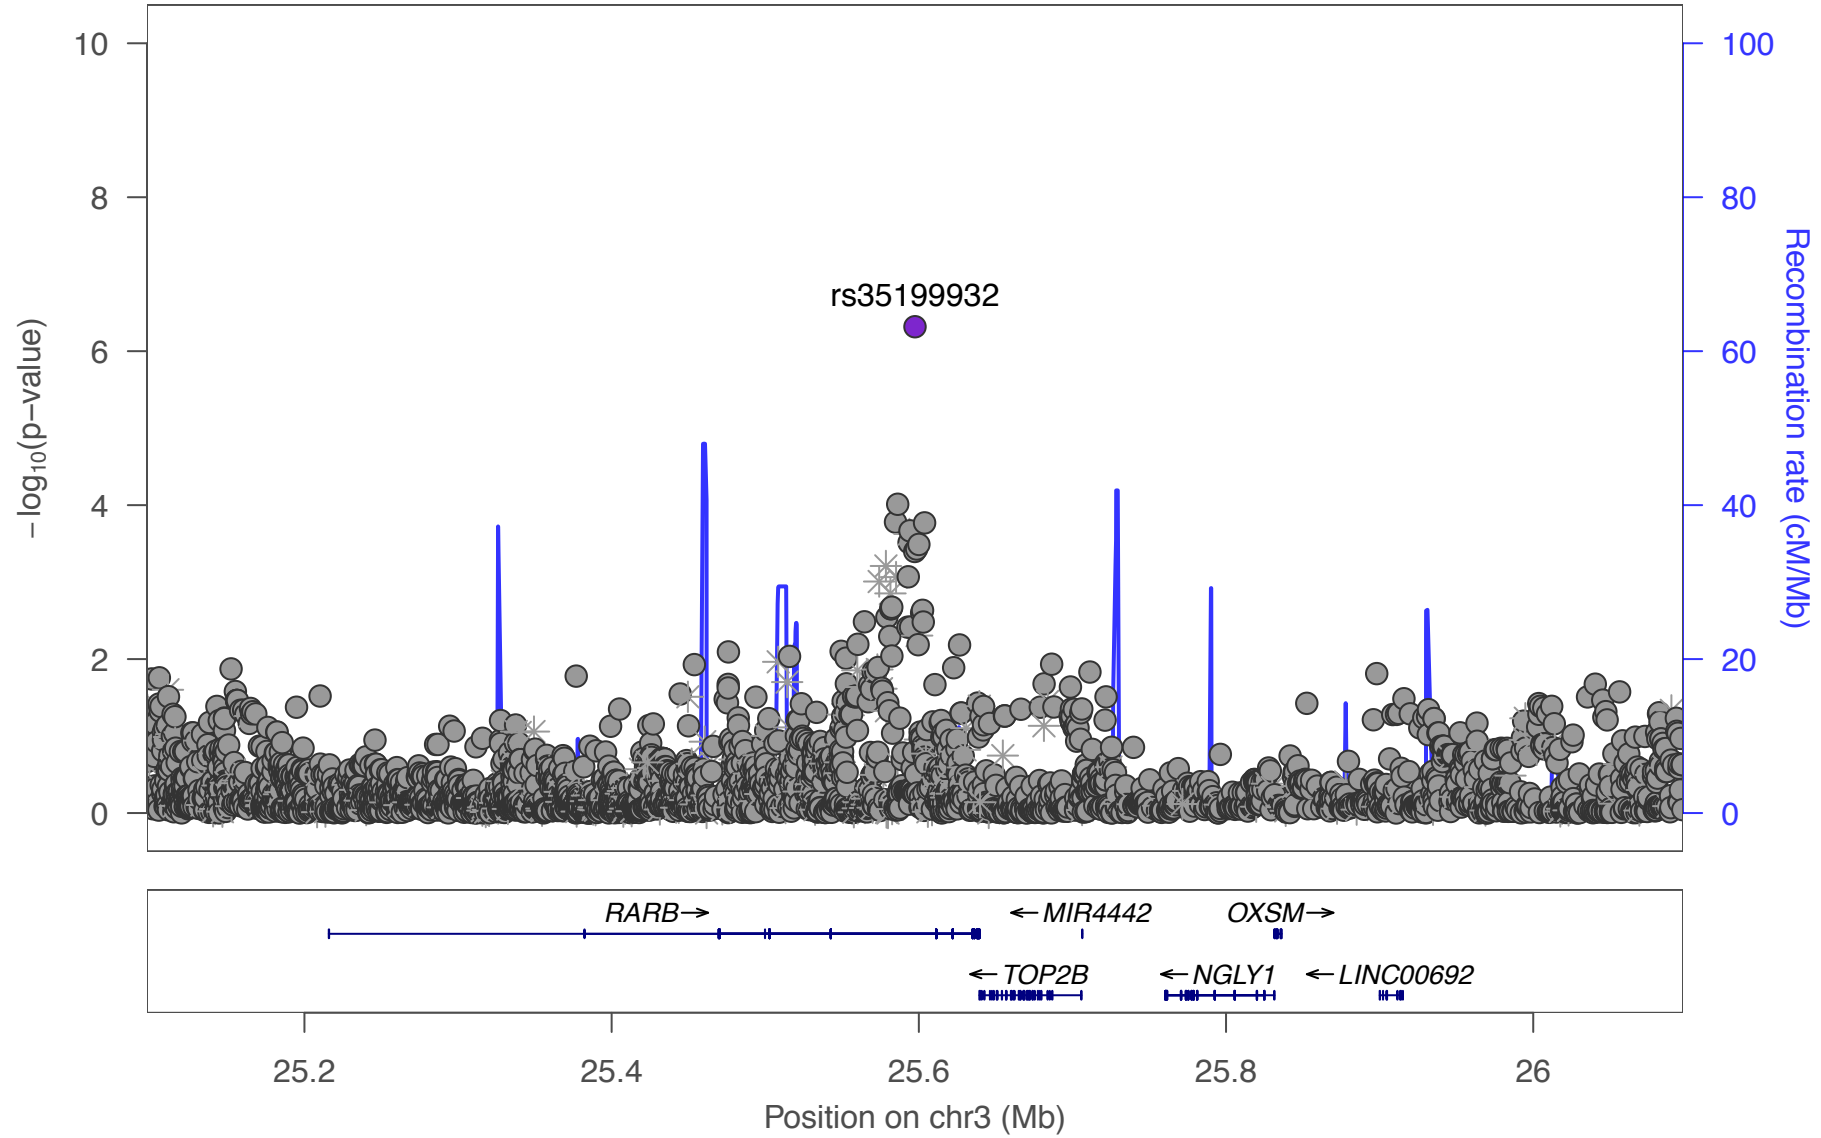

# meta.MCW

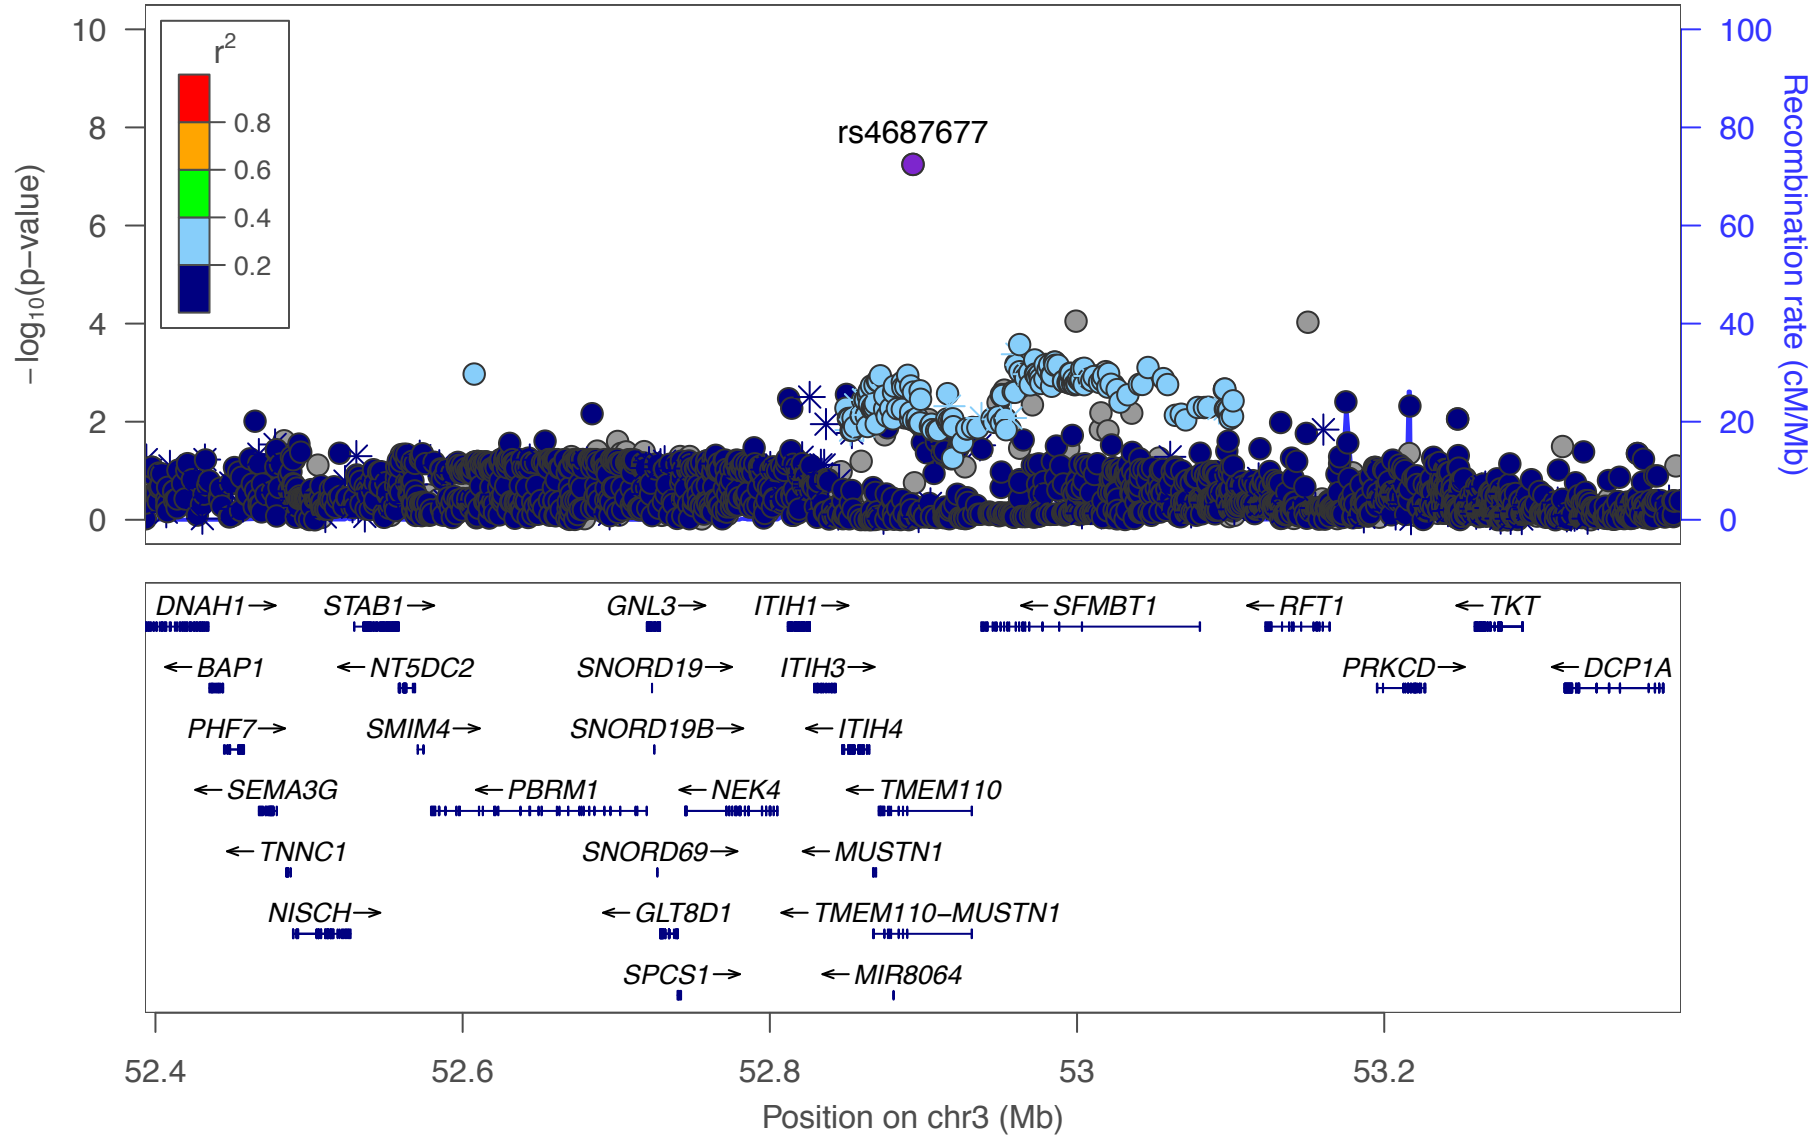

# meta.MCW

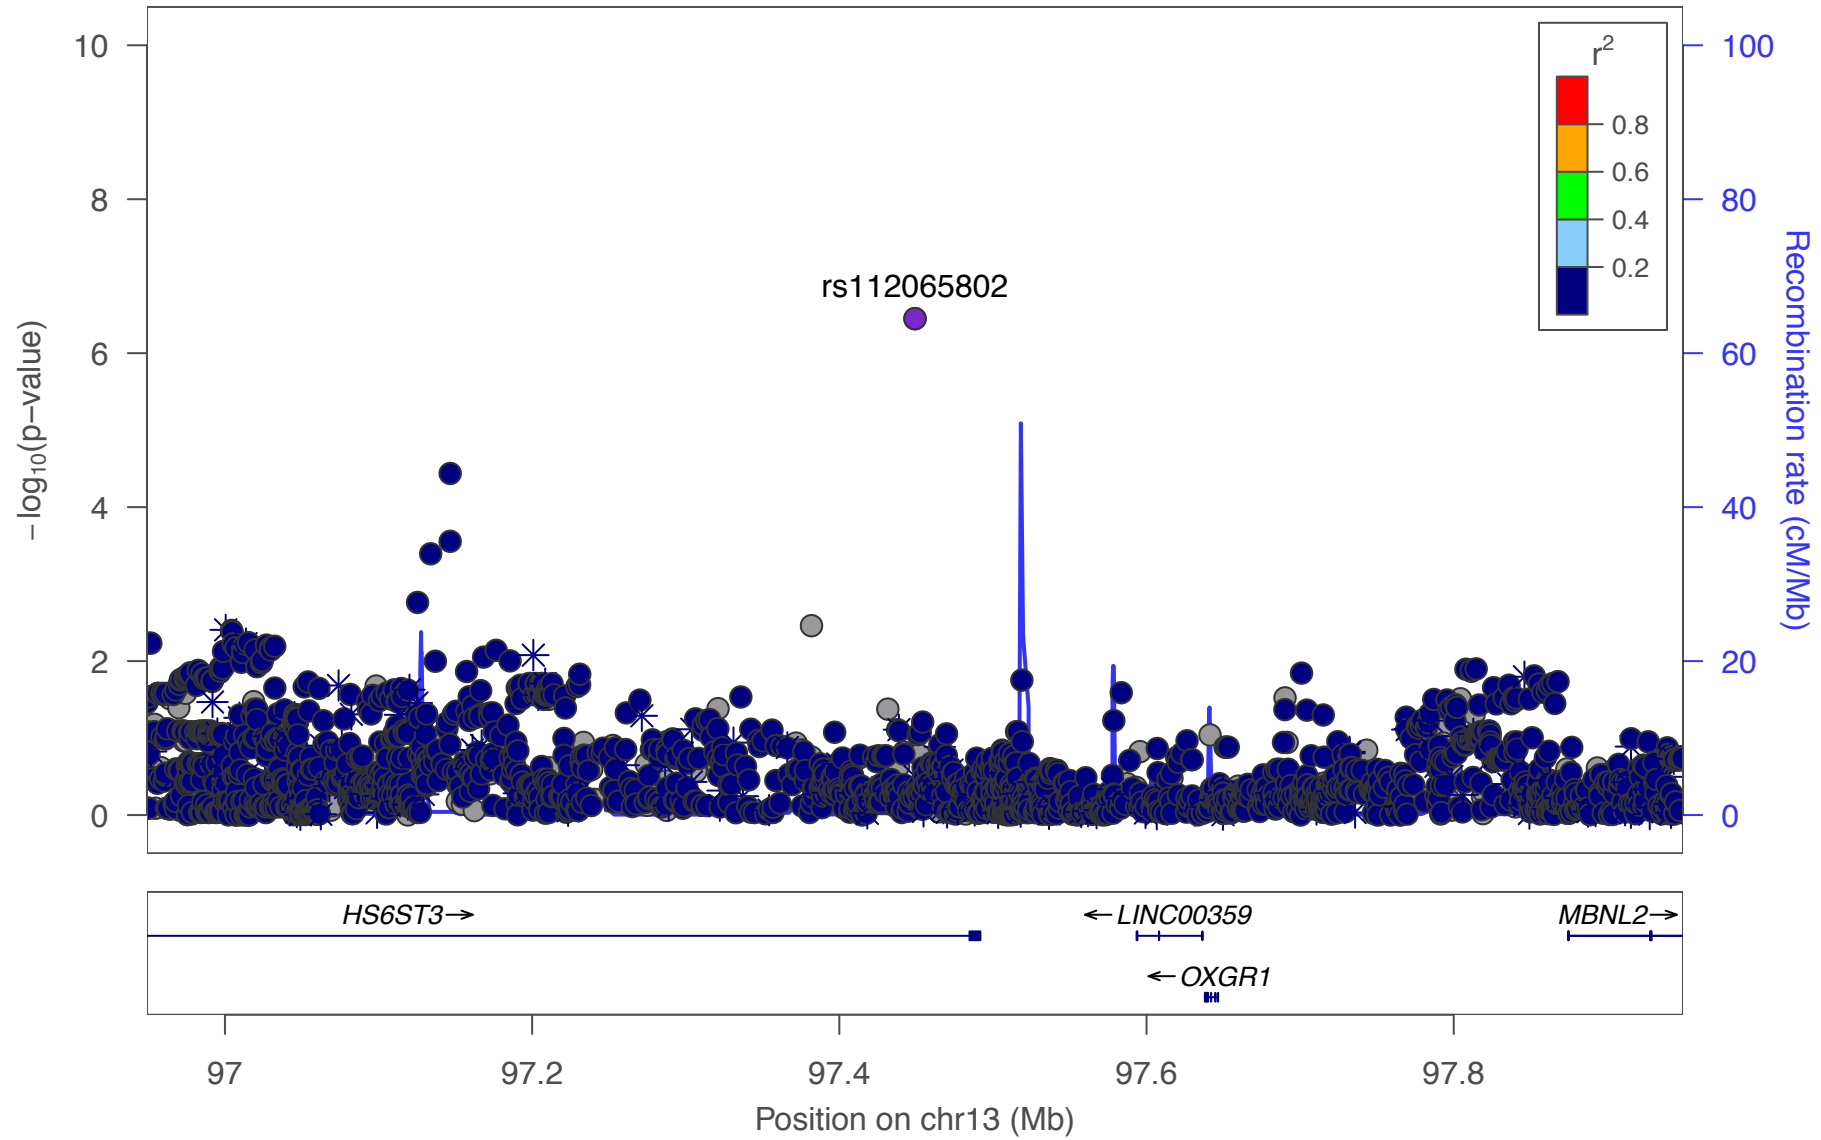

# meta.MCW

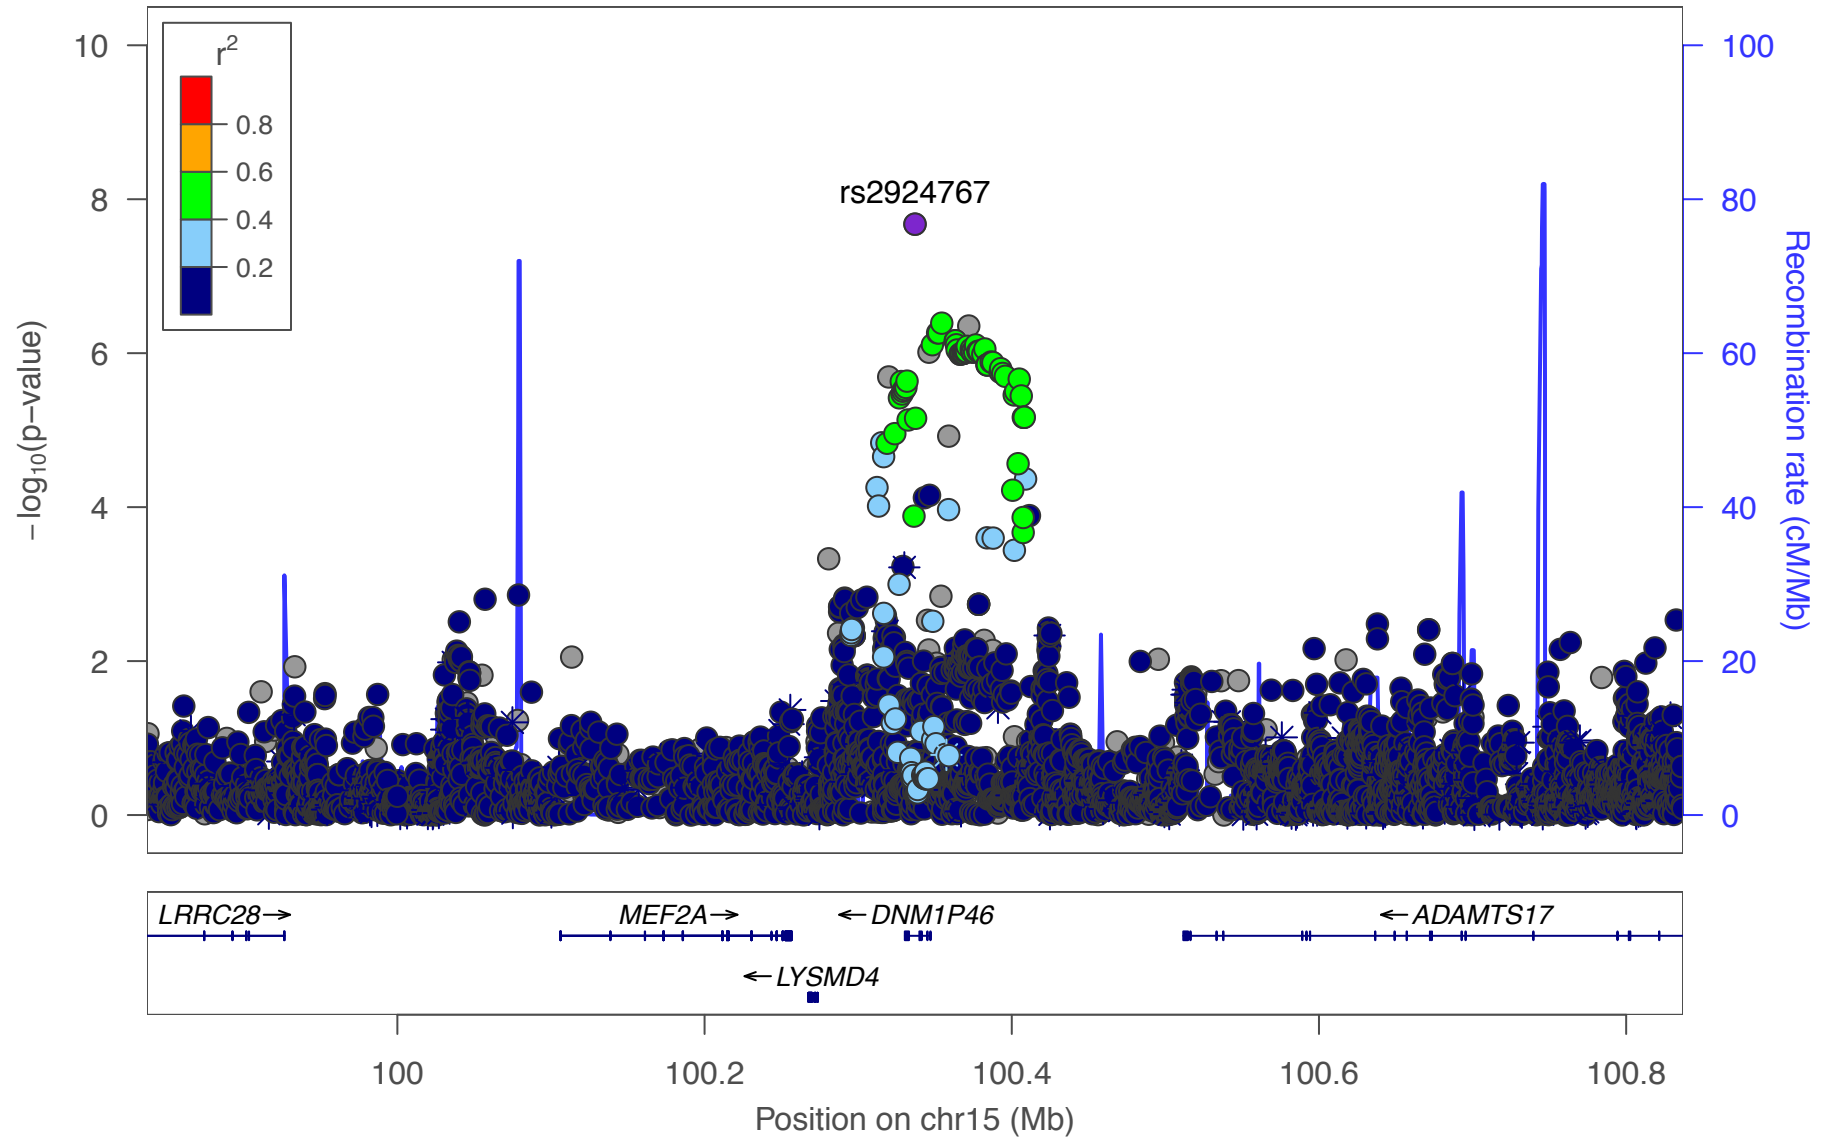

# meta.MCW

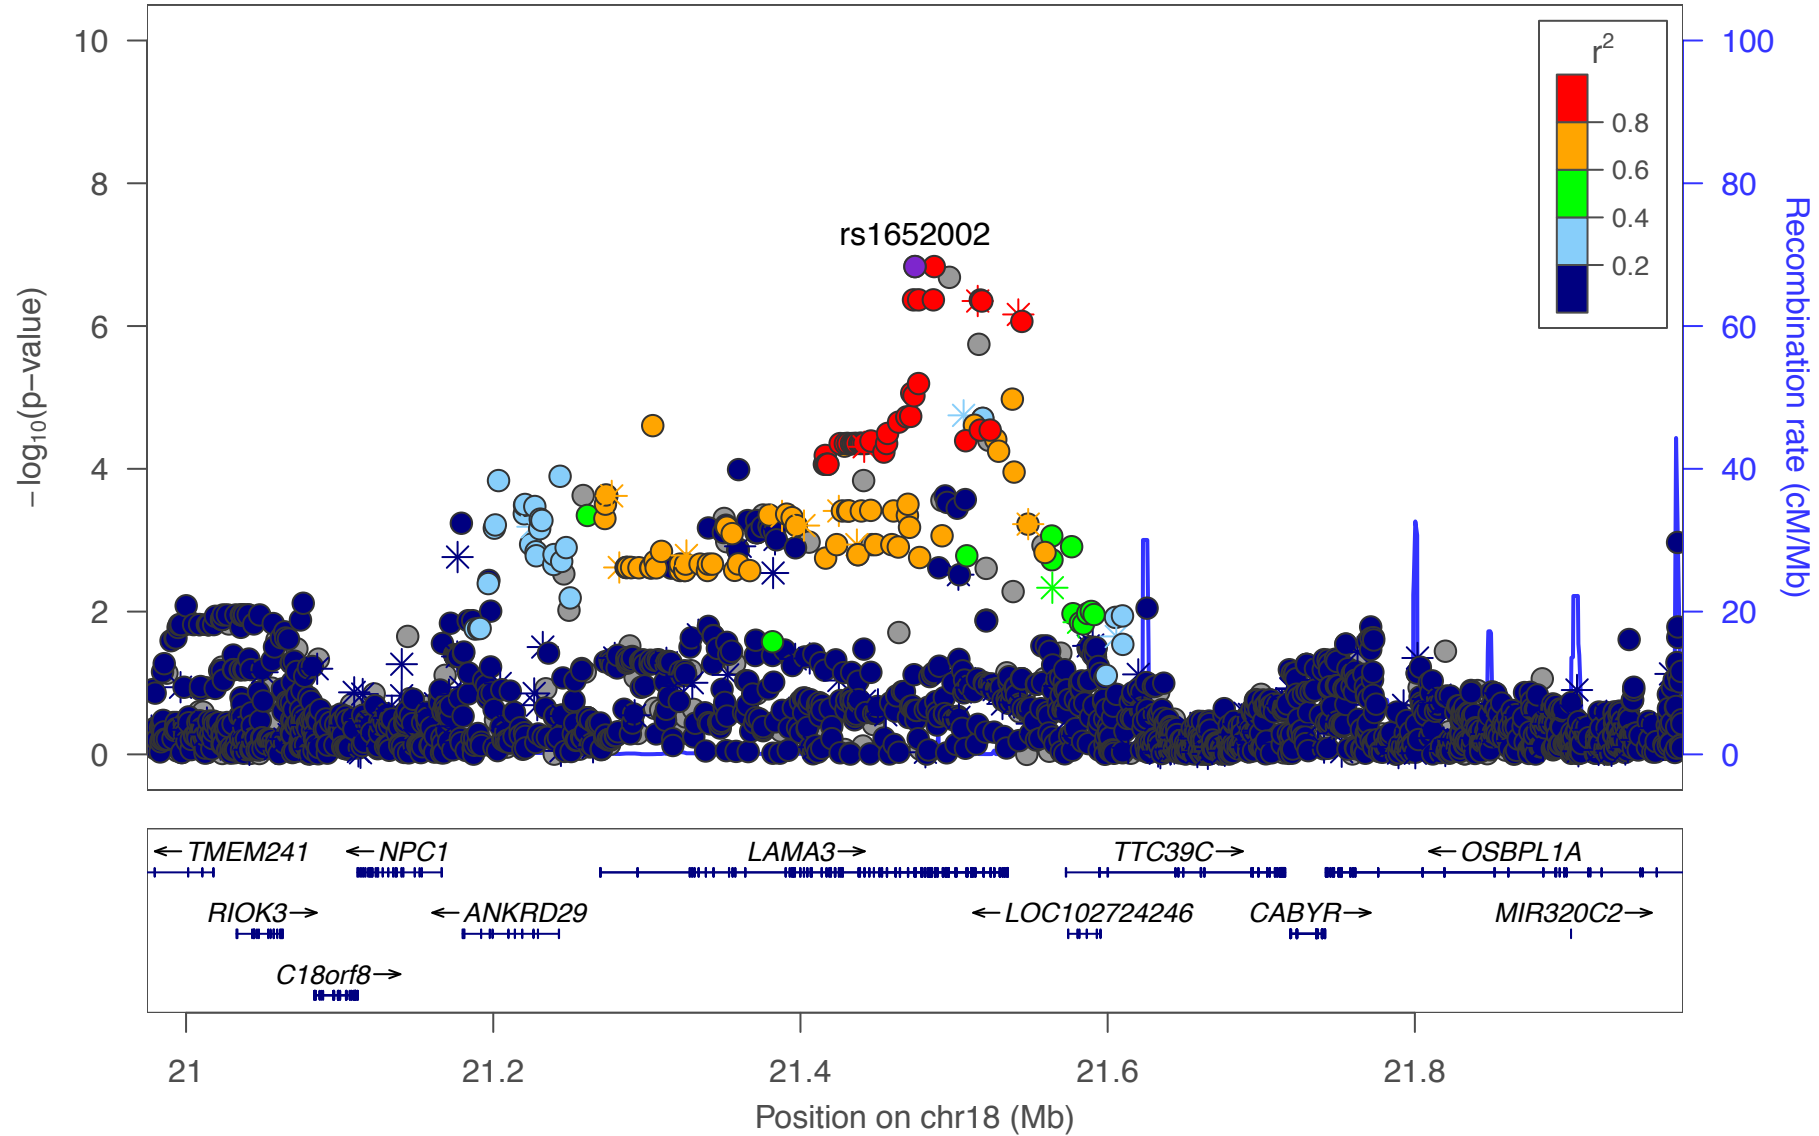

# meta.MCW

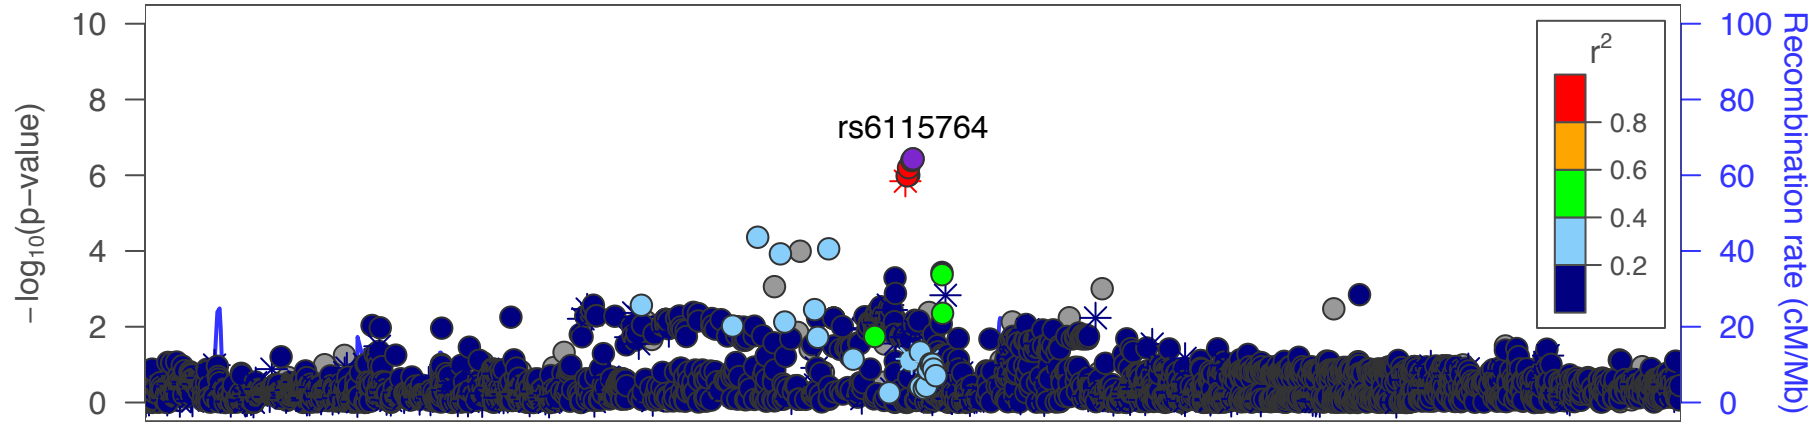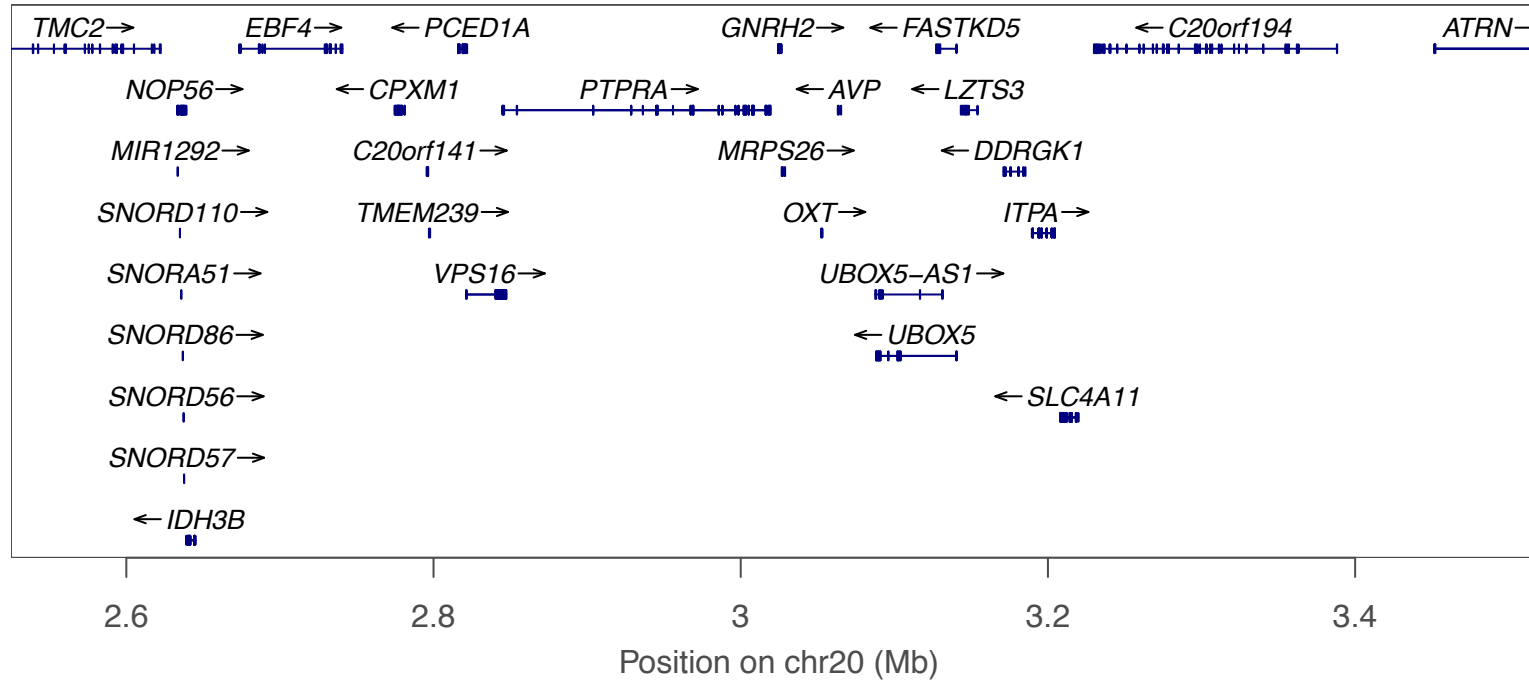

# meta.MCL

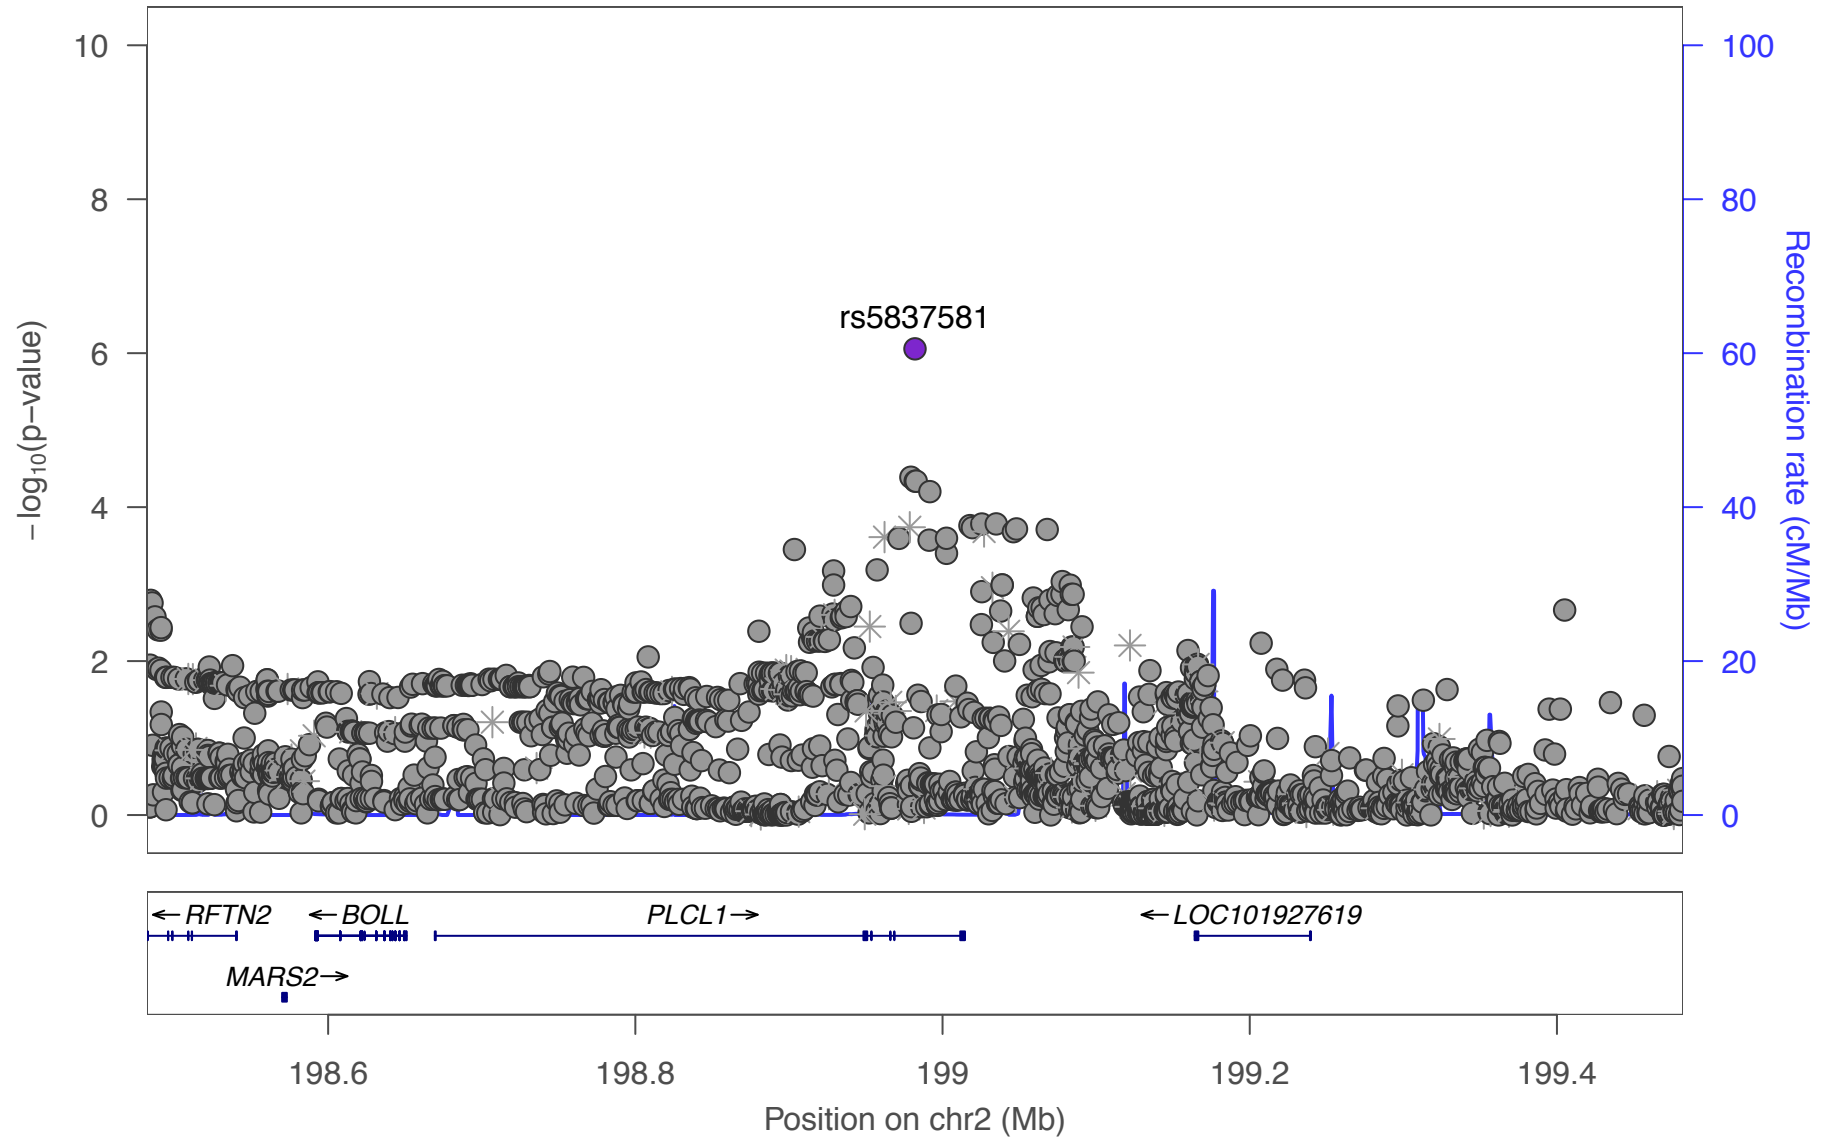



# meta.MCL

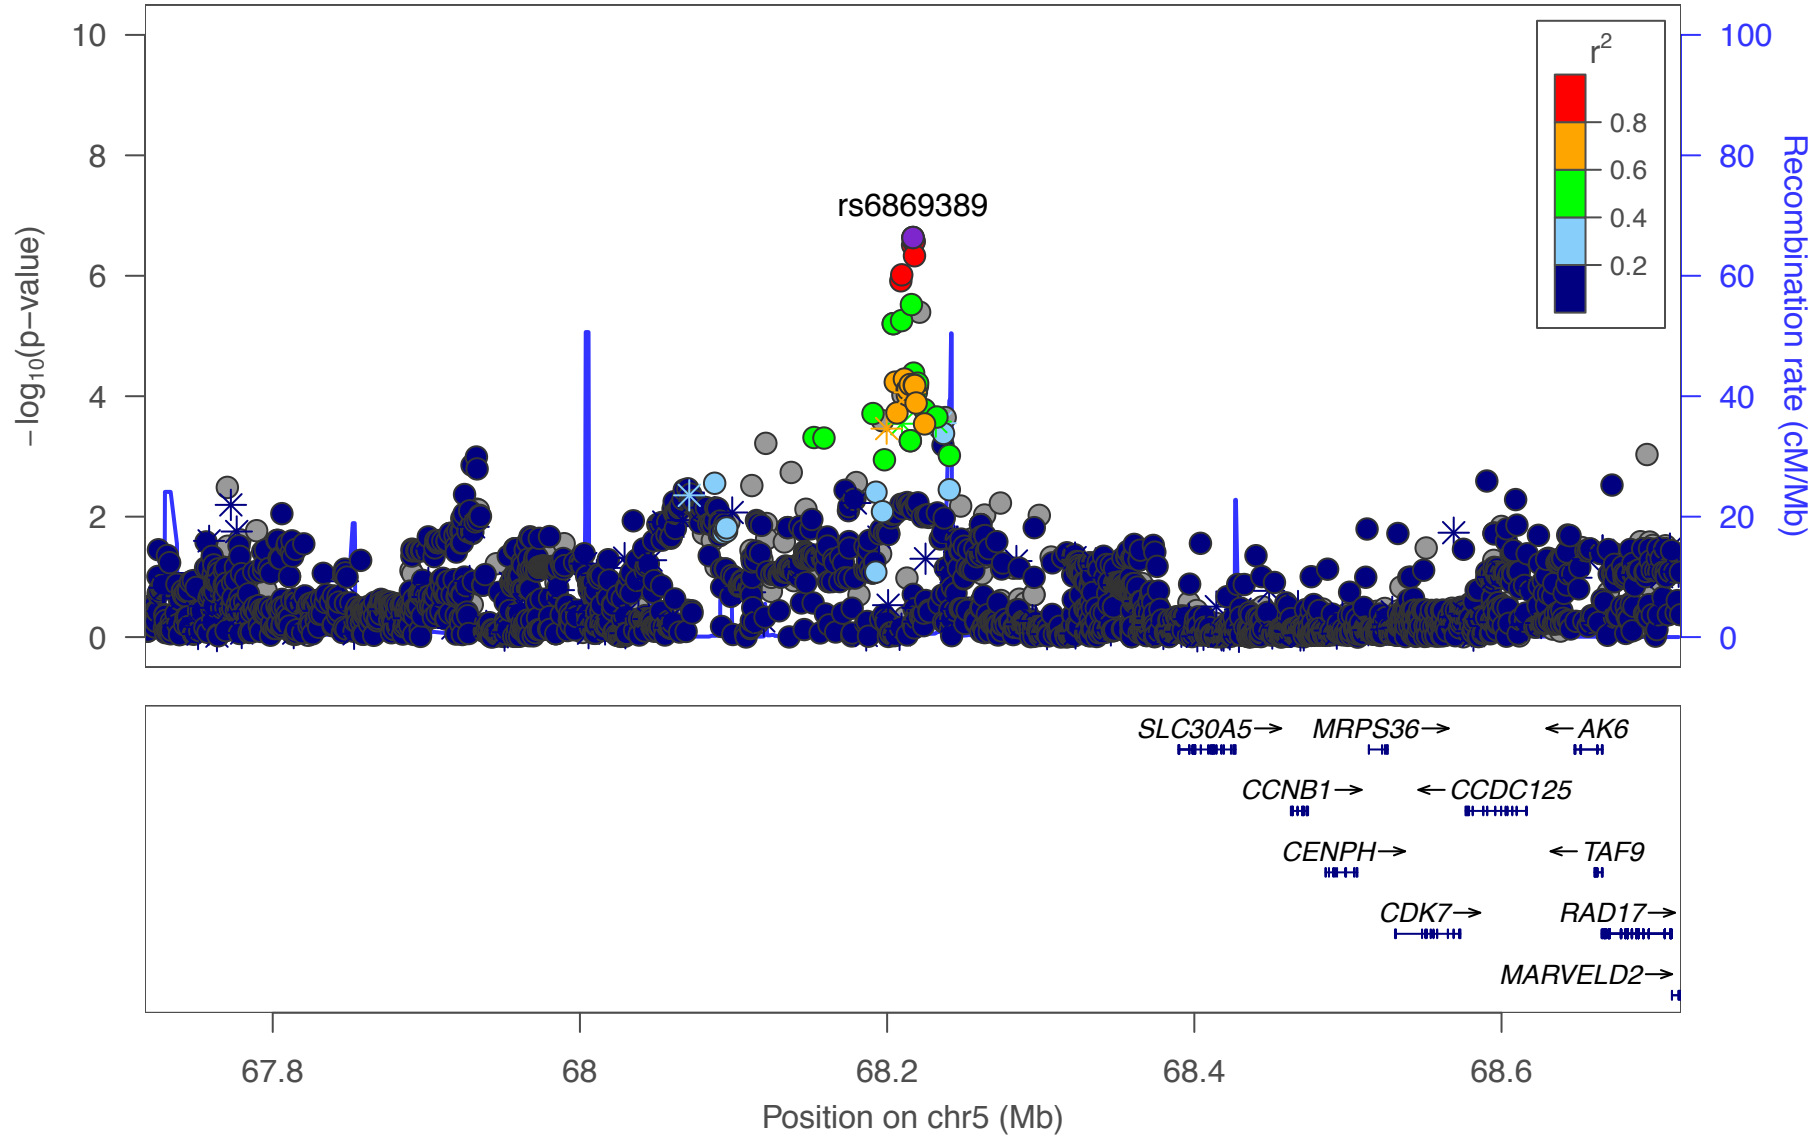

# meta.MCL

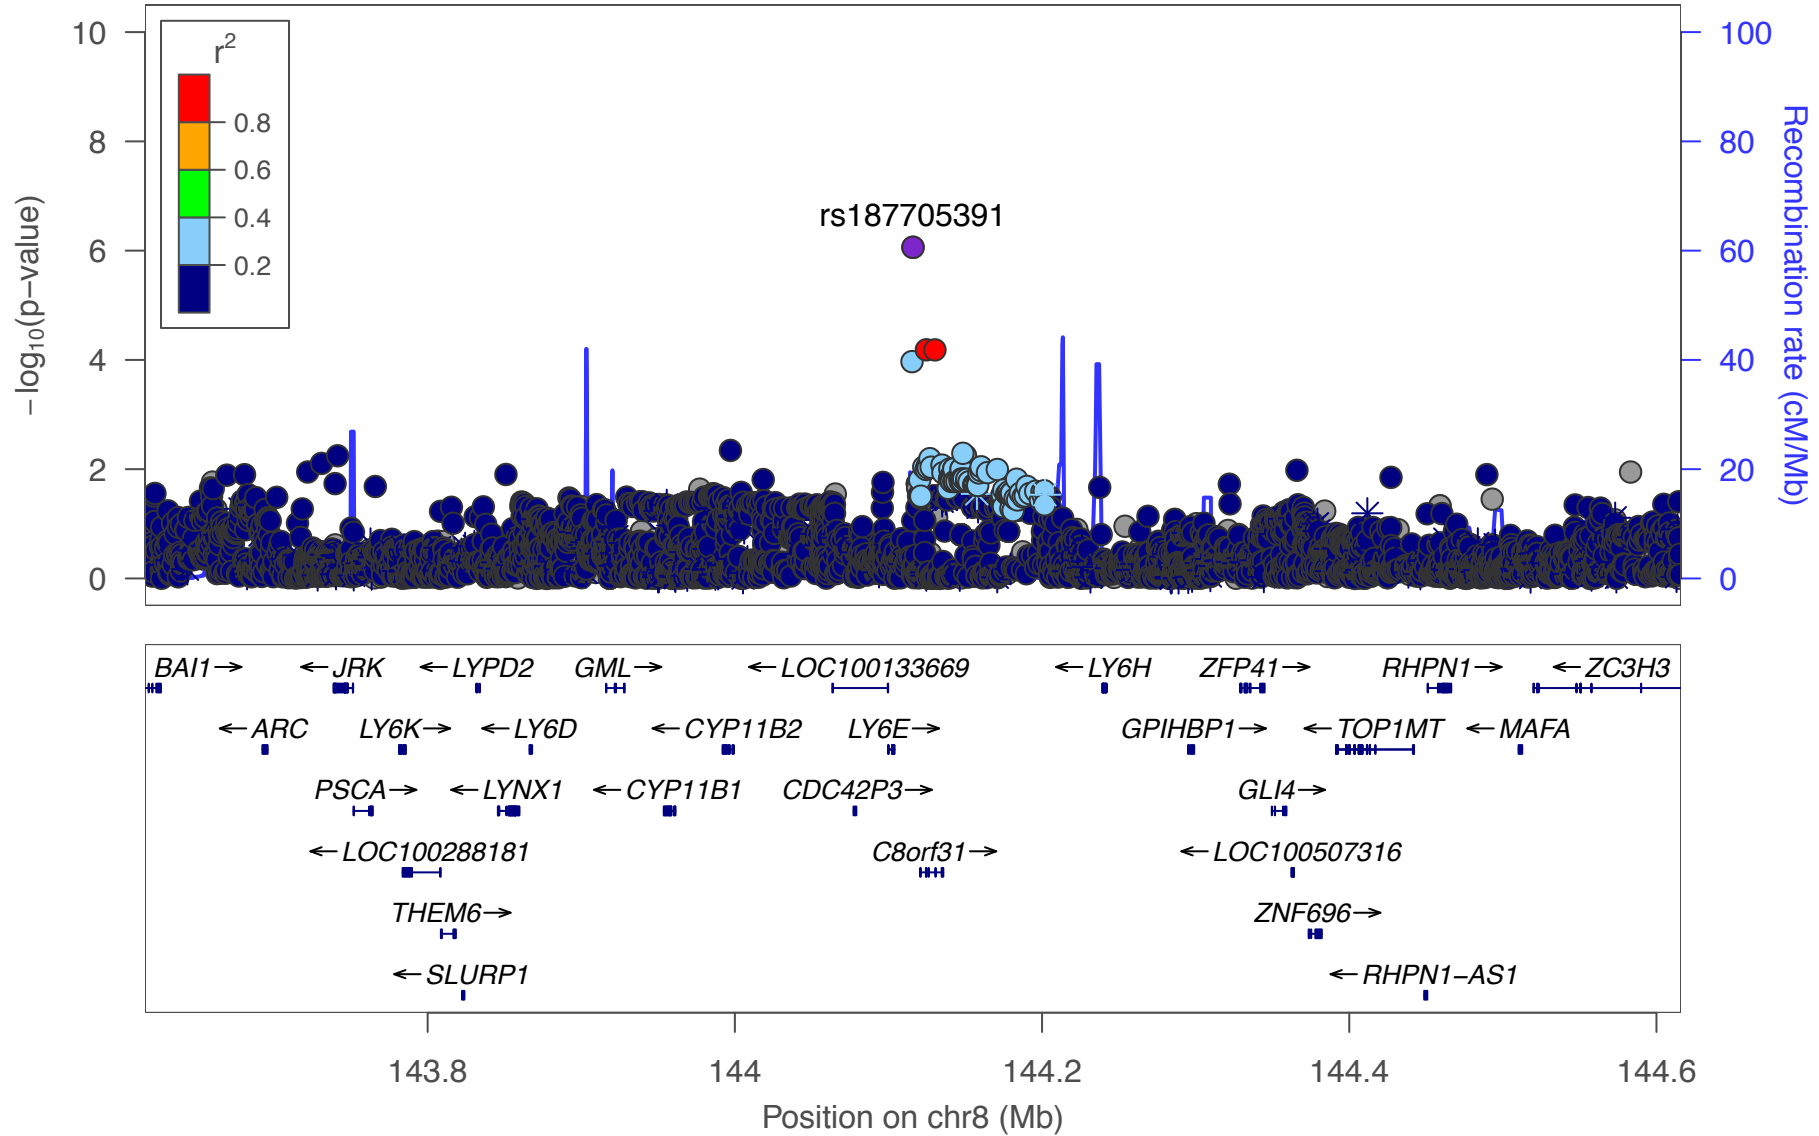

# meta.MCL

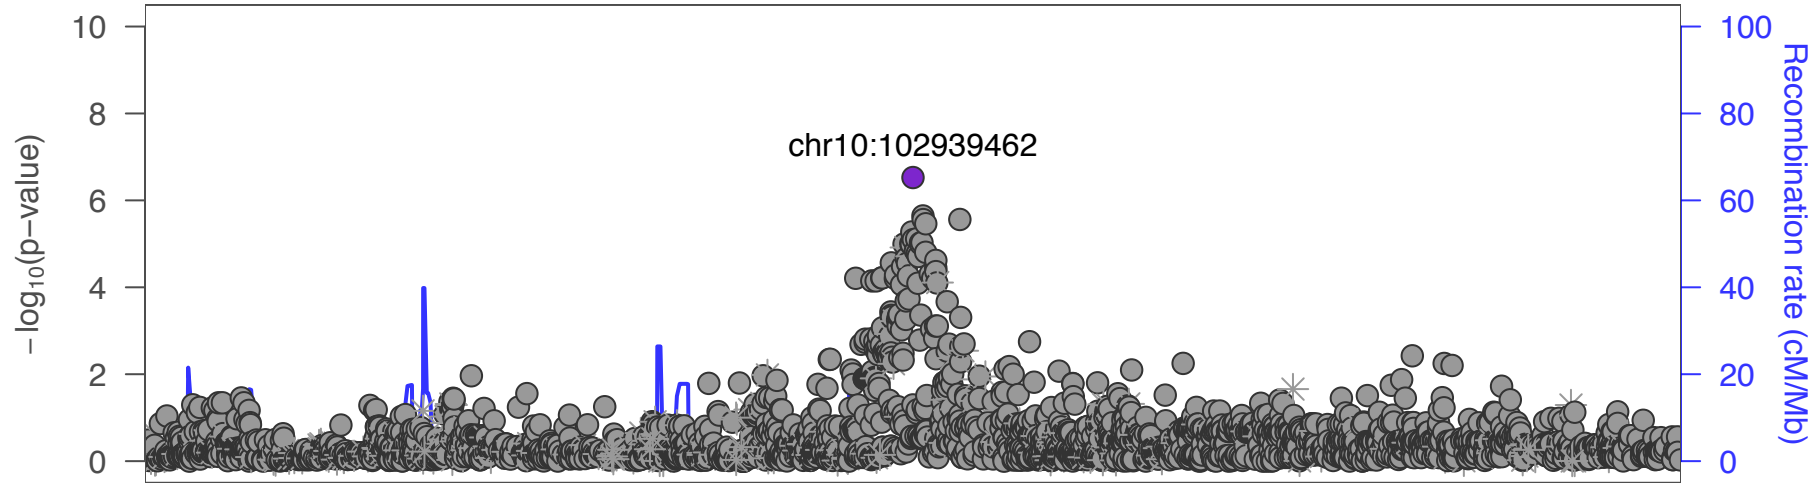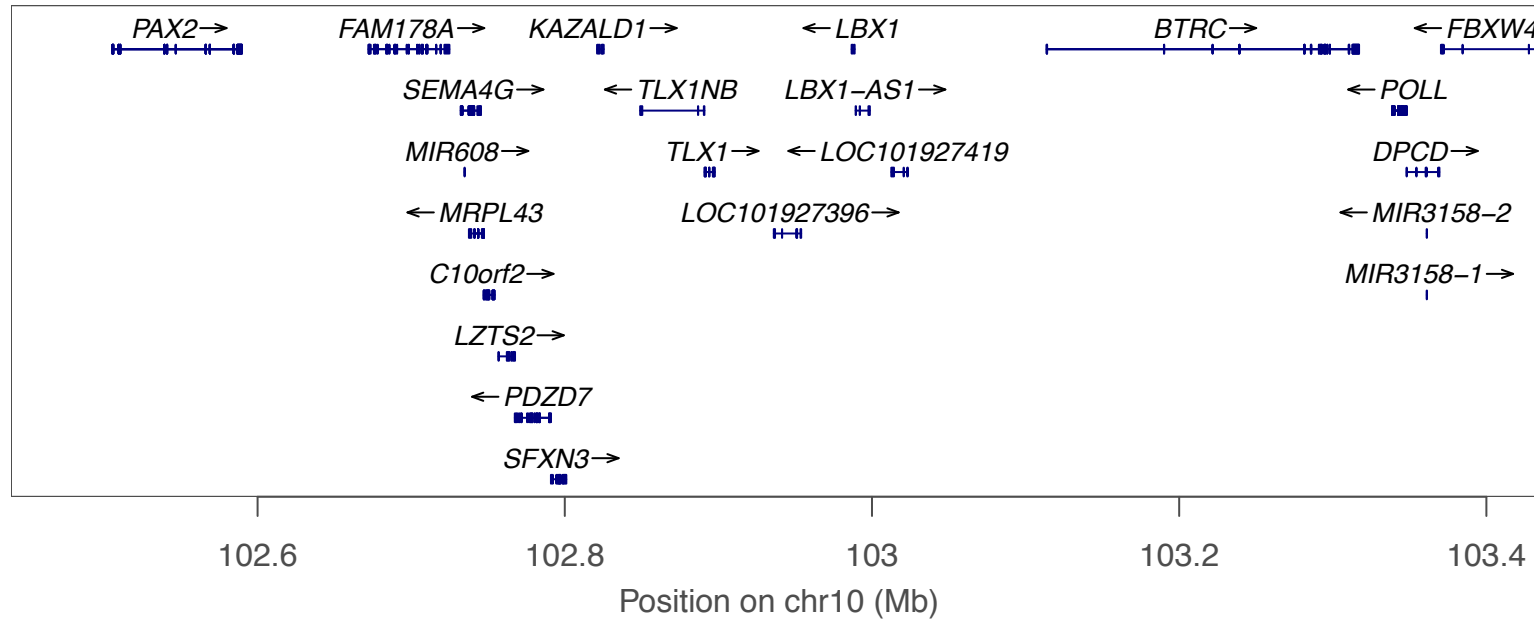

# meta.MCL

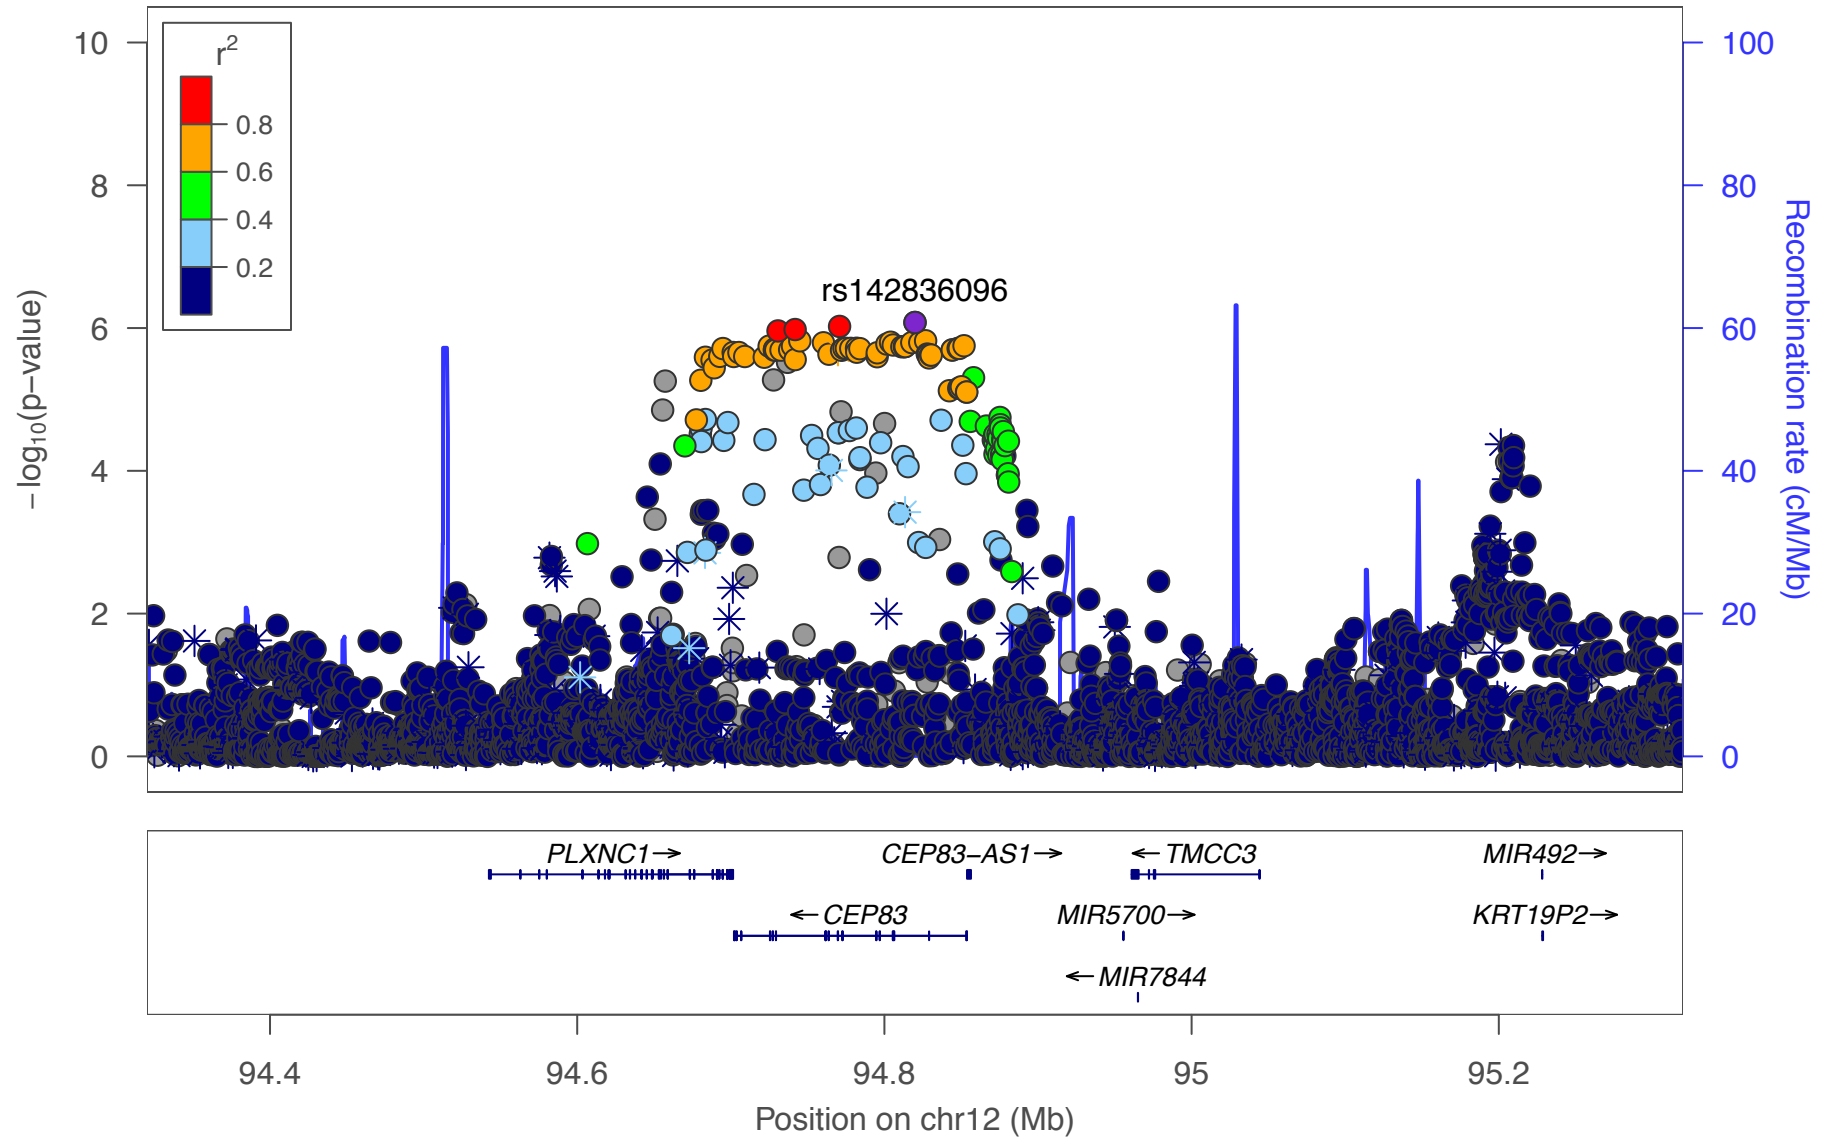

# meta.MCL

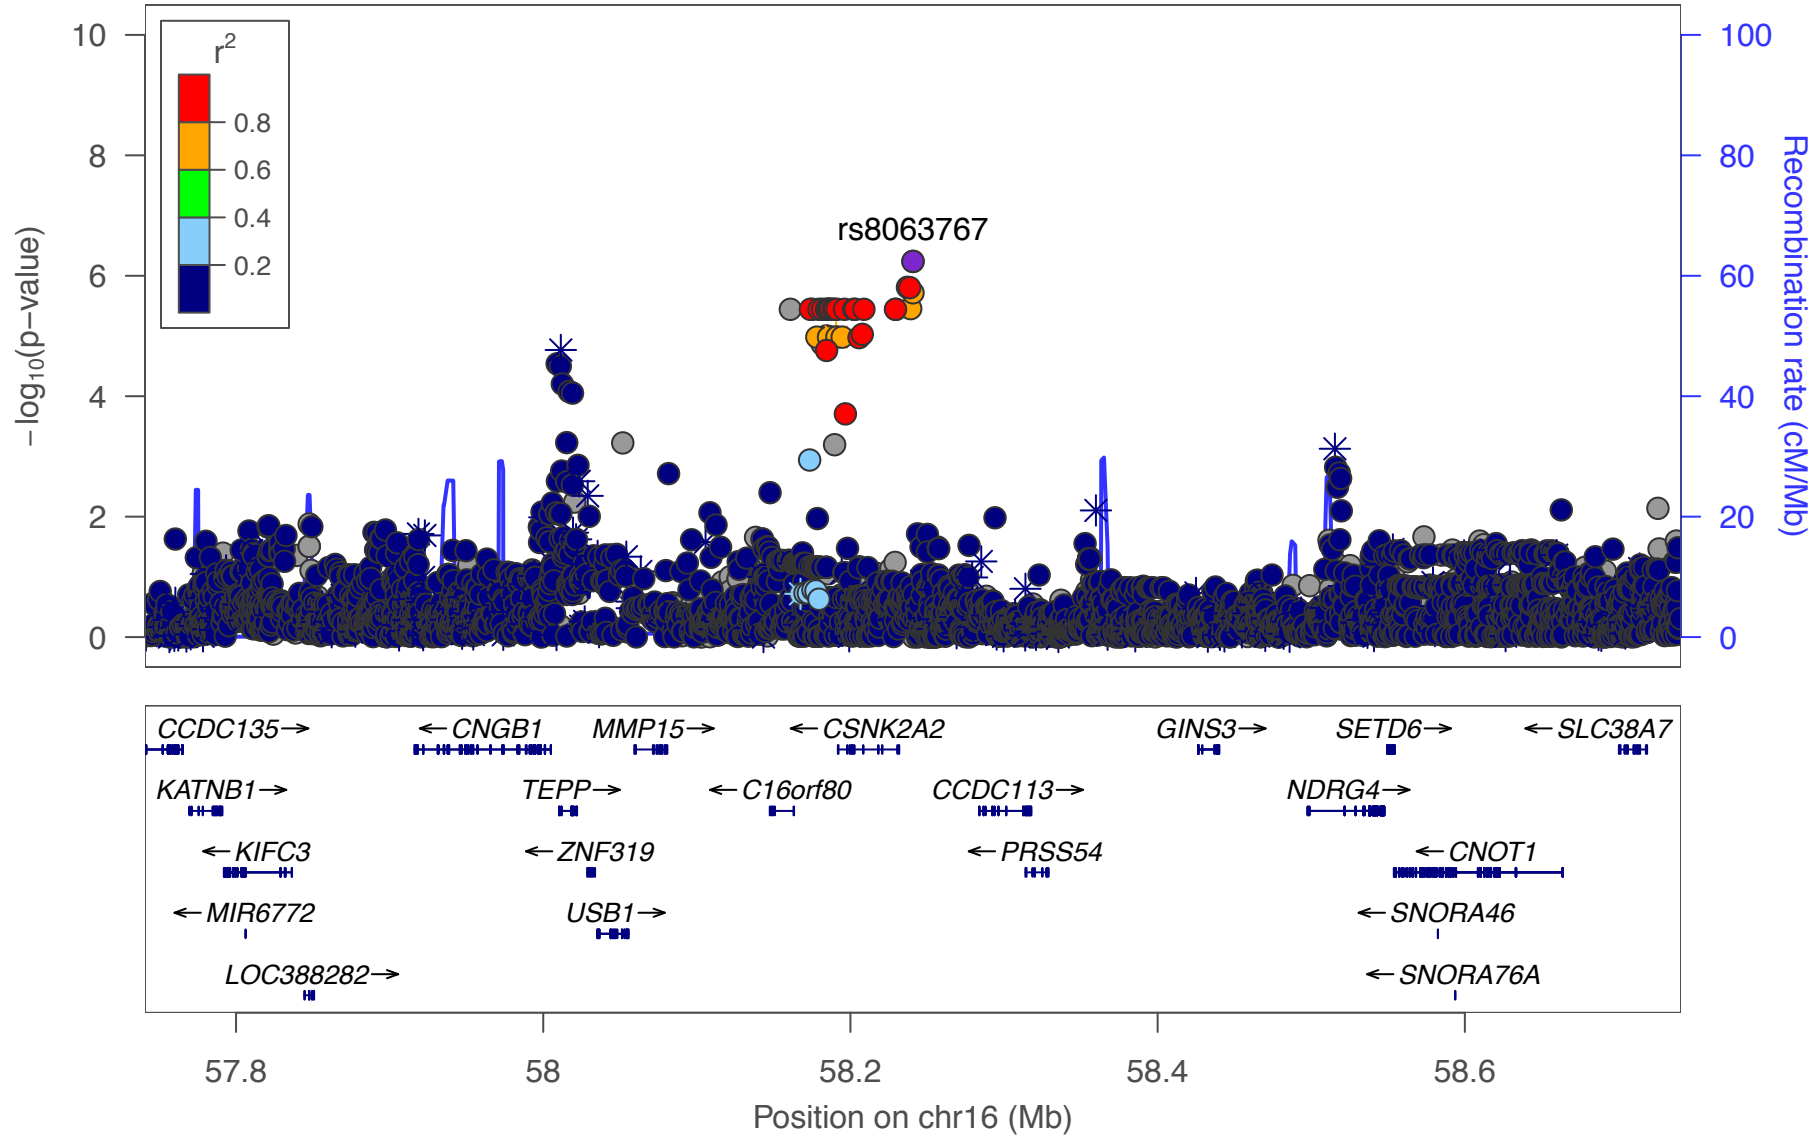

# meta.MCL

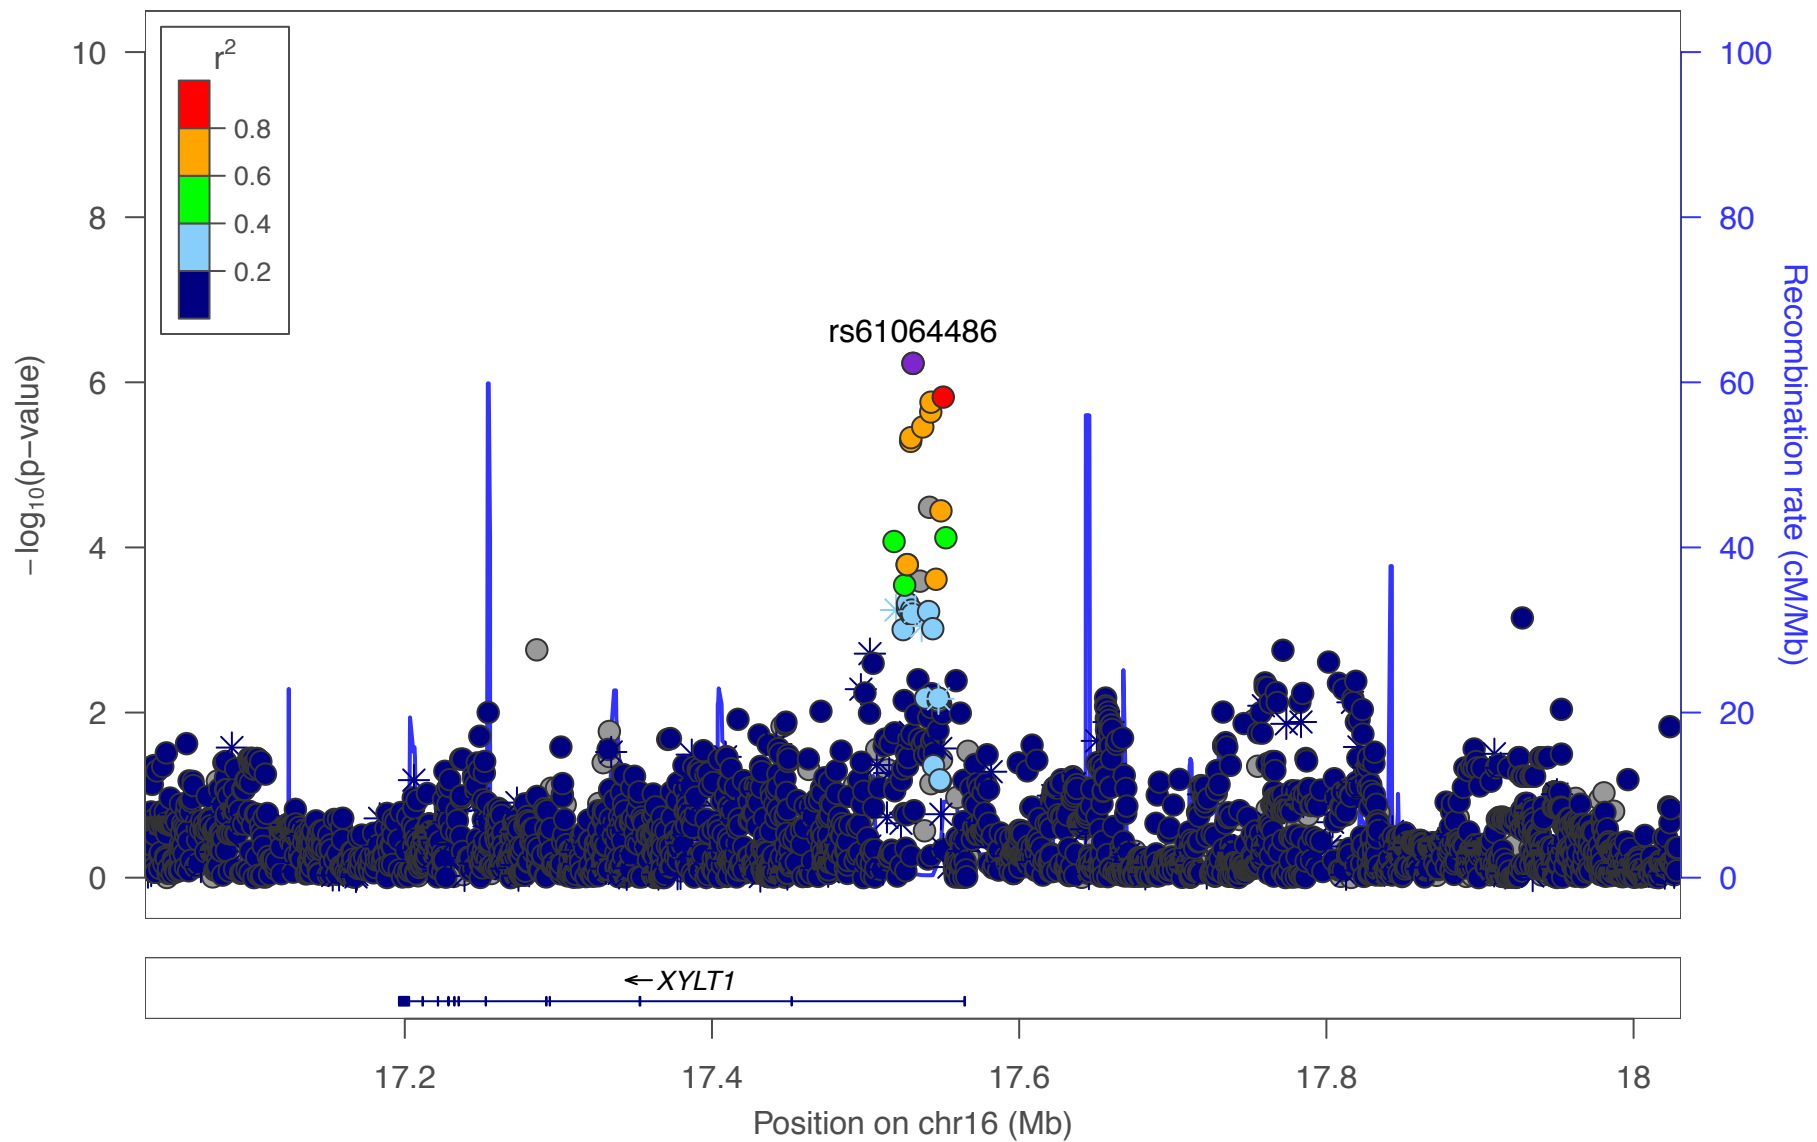

# meta.MCL

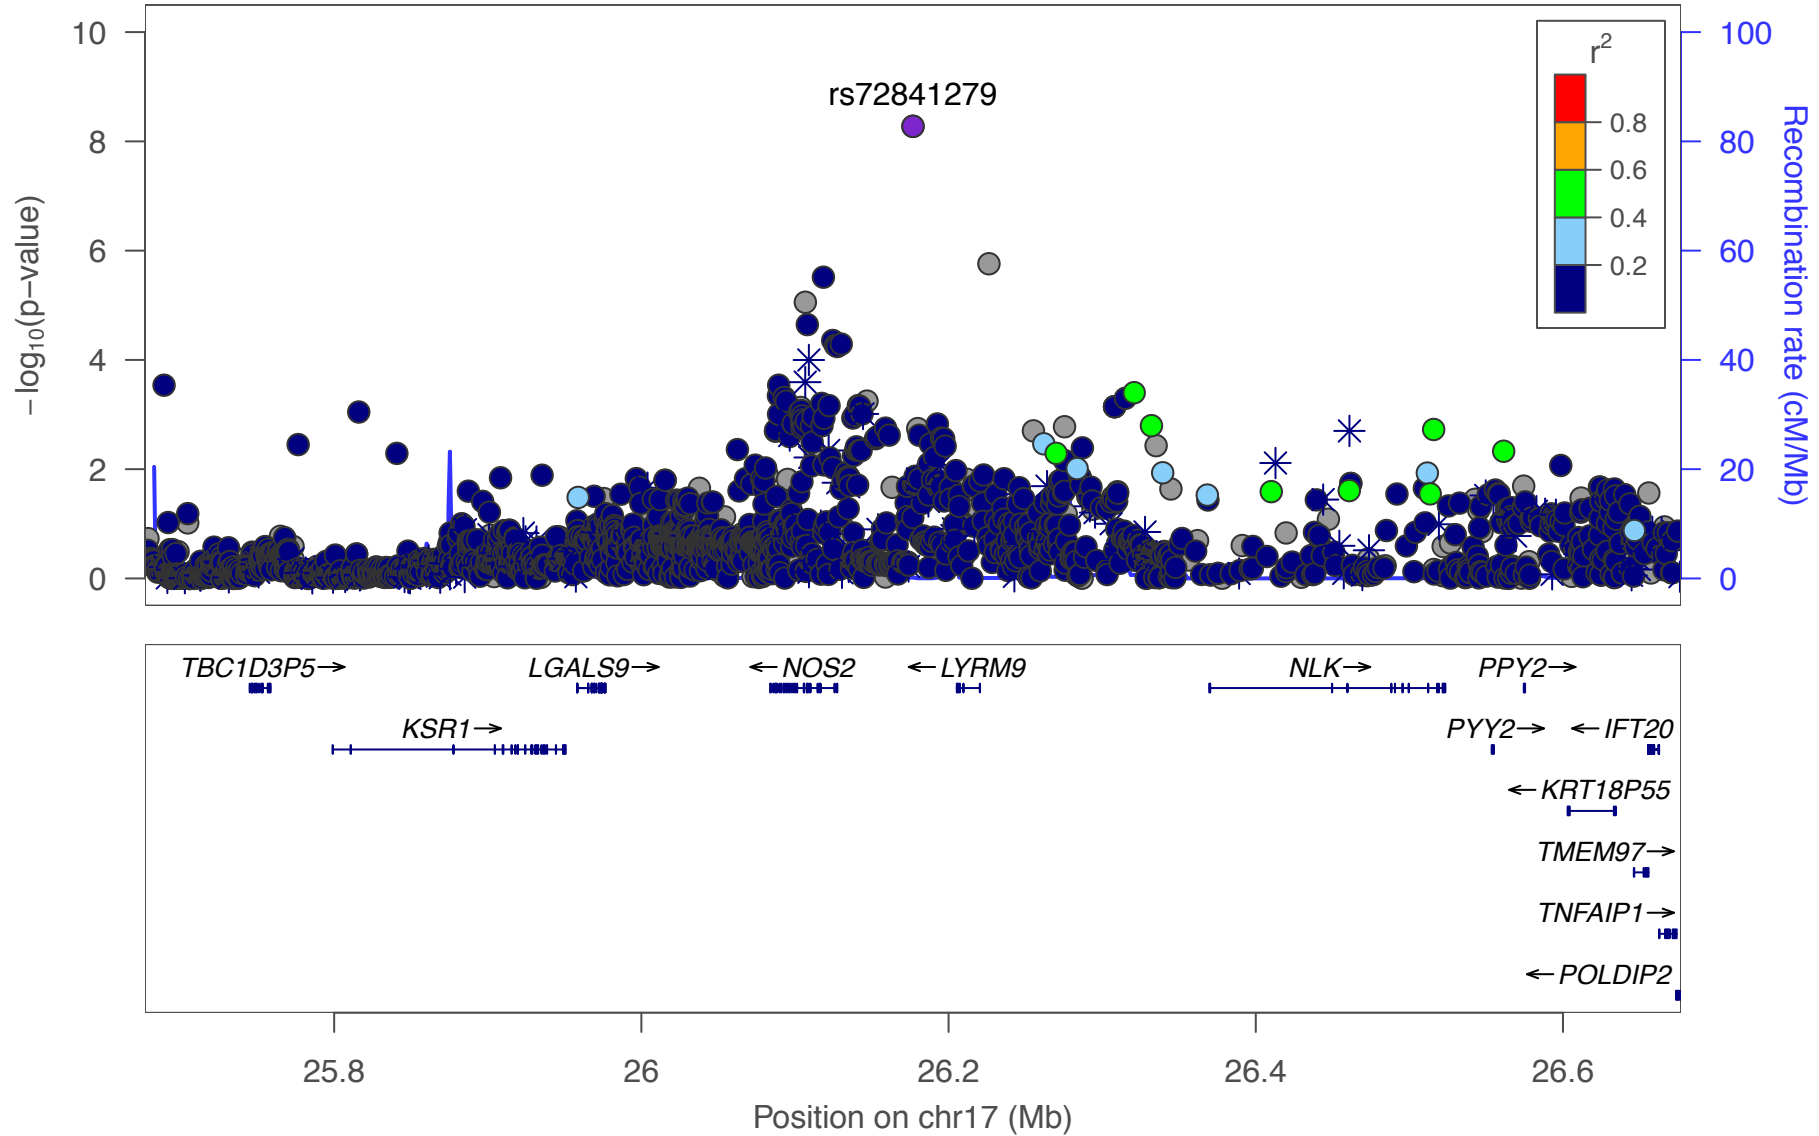

# meta.CI

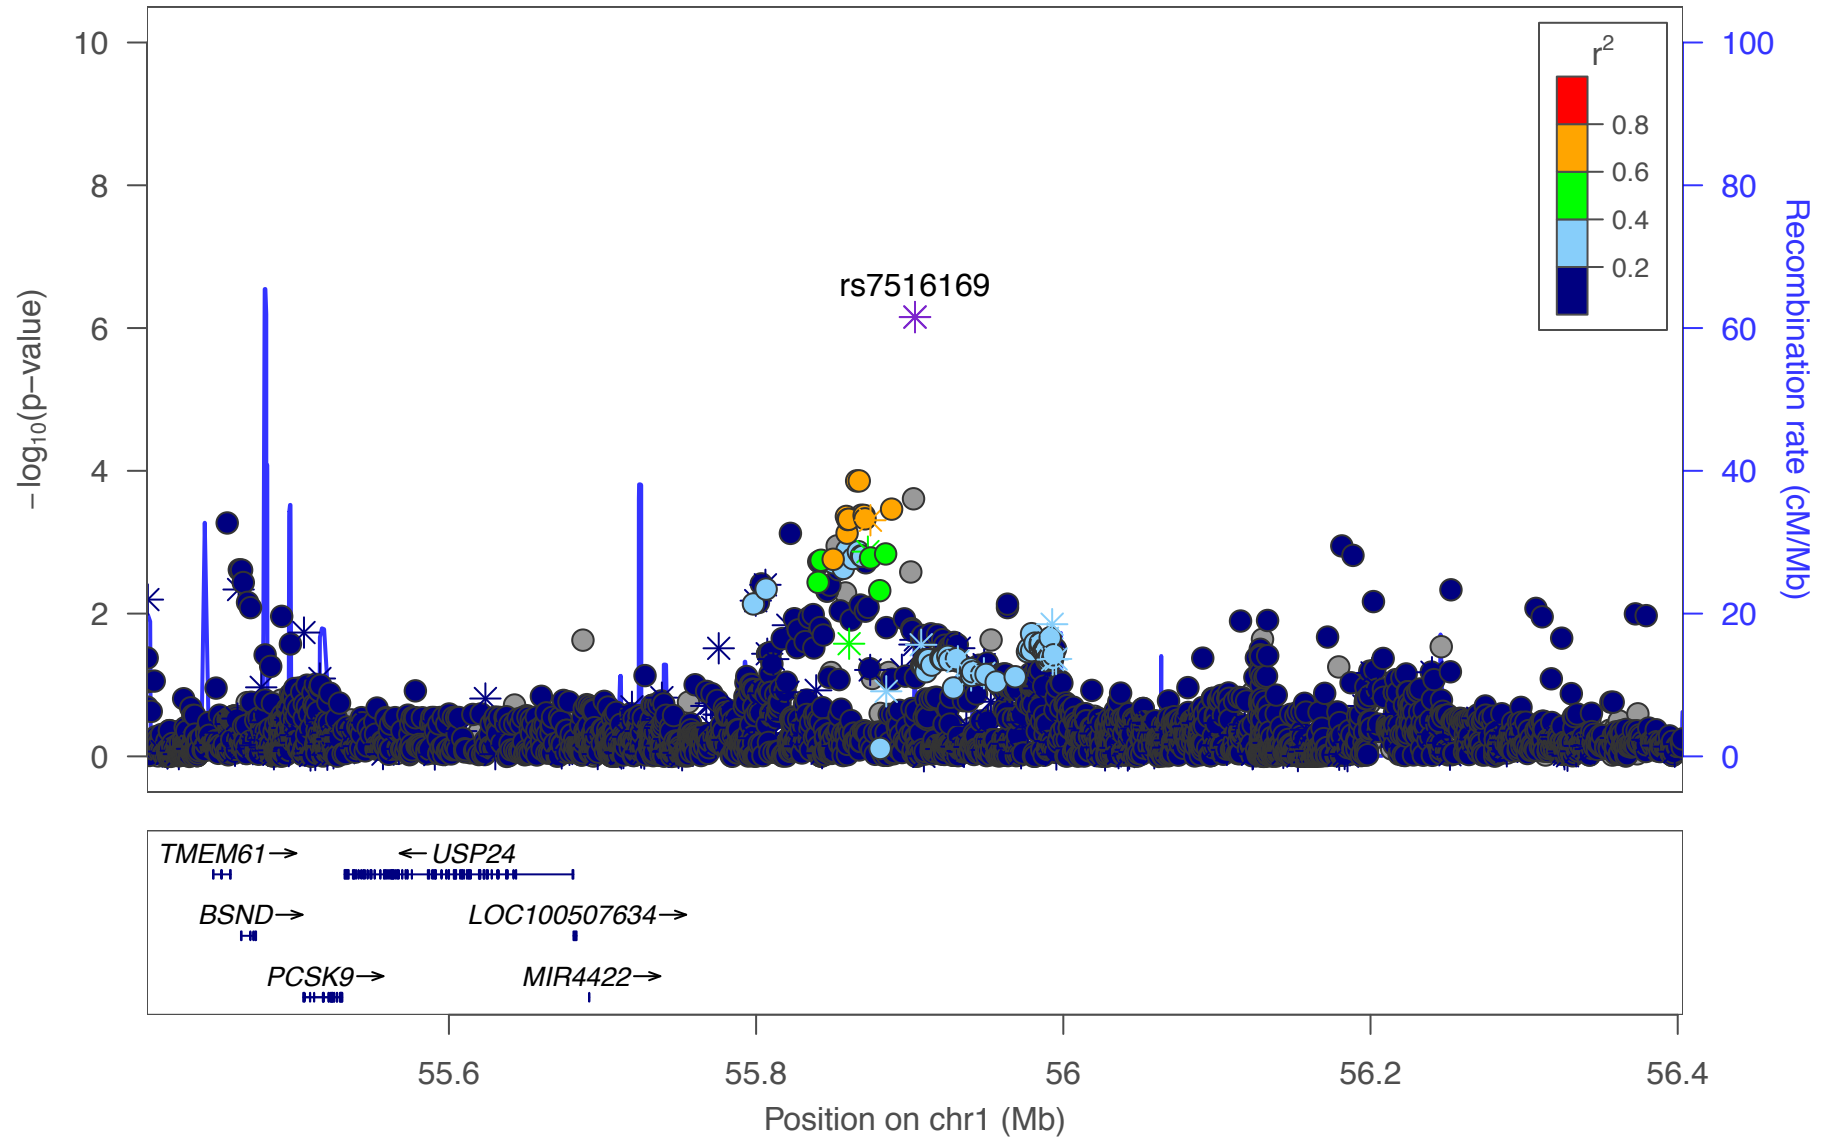

Supplement: pone.0196148.s012.pdf [file pone.0196148.s012.pdf]
