# Supplementary material for: Mapping genetic variants for cranial vault shape in humans
Source: PubMed Central journal article supplement (PMC5919379; doi:10.1371/journal.pone.0196148), 2018-04-26

Figure S4

# OFC.MCW

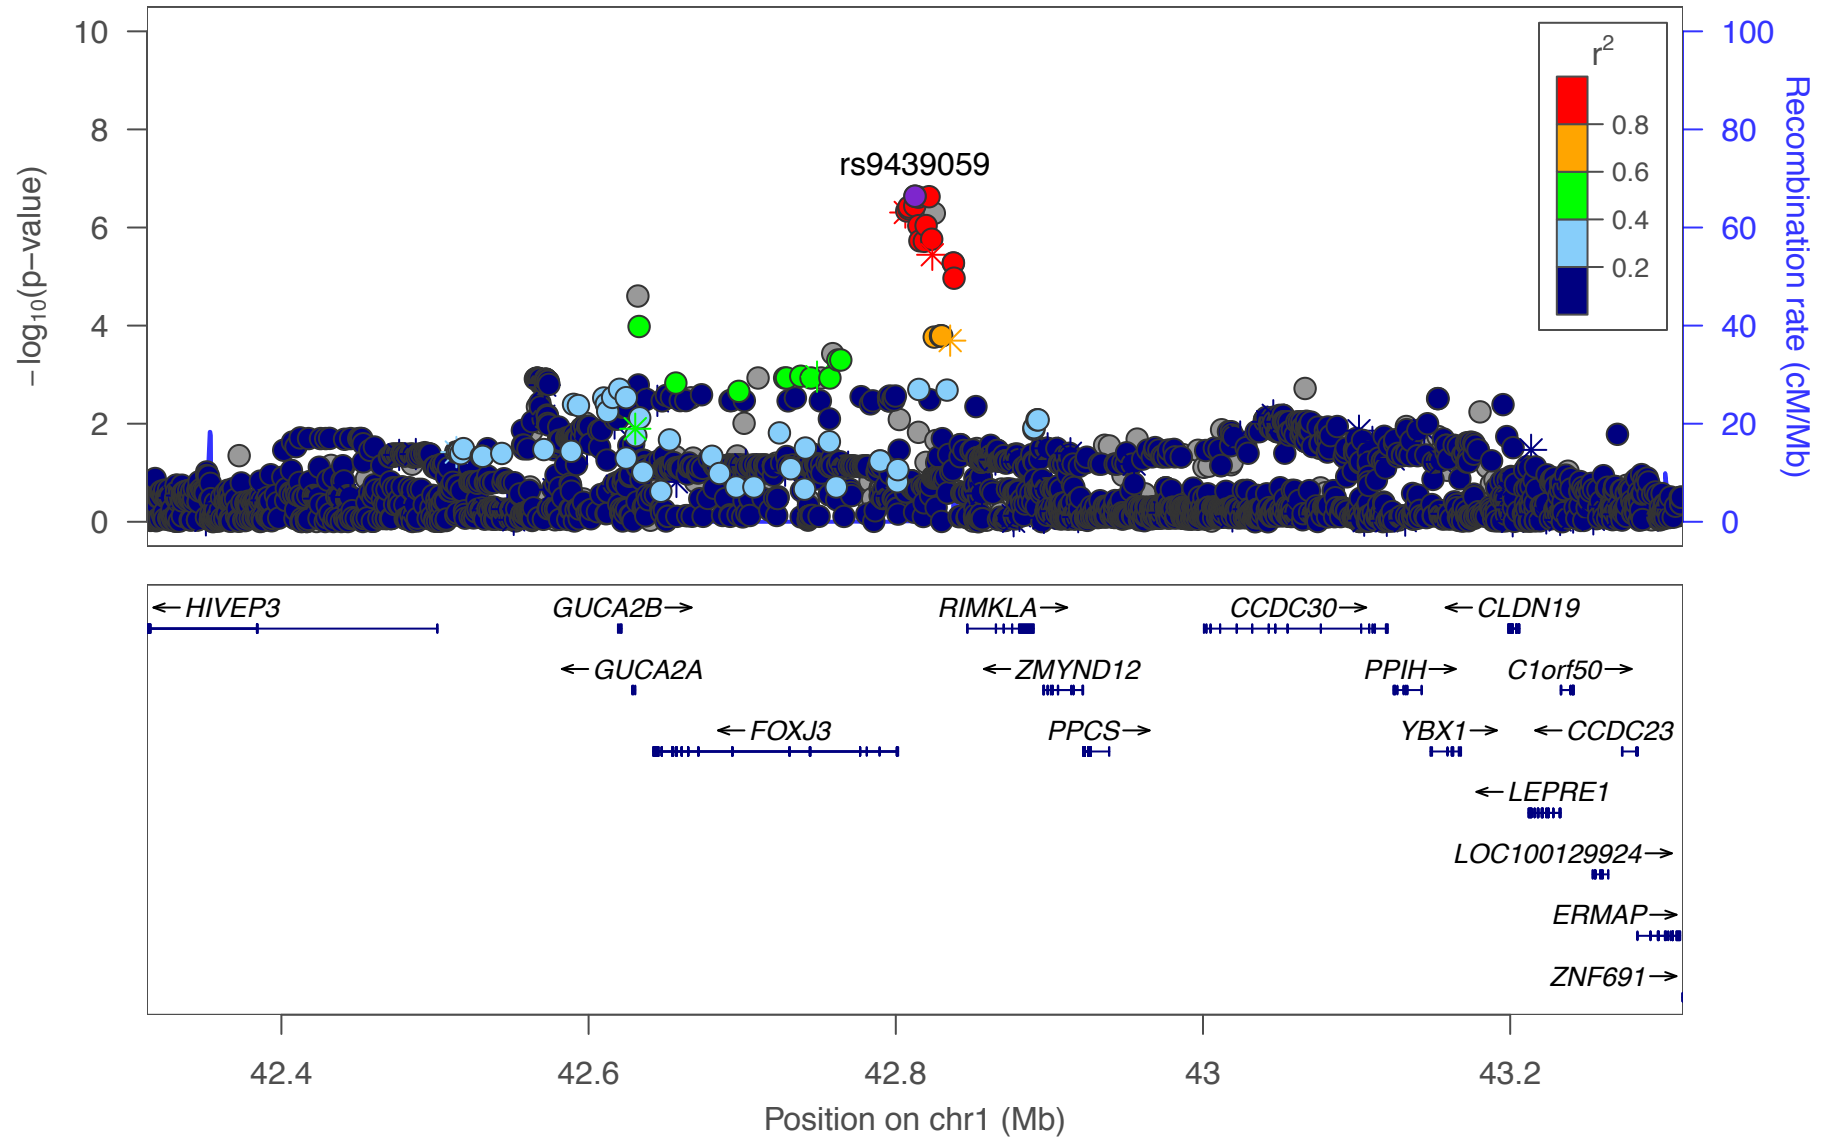

# OFC.MCW

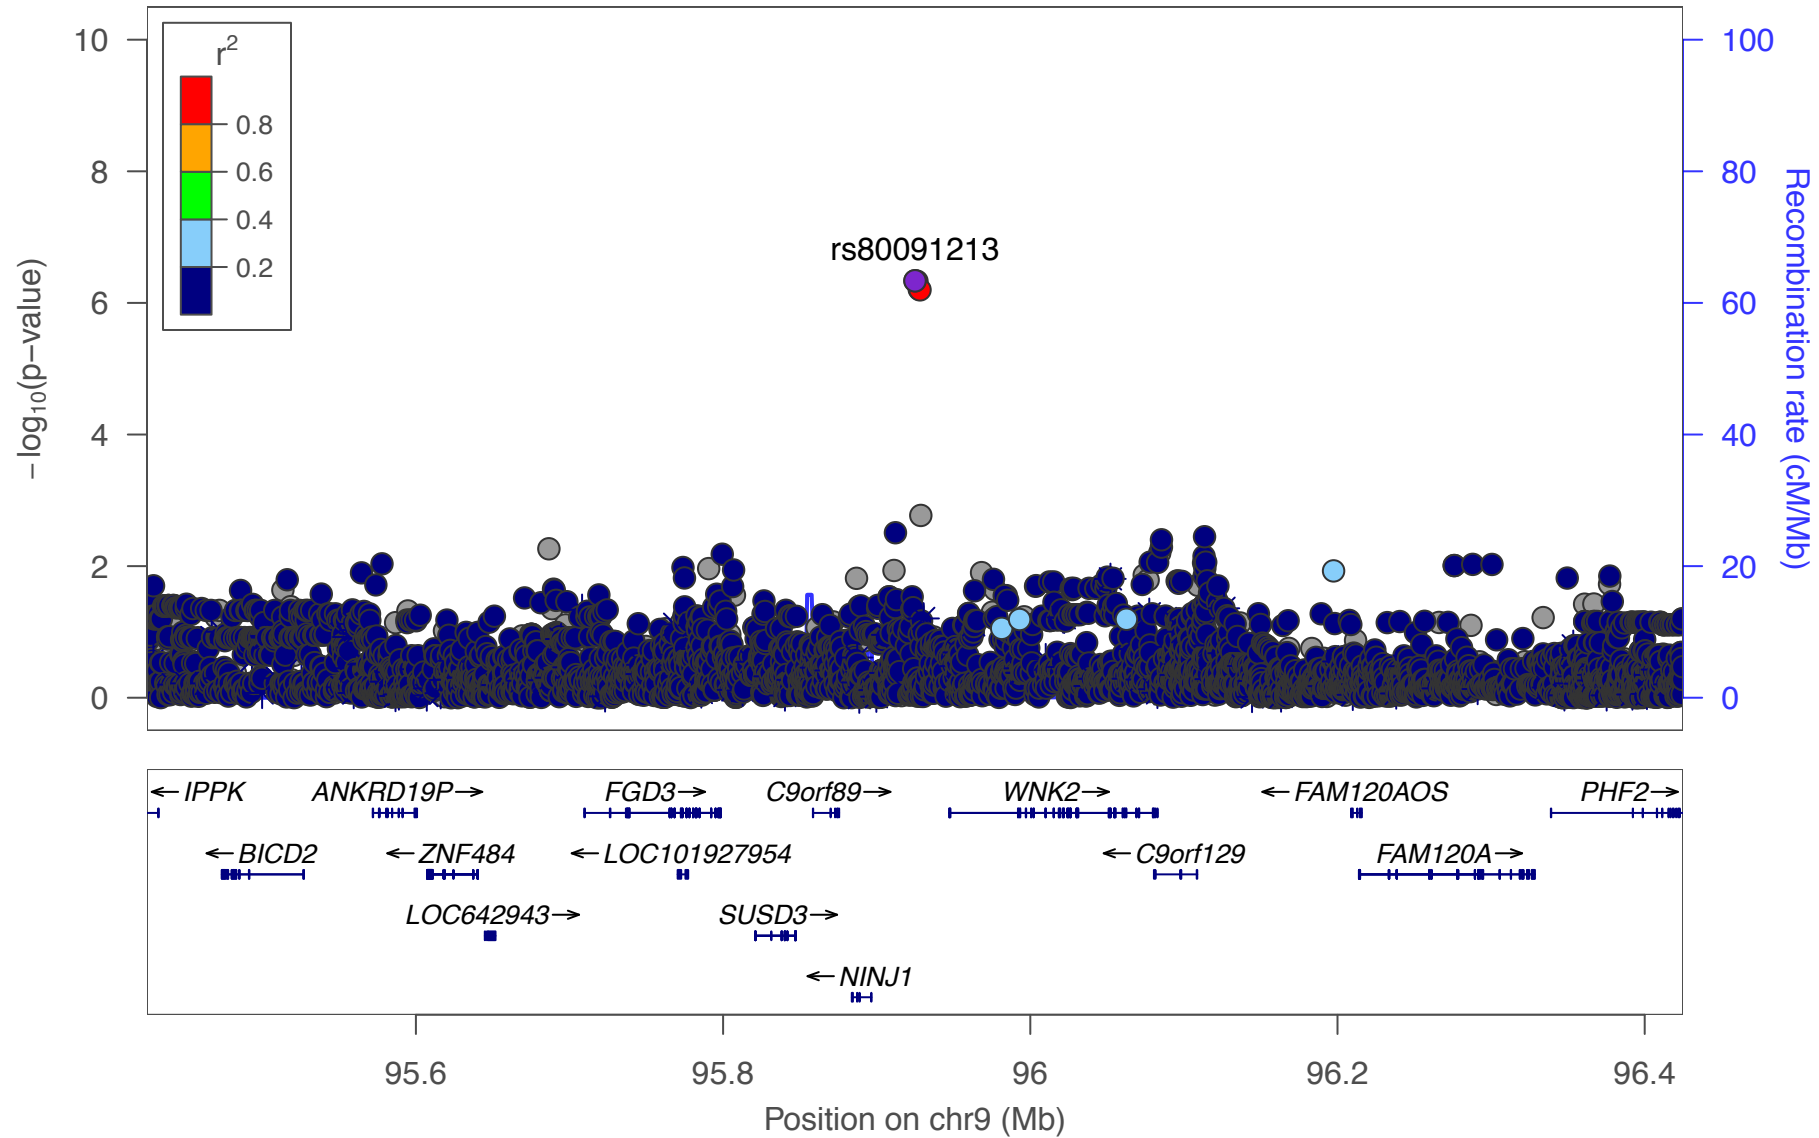

# OFC.MCW

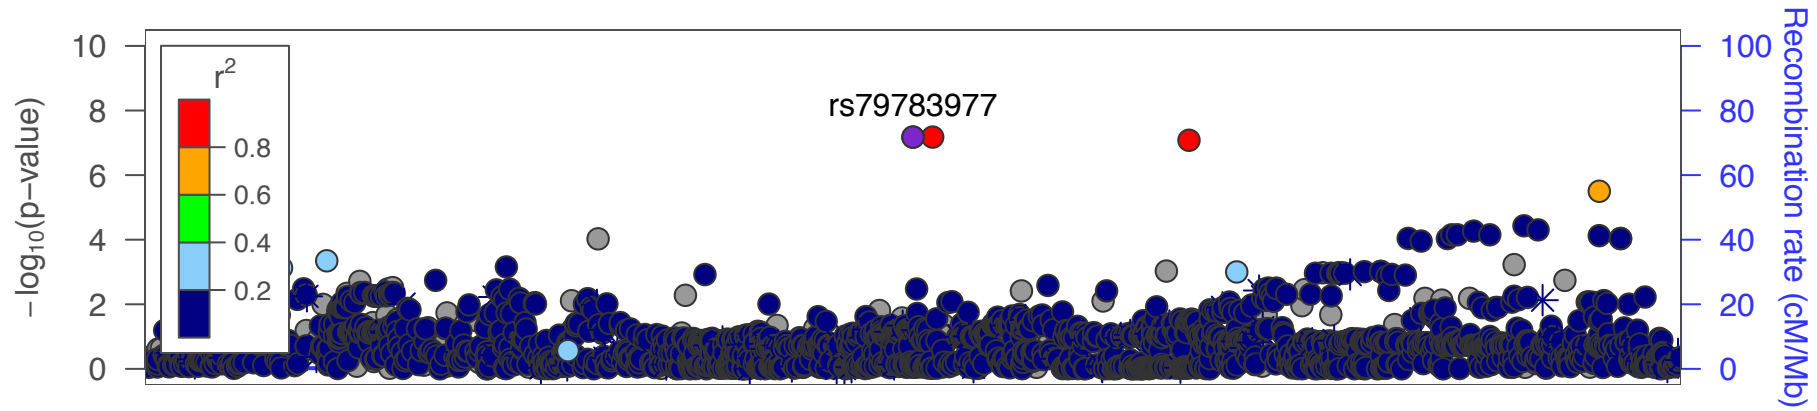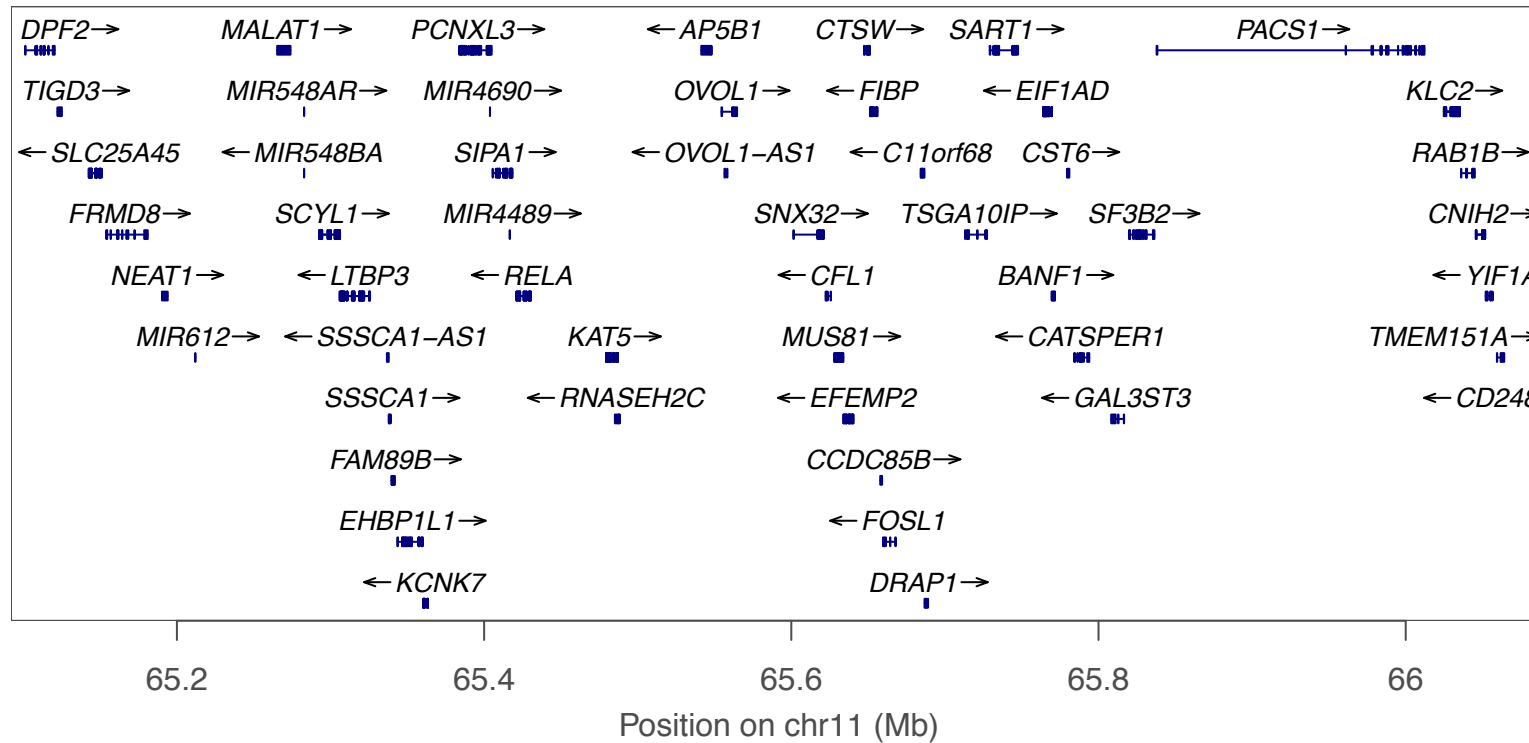

# OFC.MCW

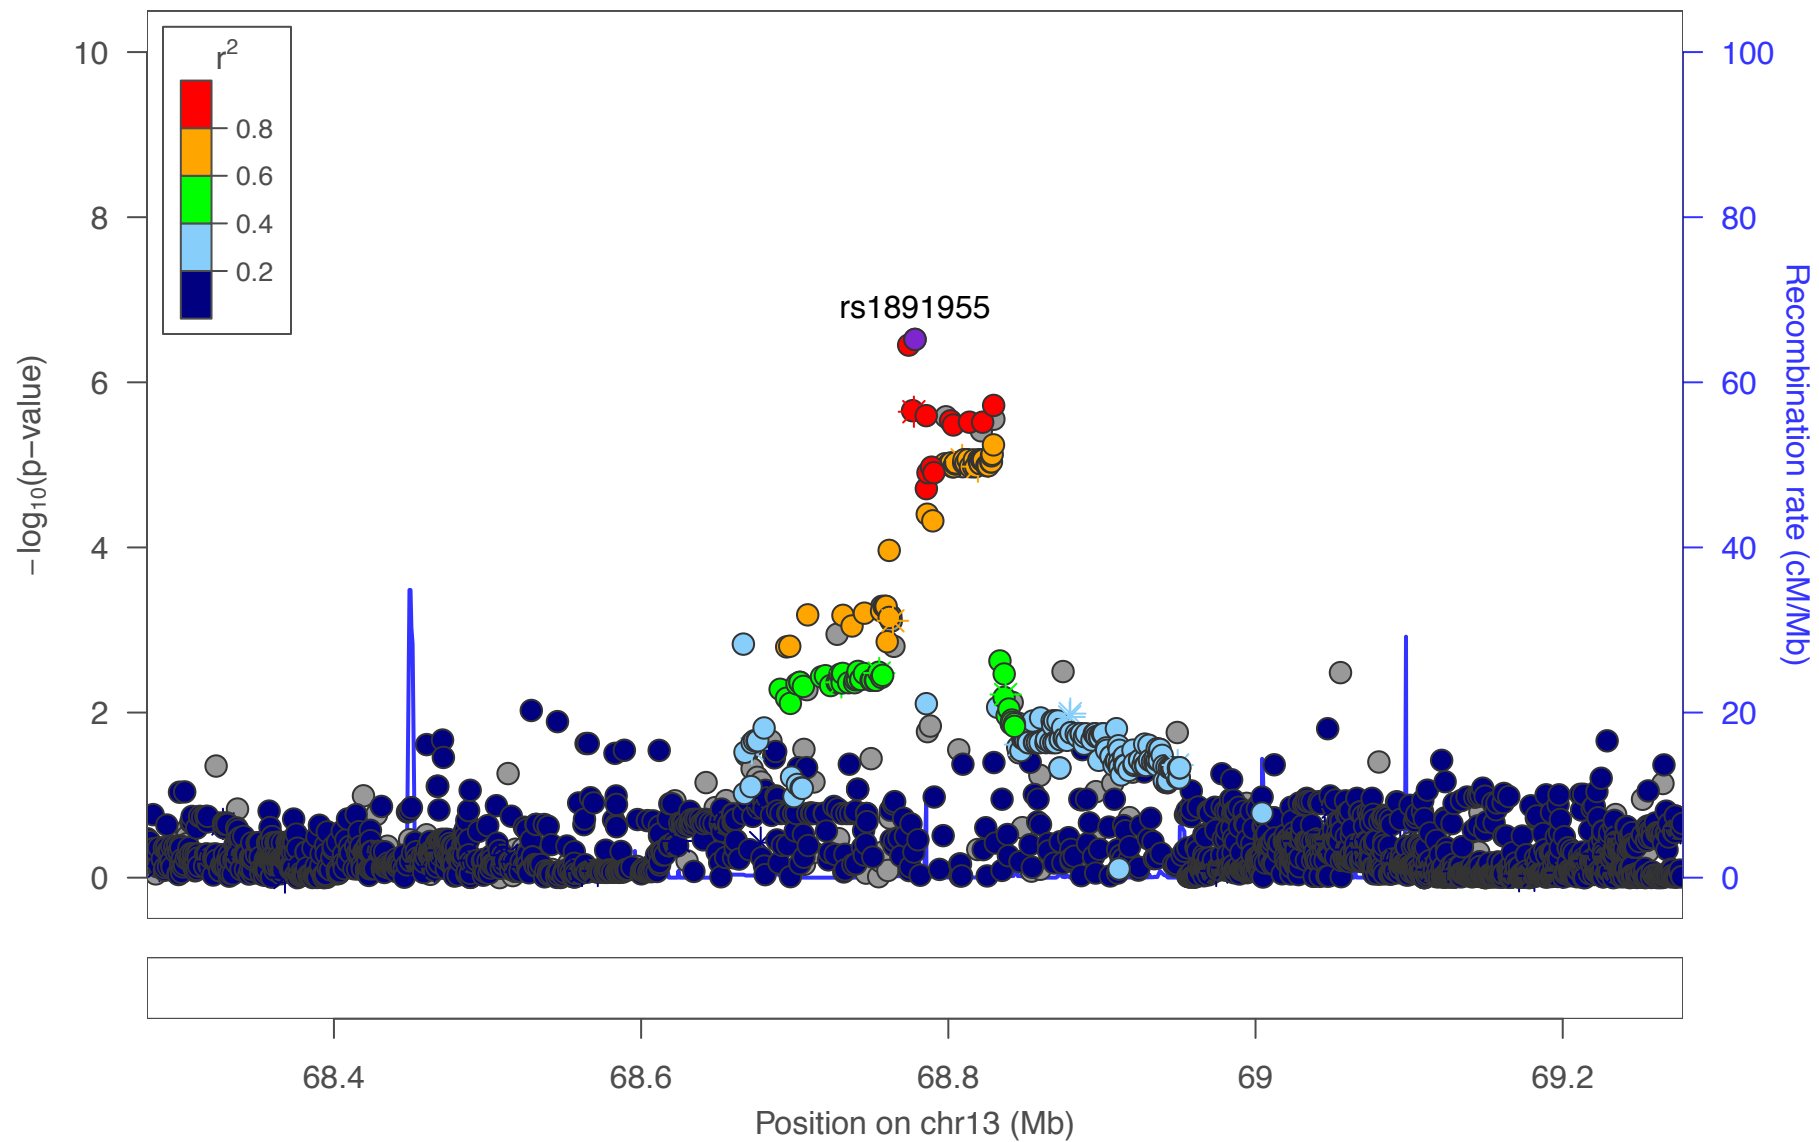

# OFC.MCW

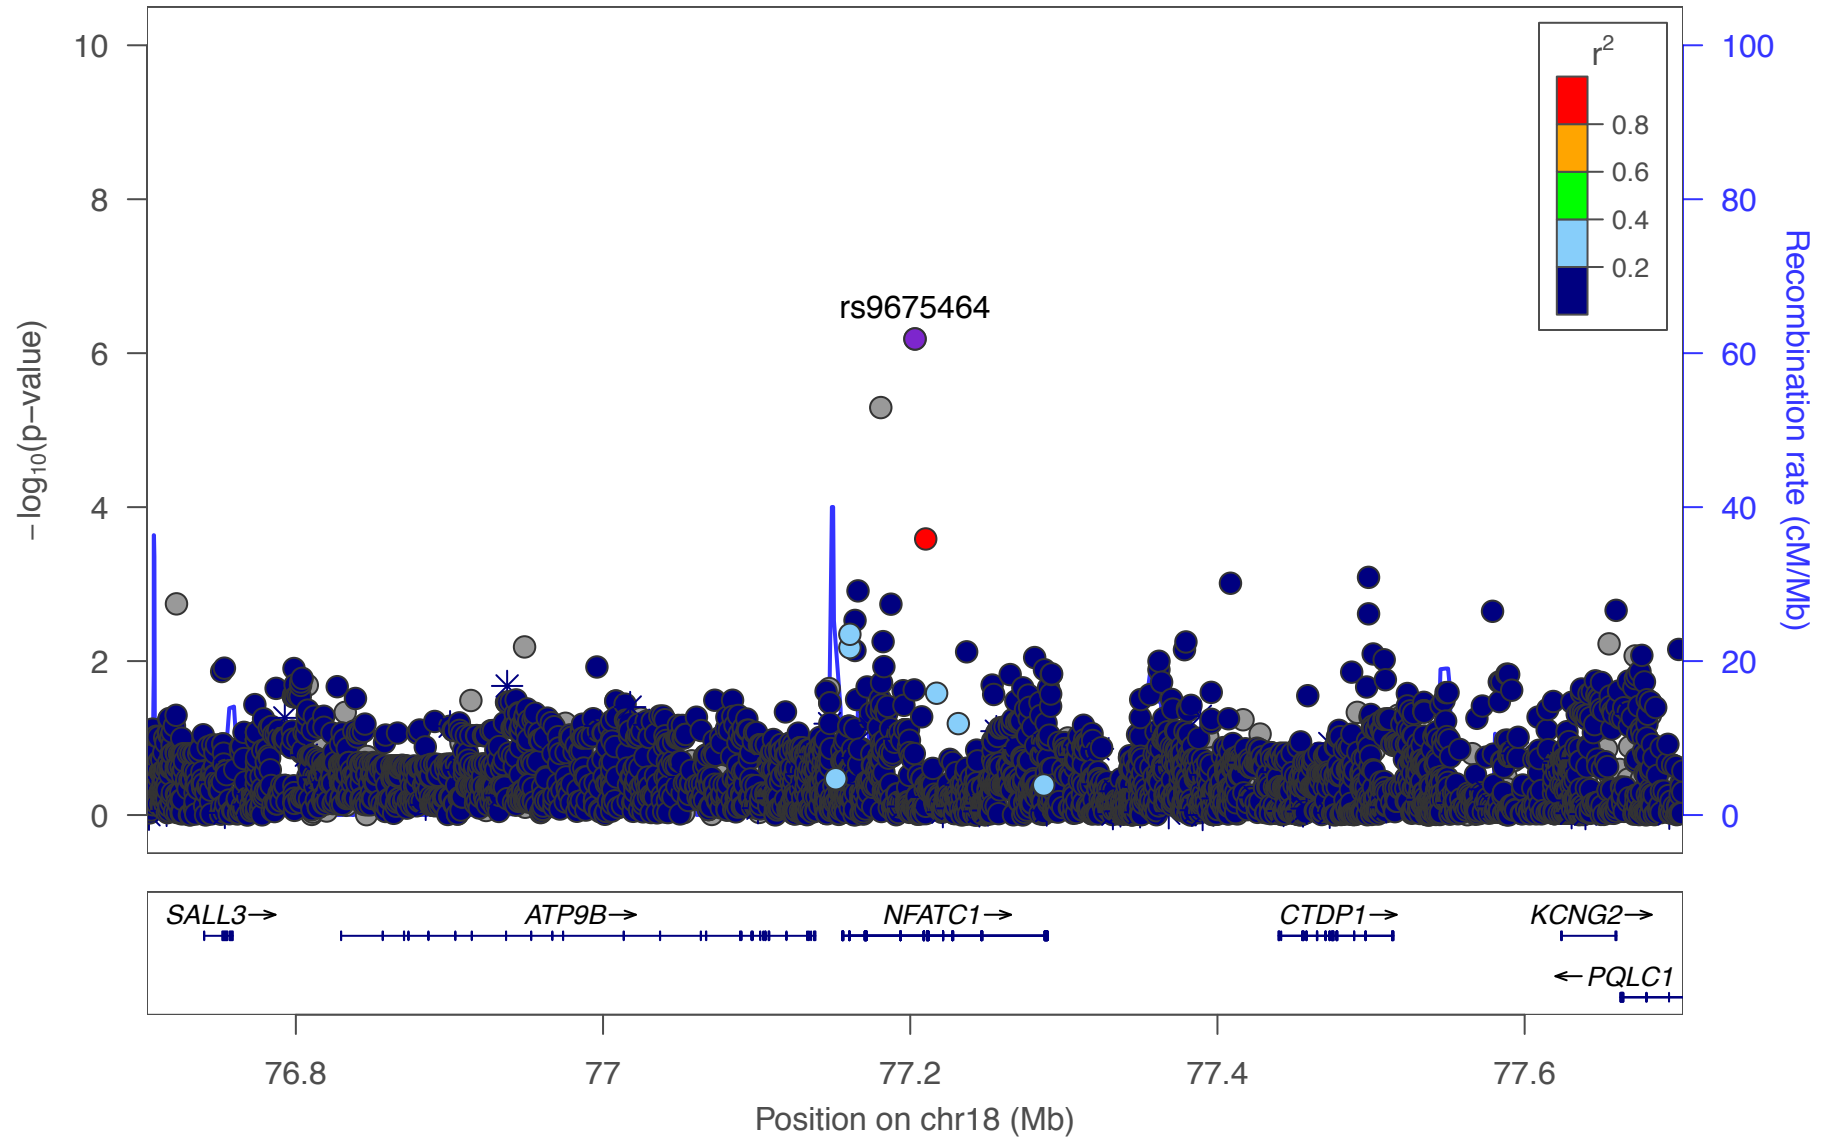

# OFC.MCL

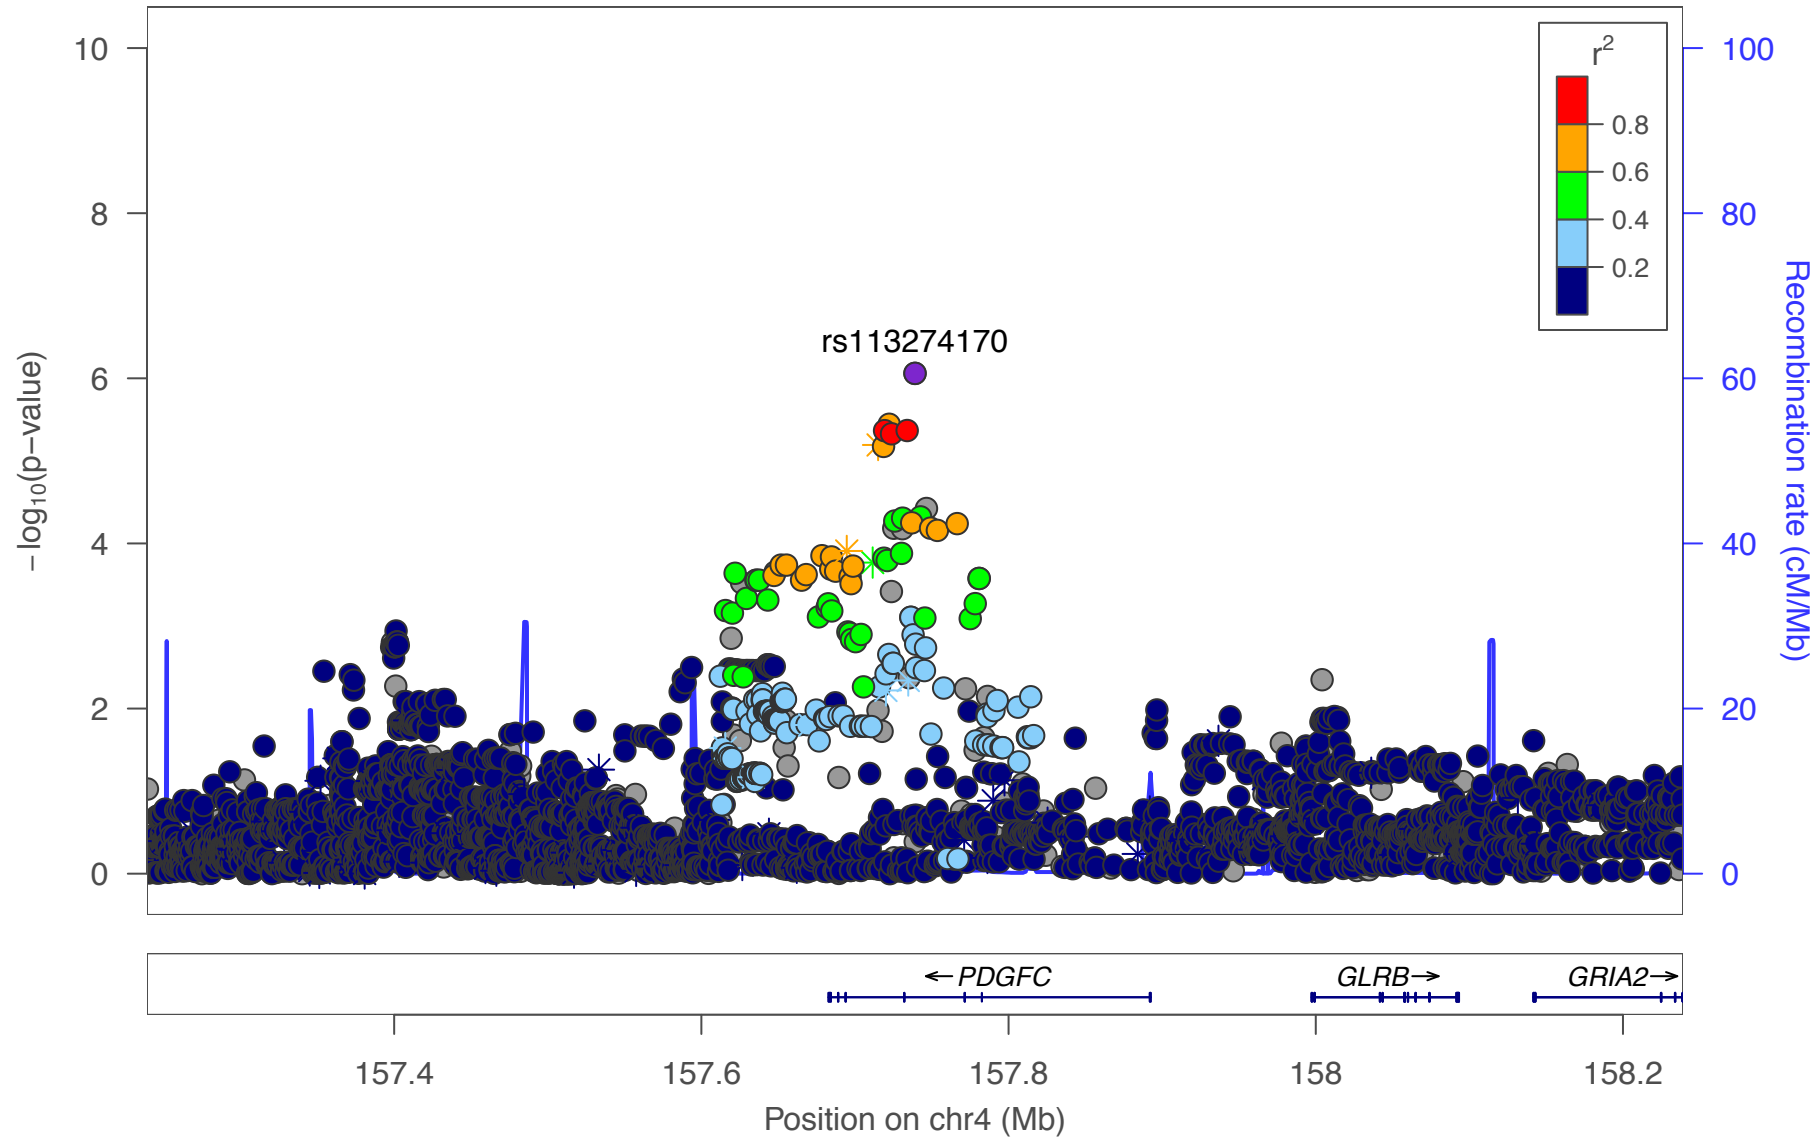

# OFC.MCL

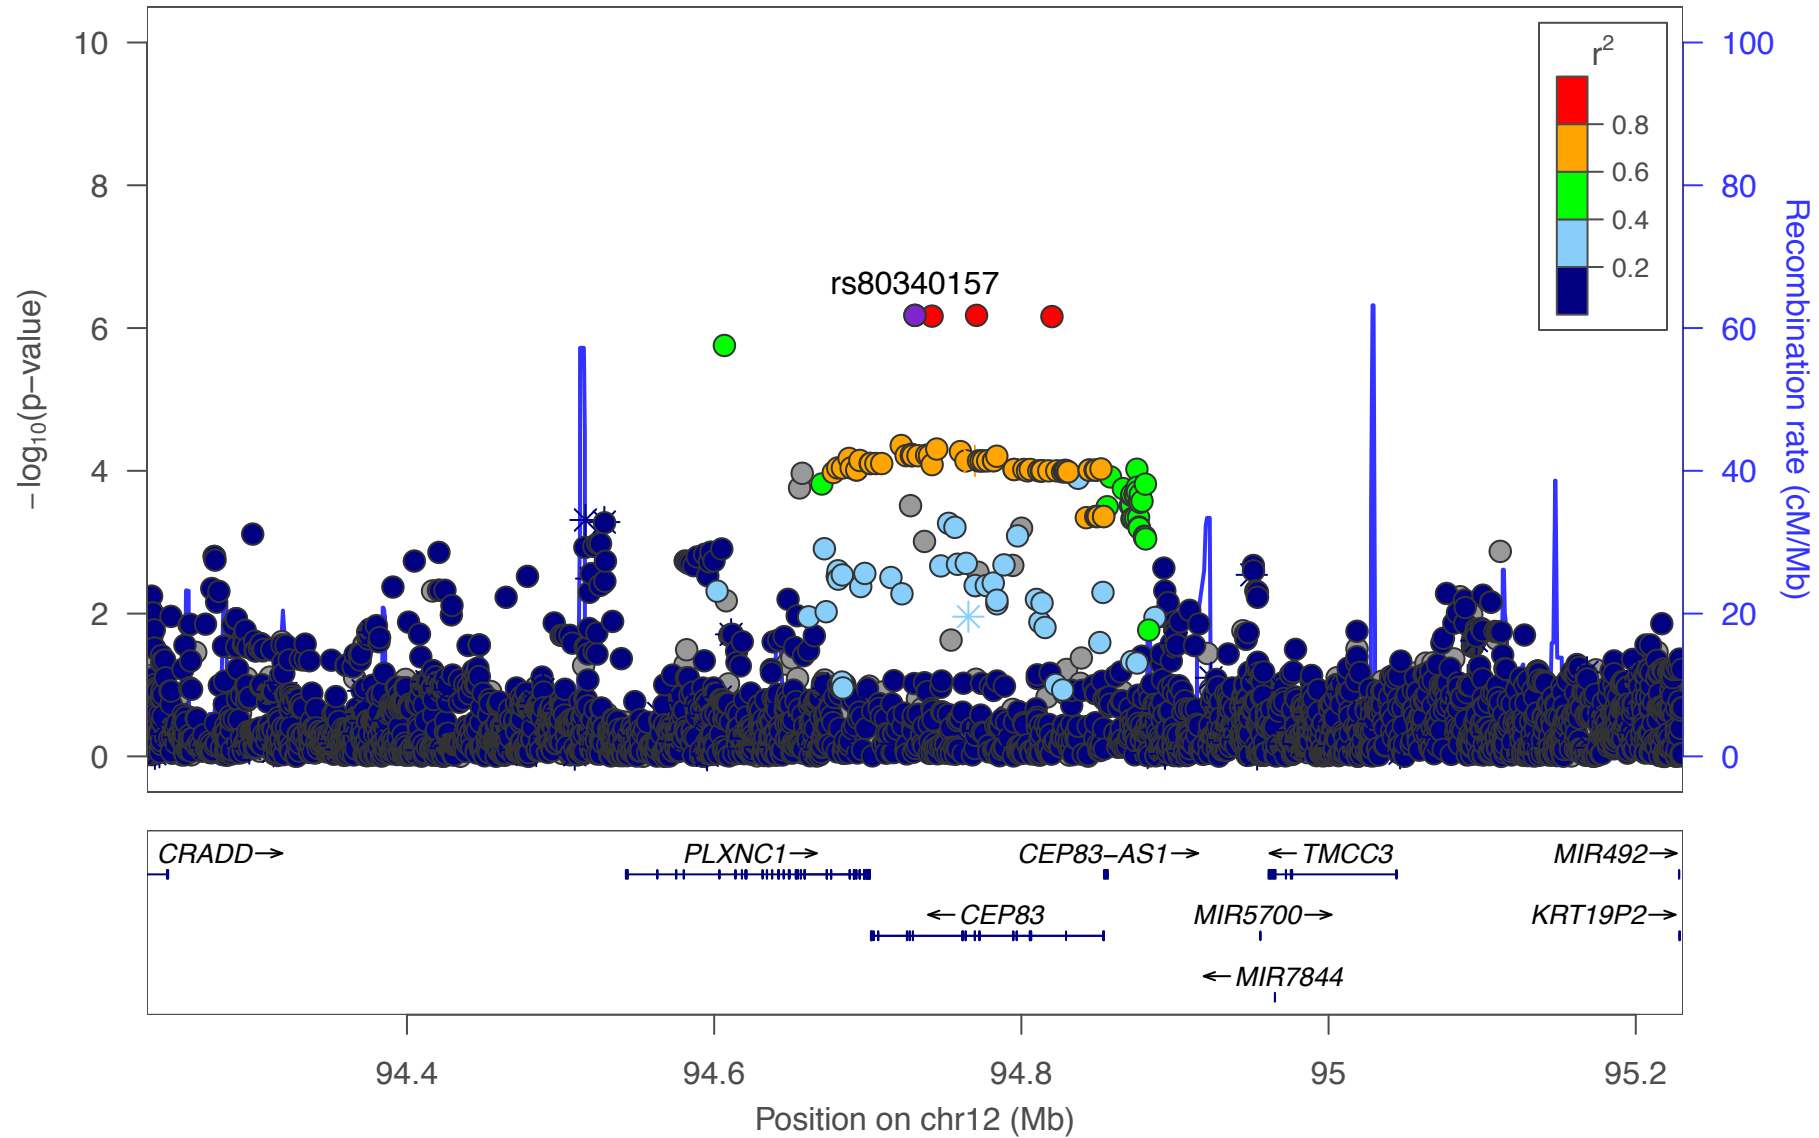

# OFC.MCL

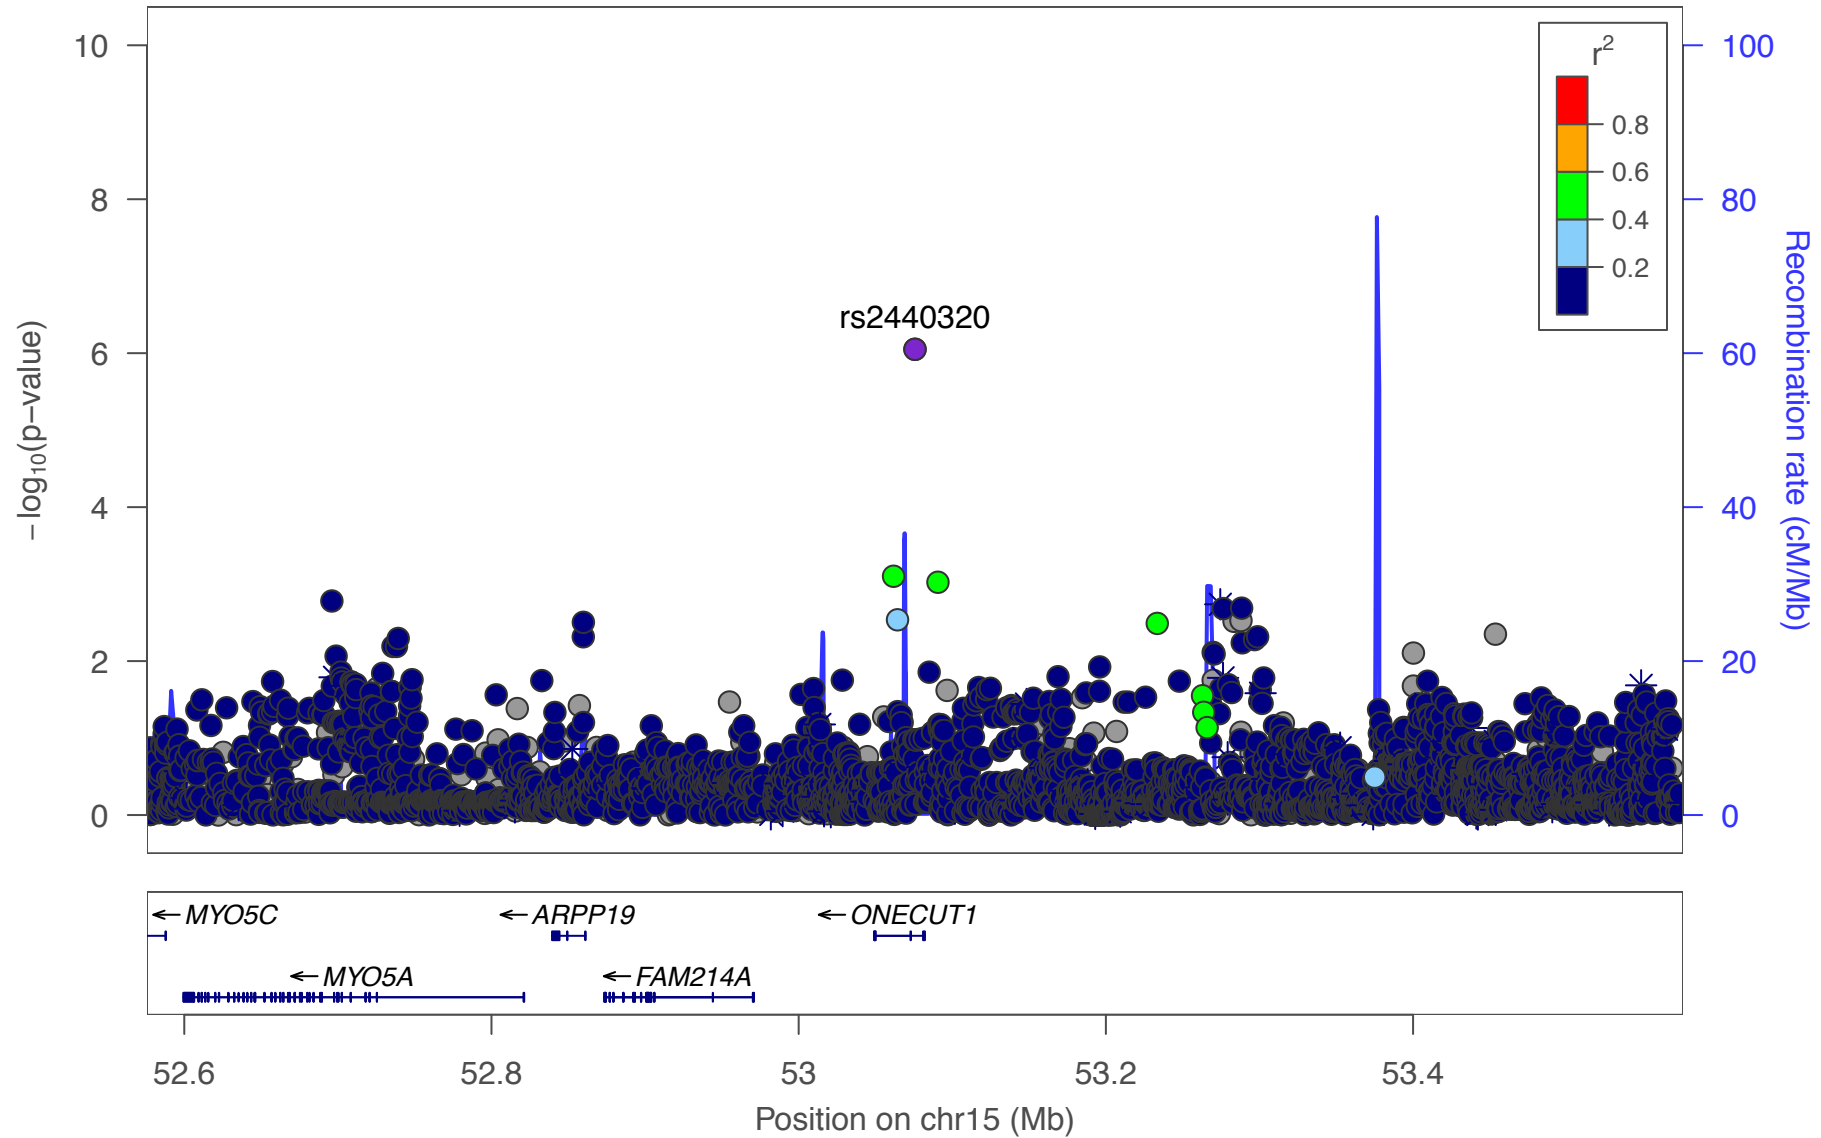



# OFC.MCL

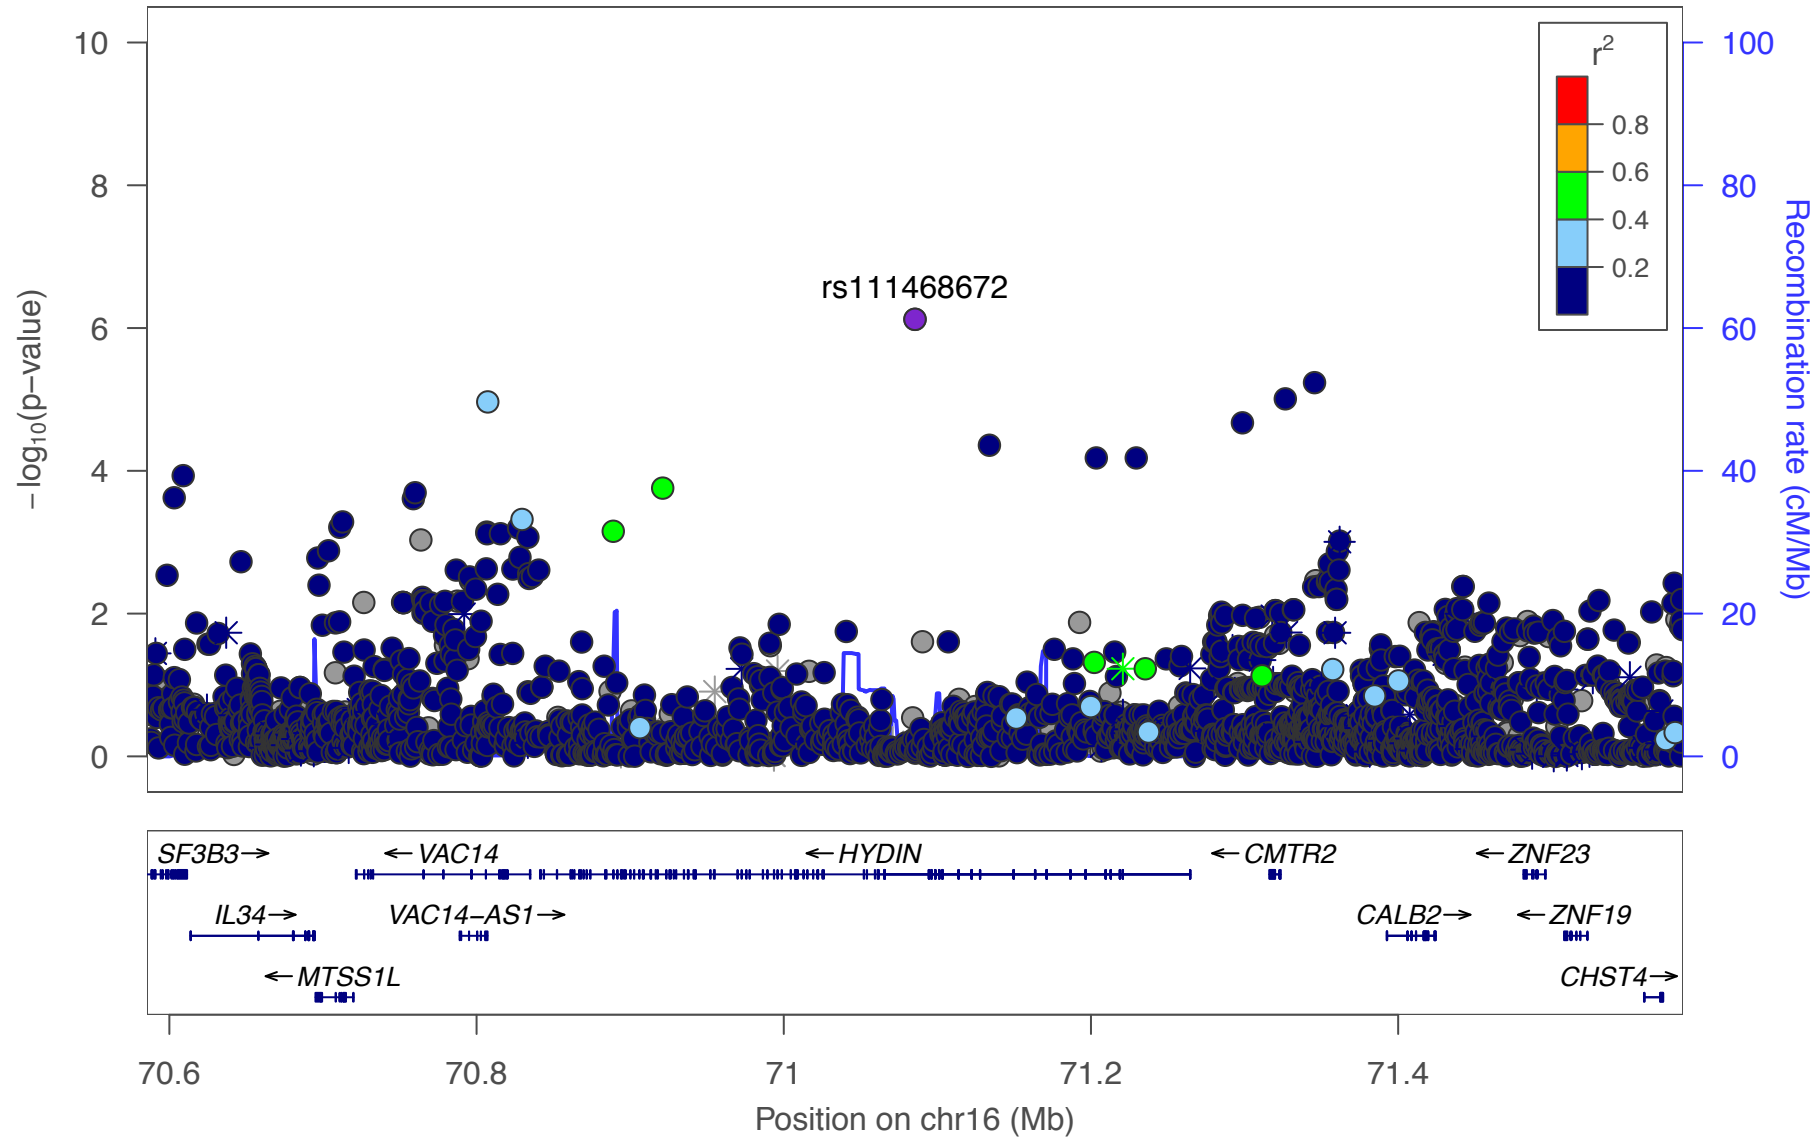

# OFC.MCL

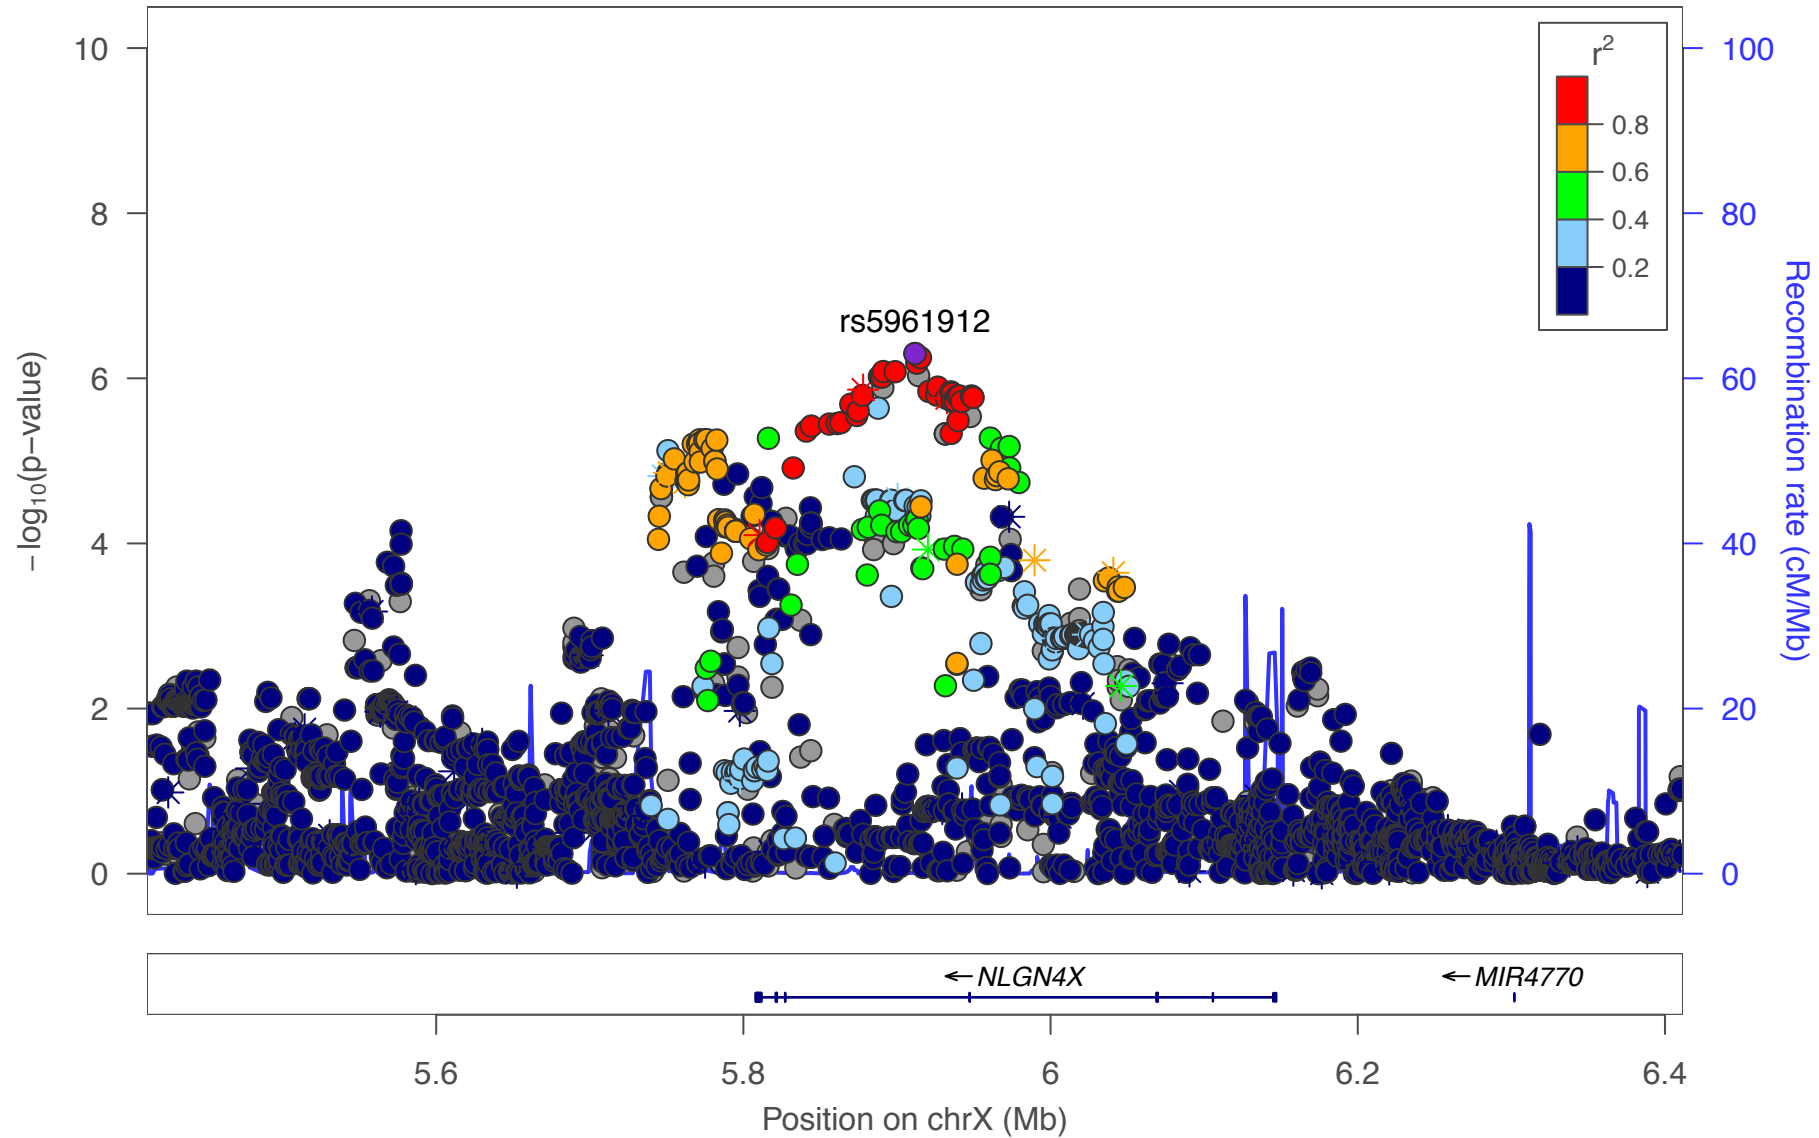

# OFC.CI

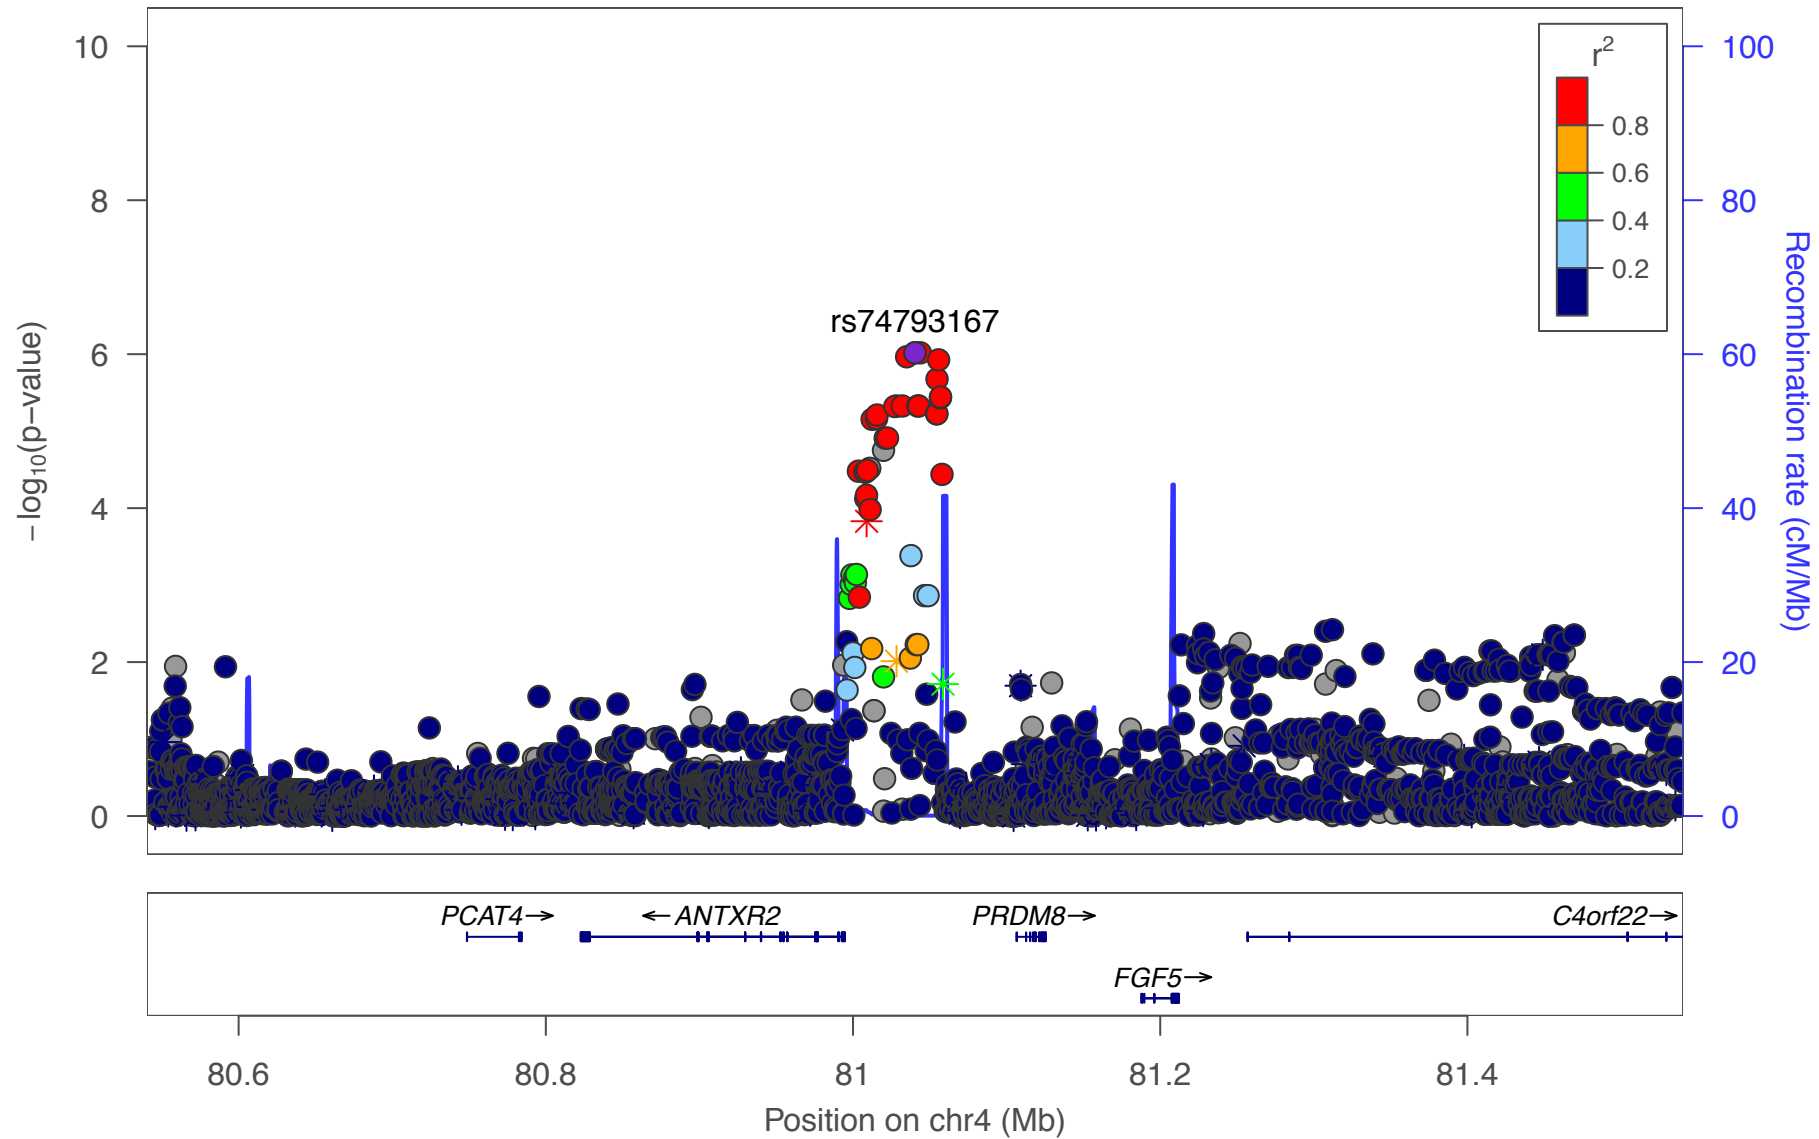

# OFC.CI

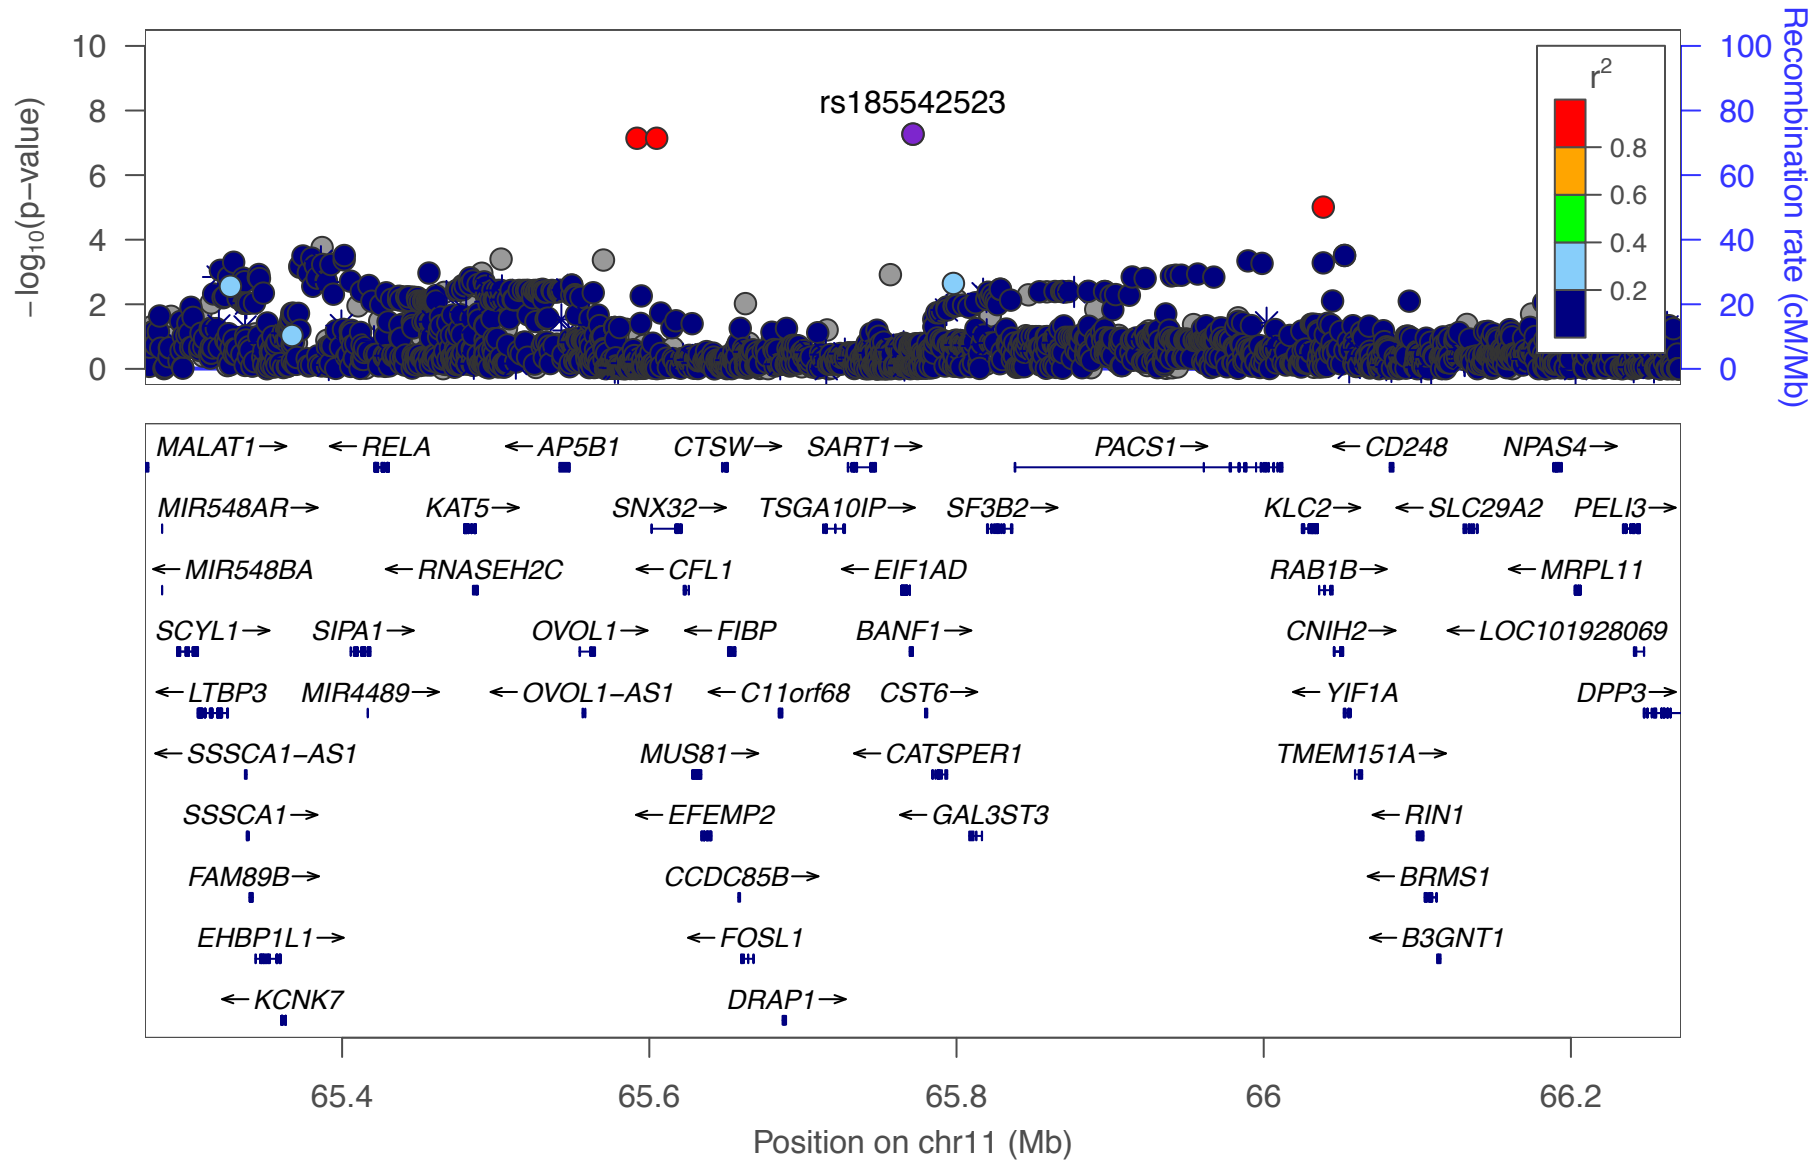

Supplement: pone.0196148.s011.pdf [file pone.0196148.s011.pdf]
