# Supplementary material for: Mapping genetic variants for cranial vault shape in humans
Source: PubMed Central journal article supplement (PMC5919379; doi:10.1371/journal.pone.0196148), 2018-04-26

Figure S6

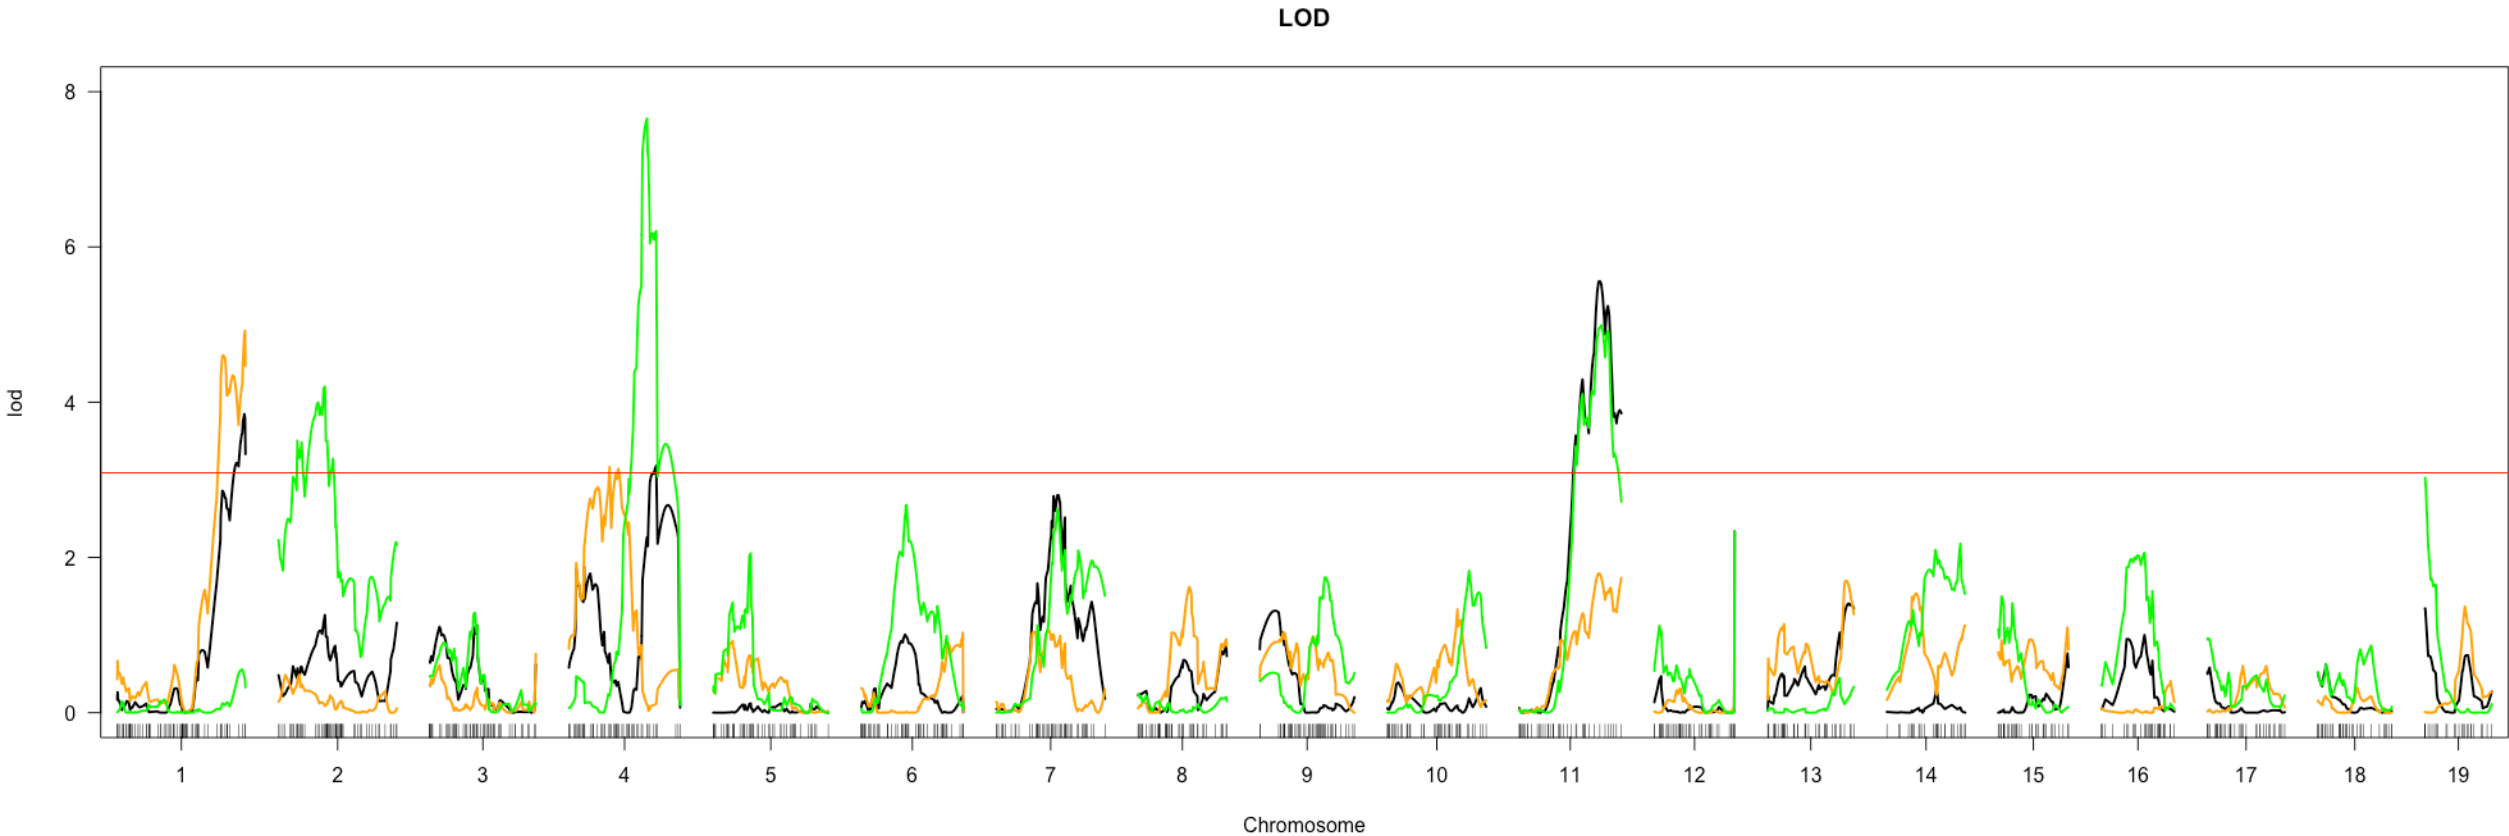

Supplement: pone.0196148.s013.pdf [file pone.0196148.s013.pdf]
