# Supplementary material for: Mapping genetic variants for cranial vault shape in humans
Source: PubMed Central journal article supplement (PMC5919379; doi:10.1371/journal.pone.0196148), 2018-04-26

# OFC.CI

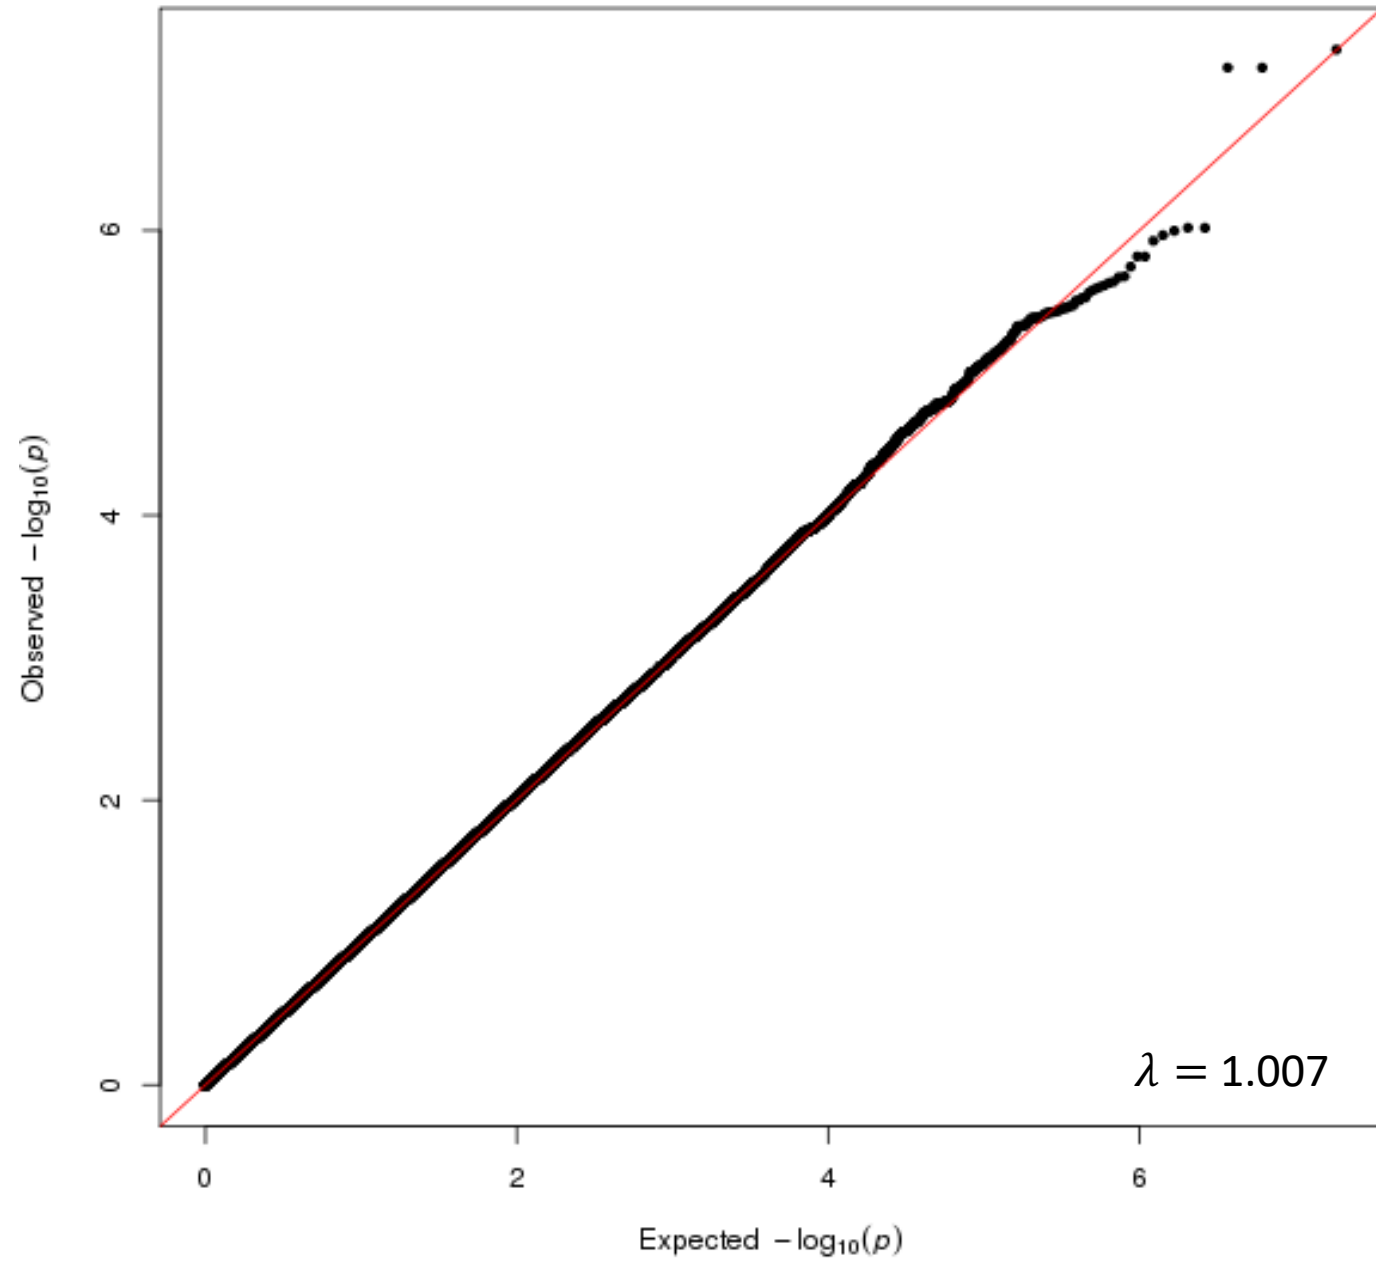

# FV.CI

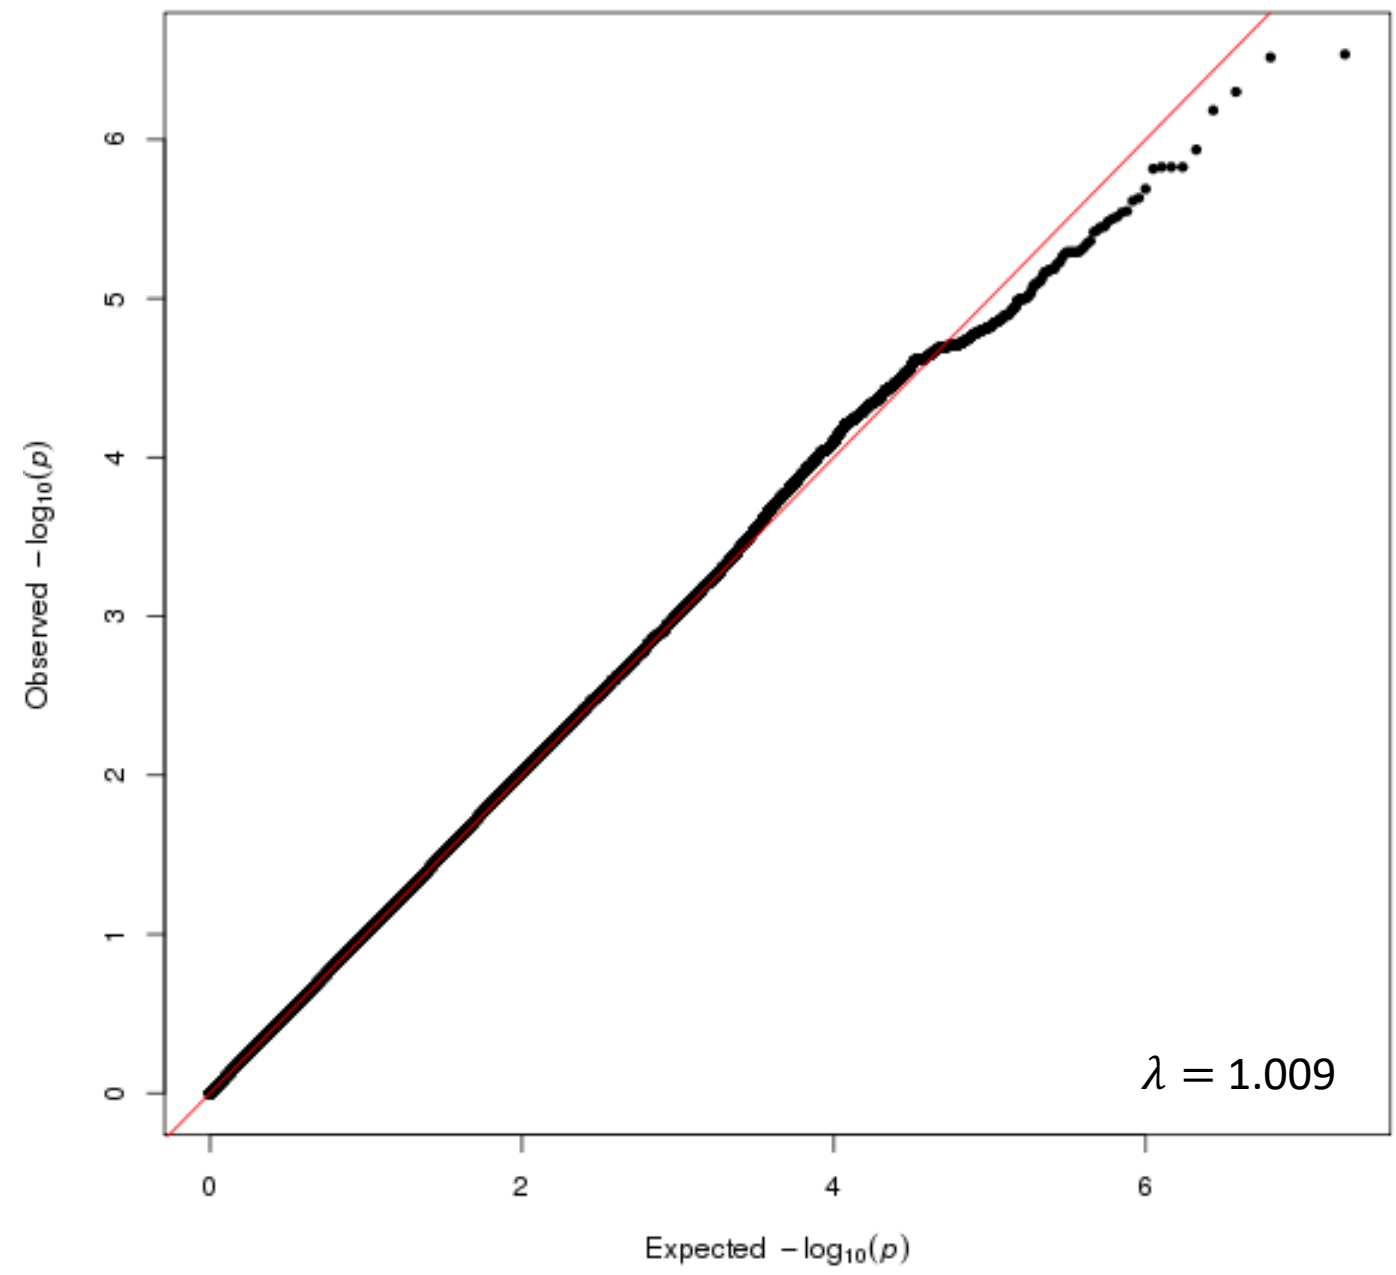

# FV.MCL

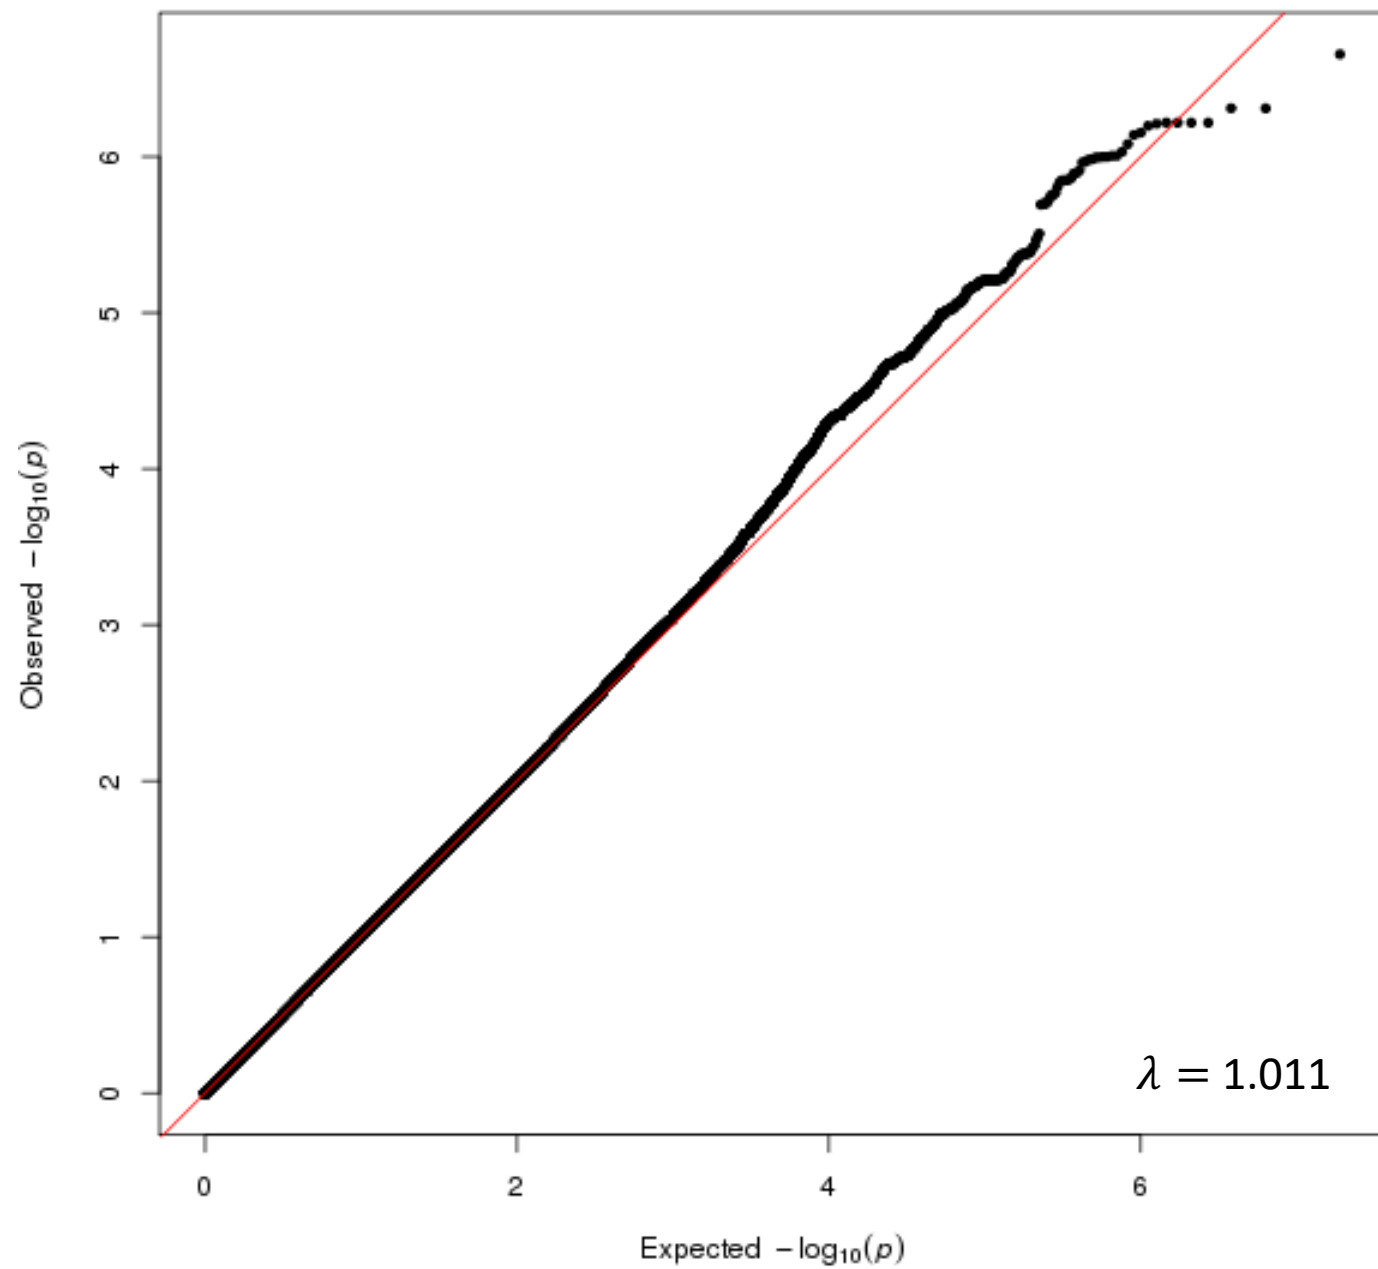

# FV.MCW

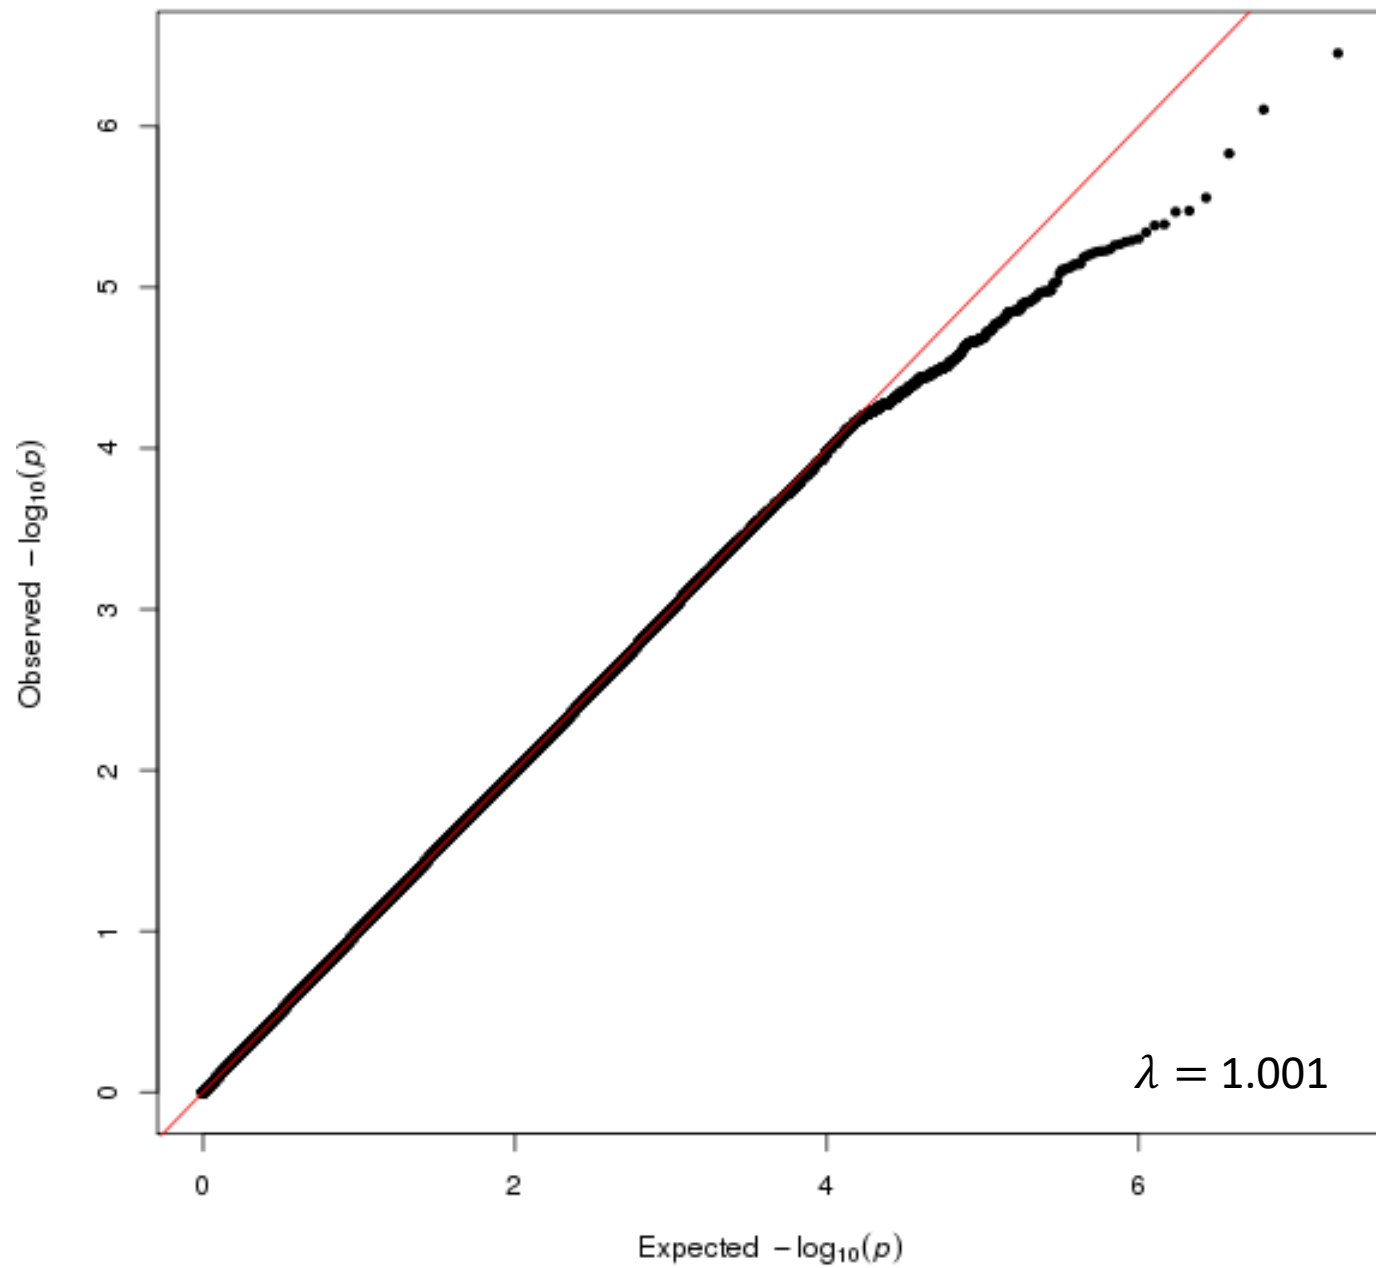

# OFC.MCL

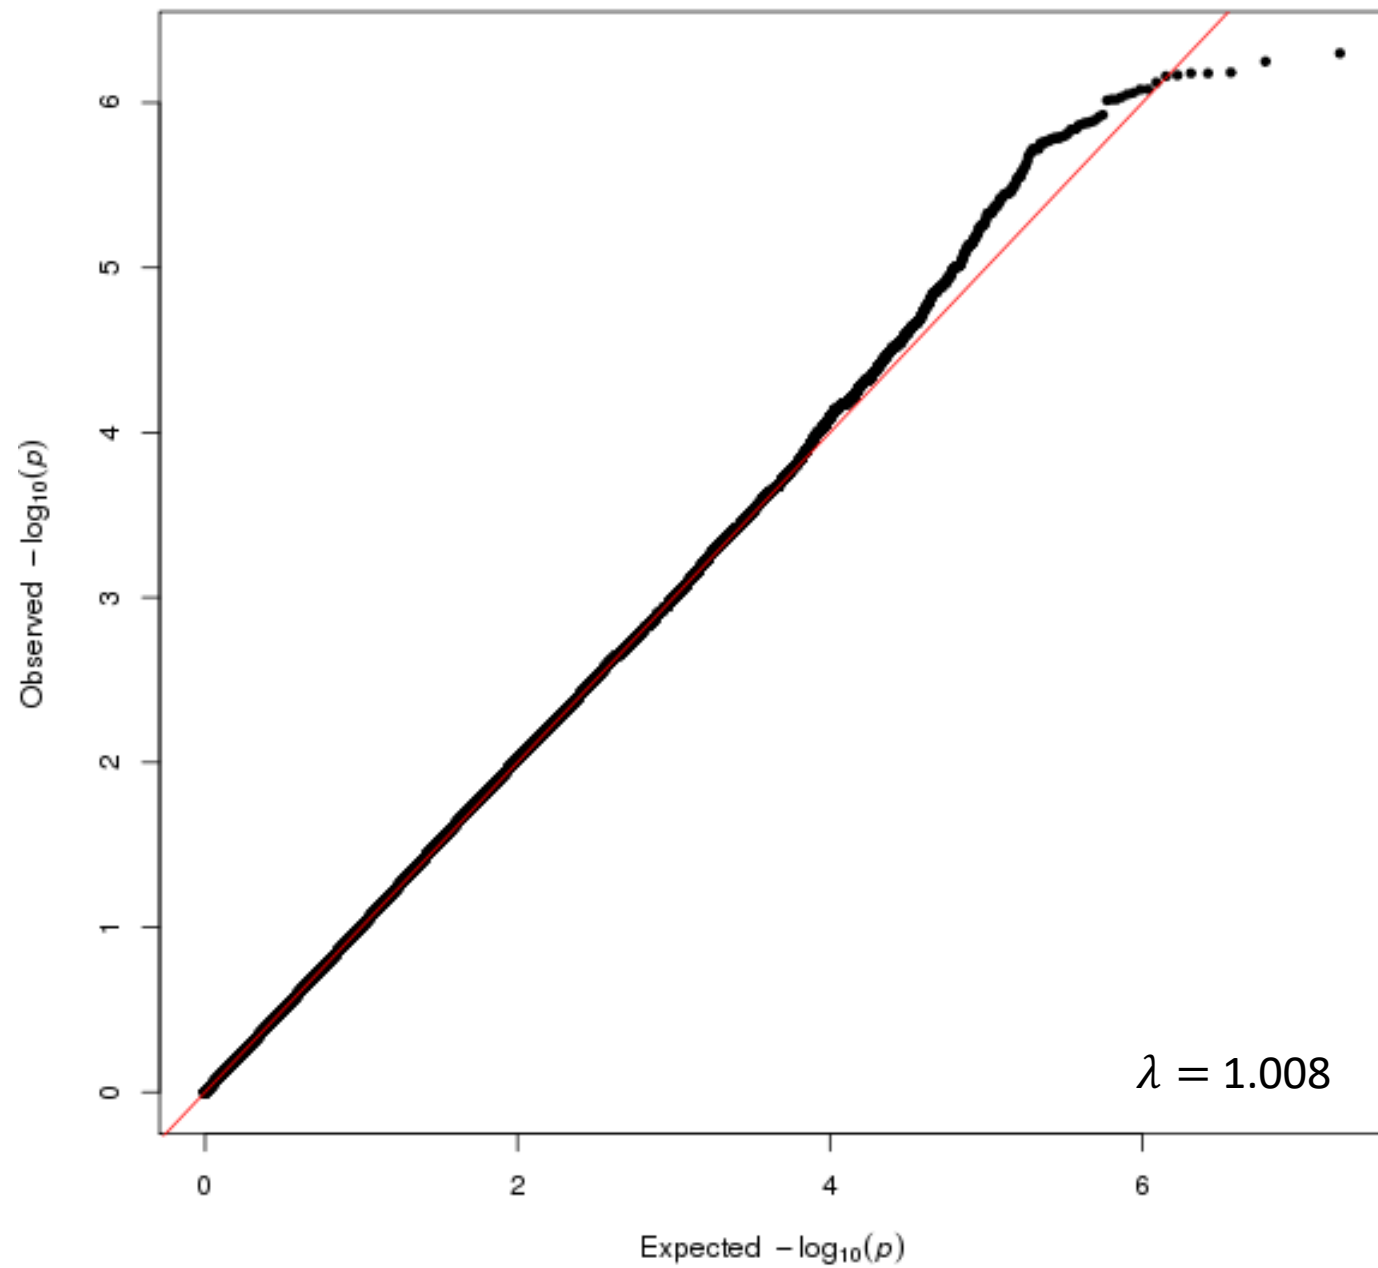

# OFC.MCW

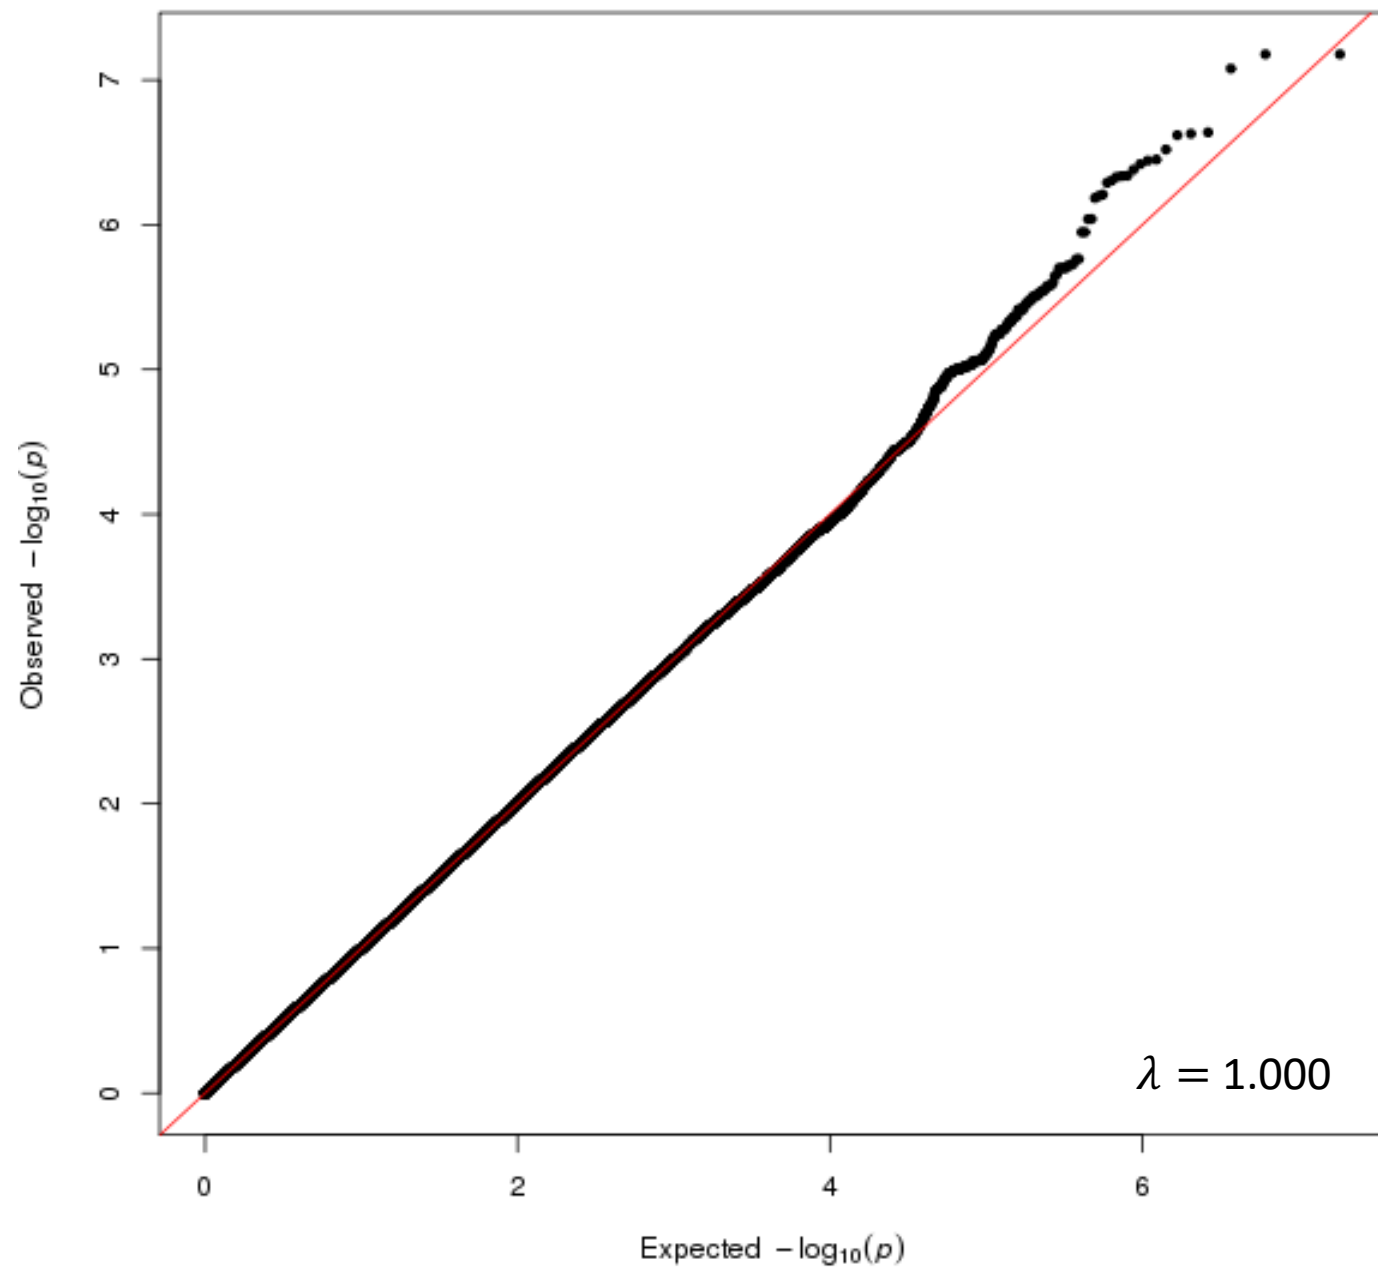

# Meta.CI

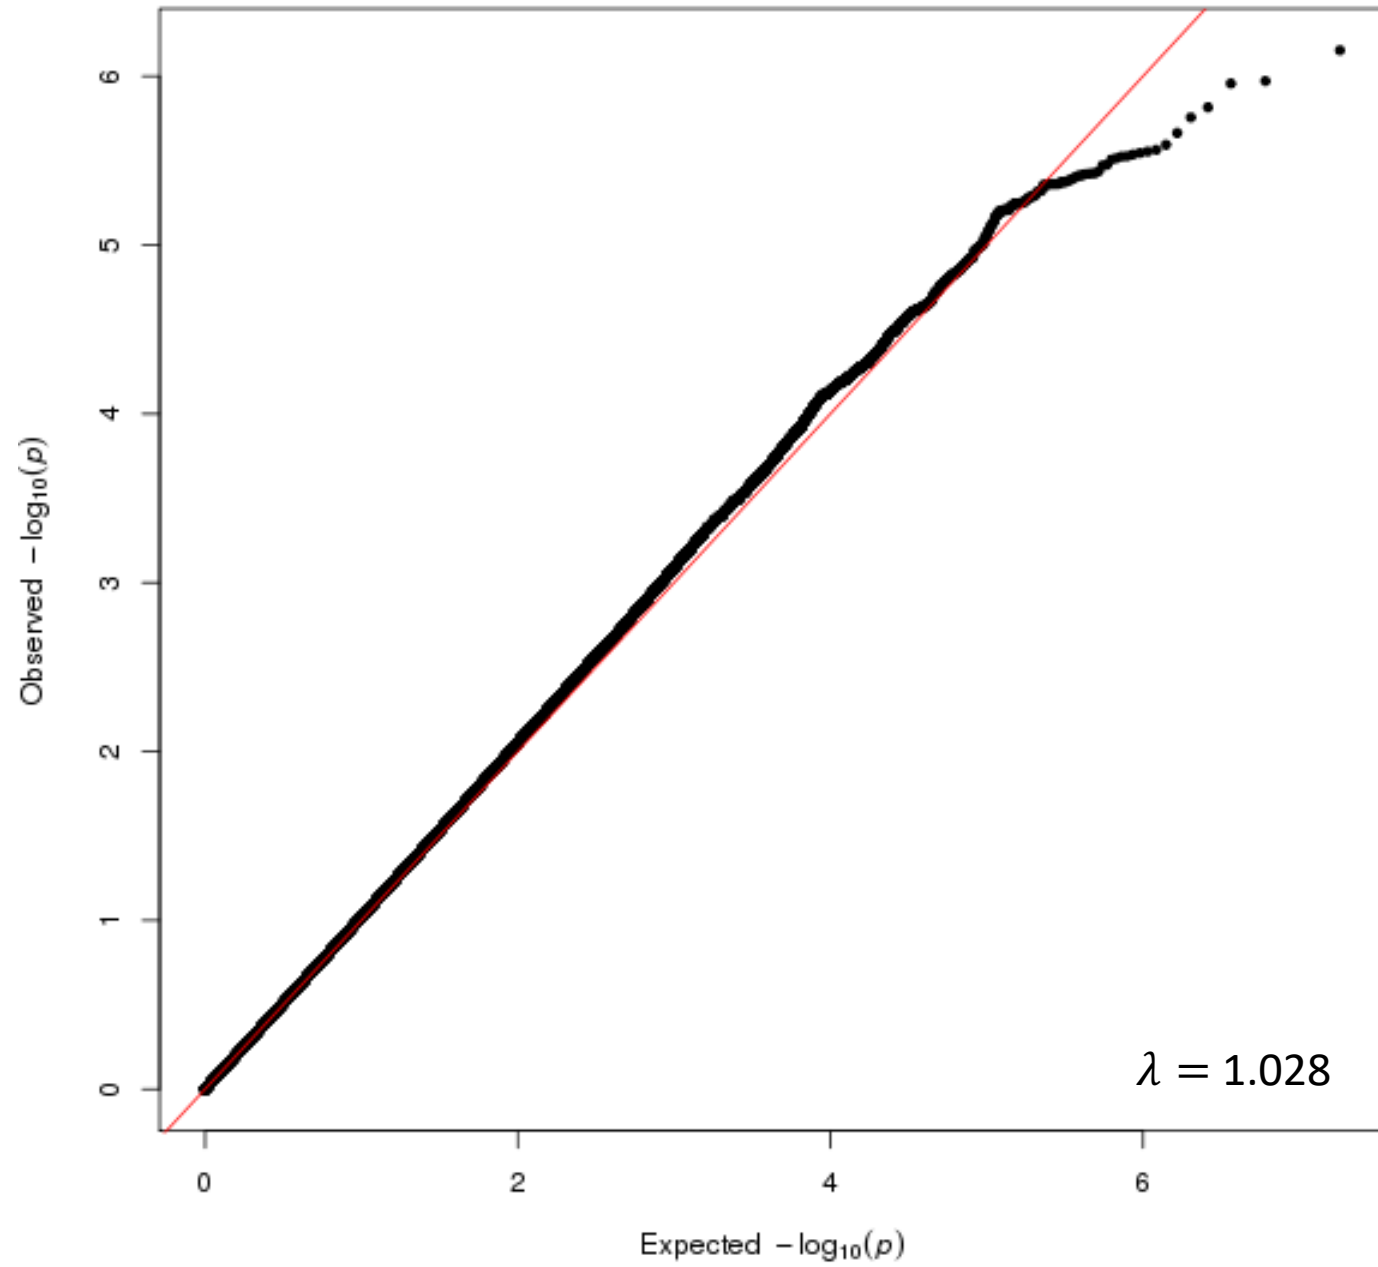

# Meta.MCL

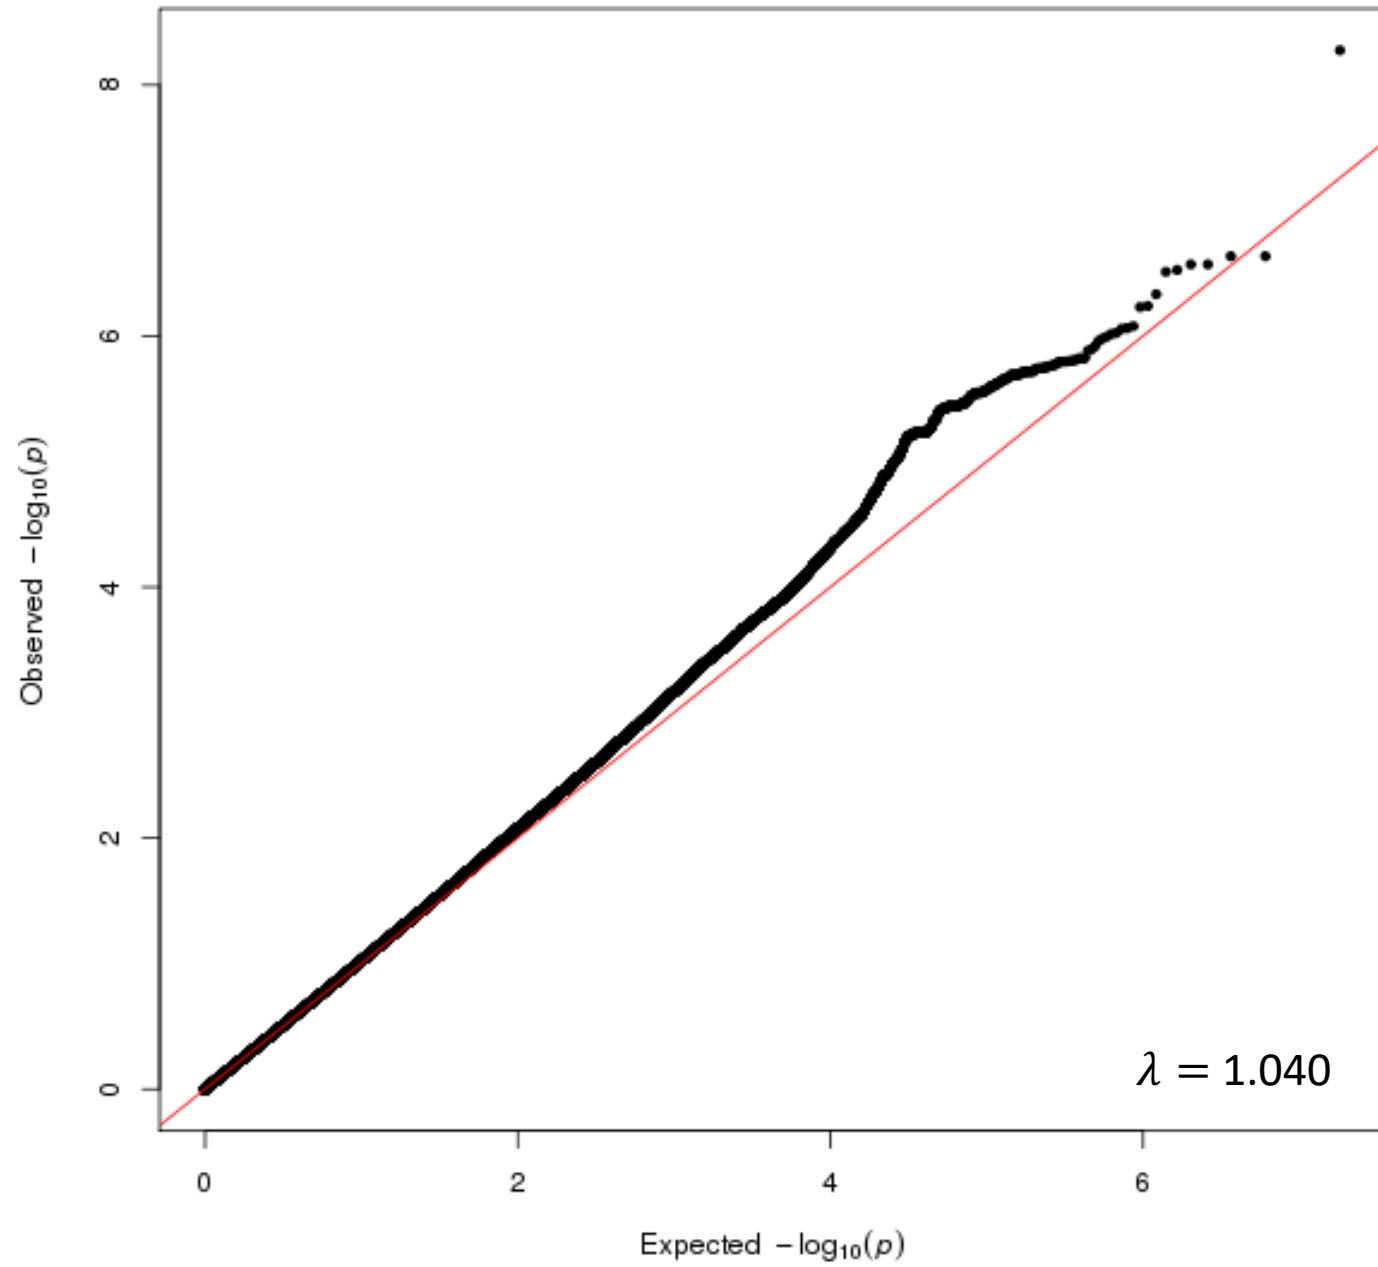



# Meta.MCW

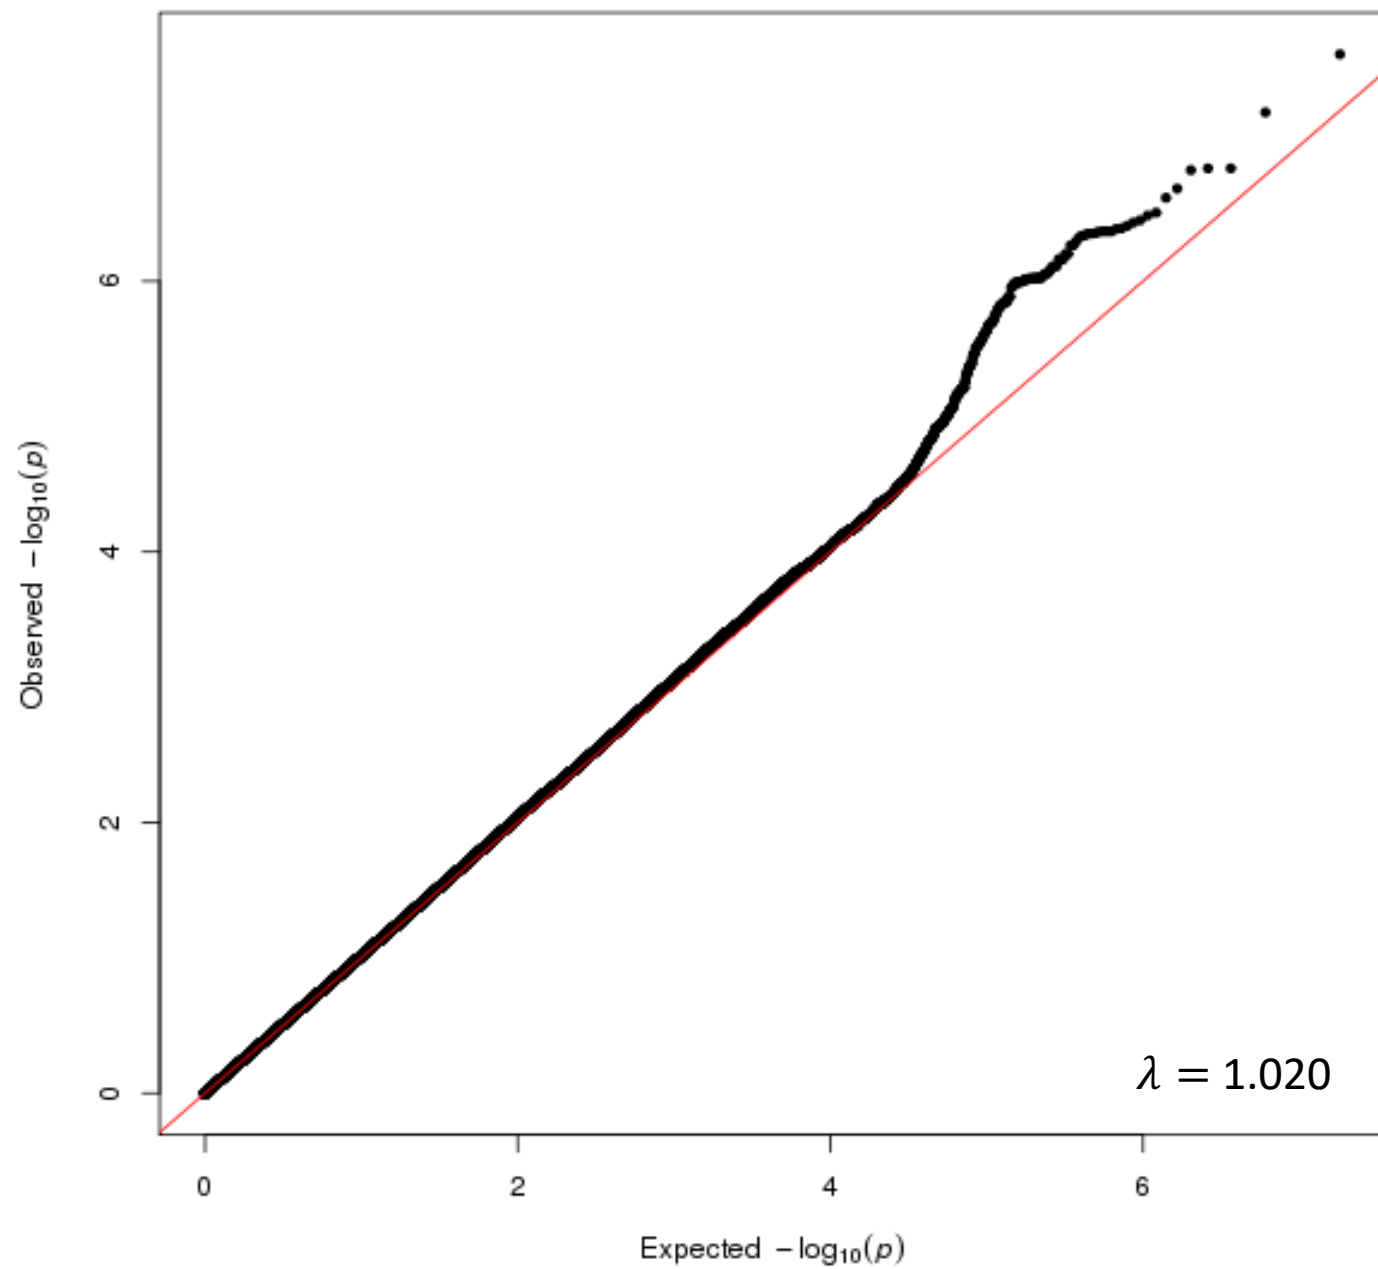

Supplement: pone.0196148.s016.pdf [file pone.0196148.s016.pdf]
